# Supplementary material for: Aziridination Reactivity of a Manganese(II) Complex with a Bulky Chelating Bis(Alkoxide) Ligand
Source: MDPI journal article supplement (doi:10.3390/molecules27185751), 2022-09-06
Supplement: s1 [file s1]

# **Supplementary Material**

for

Aziridination Reactivity of a Manganese(II) Complex with a Bulky Chelating Bis(Alkoxide)  
Ligand

Sudheer Kurup,<sup>a</sup> Natalie M. Woodland,<sup>b</sup> Richard L. Lord,<sup>\*b</sup> Stanislav Groysman<sup>\*a</sup>

| Table of Contents                                                      |    |
|------------------------------------------------------------------------|----|
| 1. Characterization of <b>2</b> and its stoichiometric reactivity      | 3  |
| 2. NMR spectra of the aziridine products                               | 17 |
| 3. GC-MS spectra of the aziridine products                             | 27 |
| 4. Computational data                                                  | 31 |
| 5. Table S4: Crystal and refinement data for the structure of <b>2</b> | 72 |

## 1. Characterization of $\text{Mn}[\text{O-terphenyl-O}]^{\text{Ph}}(\text{THF})_2$ (2) and its stoichiometric reactivity

**Evans method formula and procedure.** Evans method was carried out using a standard NMR tube and a Wilmad coaxial insert (purchased from Aldrich). Carefully weighted (83 and 112 mg) sample of the Mn complex was dissolved in 1 ml of  $\text{C}_6\text{D}_6$  to prepare known concentrations of solutions which was further used for calculations. The insert with the solution was then placed inside an NMR tube containing  $\text{C}_6\text{D}_6$ . The resulting NMR spectra were used to measure molar susceptibility  $\chi_m$ . It was calculated using the equation (1).

$$\chi_m = \left[ \frac{3\Delta\nu}{4\pi m\nu_0} + \chi_0 \right] M \quad (\text{Eq. 1})$$

Where  $\Delta\nu$  is the peak separation (Hz),  $m$  is the concentration of the solution (g/mL),  $\nu_0$  is the spectrometer operating frequency in Hz,  $\chi_0$  is the molar susceptibility of the solvent (in  $\text{cm}^3/\text{g}$ ), and  $M$  is the molar mass of the compound (g/mol). Diamagnetic corrections were calculated using Pascals constants. The solution state effective magnetic moment ( $\mu_{\text{eff}}$ ) was calculated using Equation 2:

$$\mu_{\text{eff}} = \sqrt{(2.383 \times 10^3)(\chi_m)} \quad (\text{Eq. 2})$$

|   |      |
|---|------|
| 1 | 5.68 |
| 2 | 5.97 |

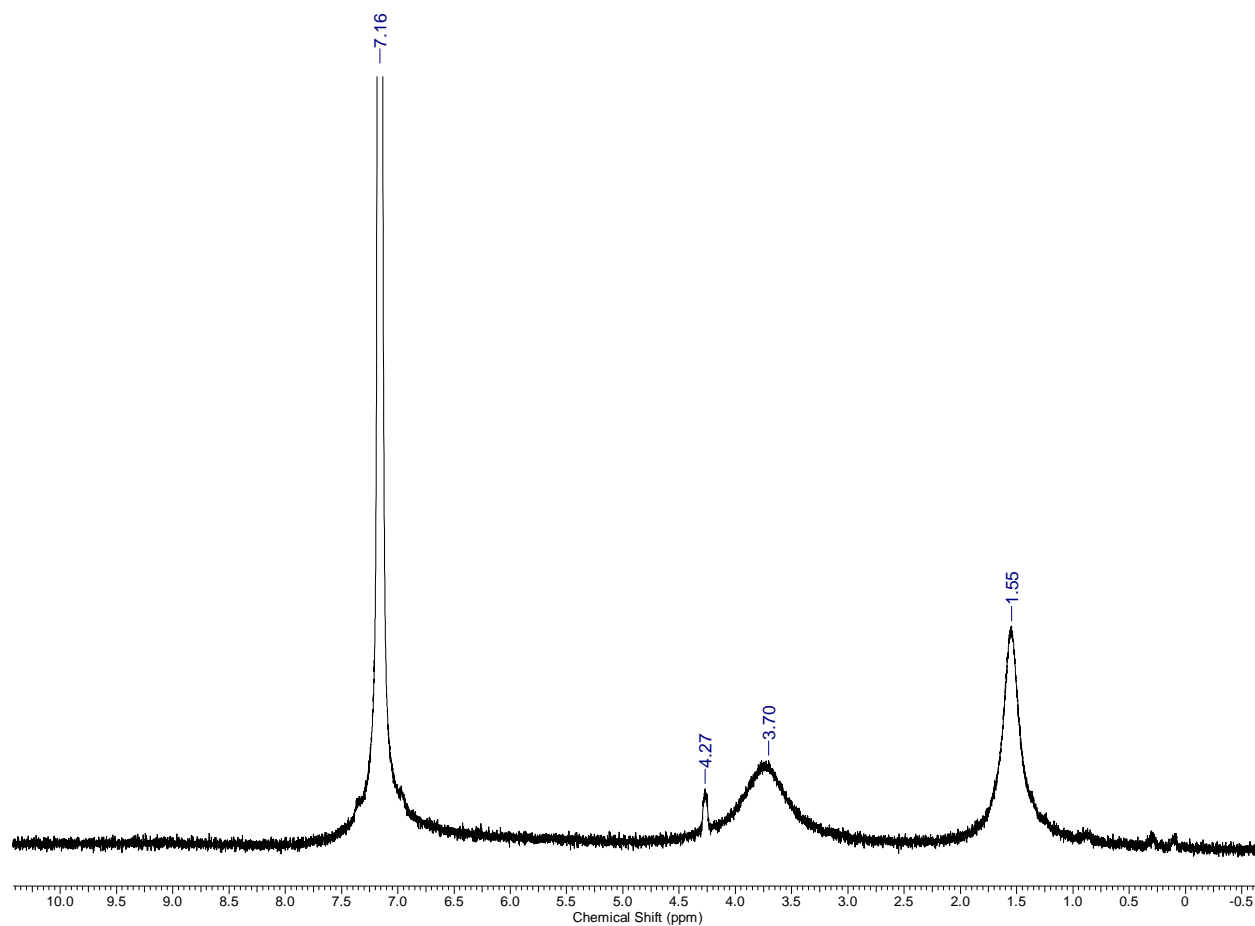

**Figure S1.**  $^1\text{H}$  NMR of  $\text{Mn}[\text{O-terphenyl-O}]^{\text{Ph}}(\text{THF})_2$  ( $\text{C}_6\text{D}_6$ ) in the -0.5 ppm – 10.5 ppm range. Peaks at 1.55 and 3.70 ppm are THF signals and the peak at 4.27 ppm is  $\text{CH}_2\text{Cl}_2$ .

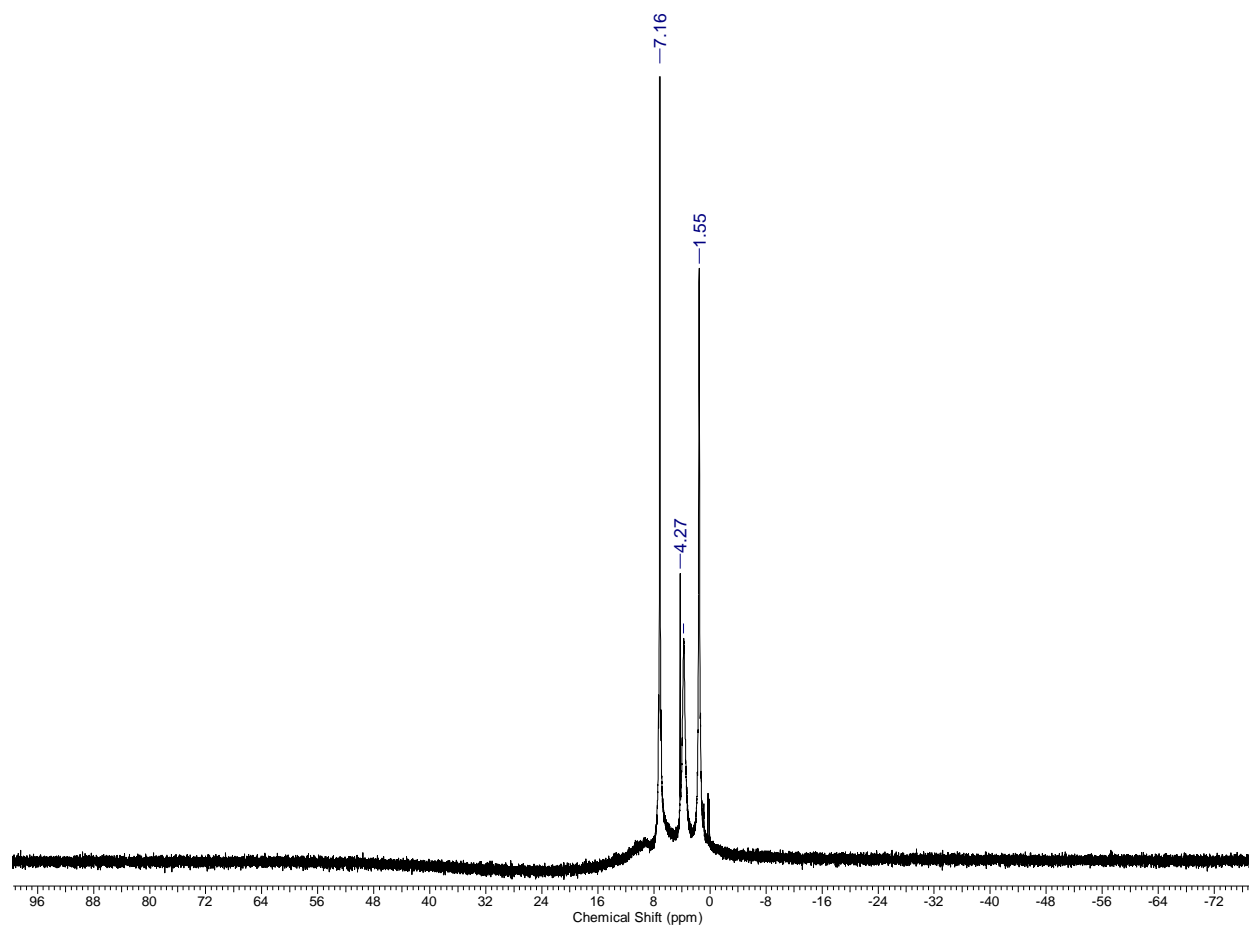

**Figure S2.**  $^1\text{H}$  NMR of  $\text{Mn}[\text{O-terphenyl-O}]^{\text{Ph}}(\text{THF})_2$  taken in the broad (-72 ppm – 100 ppm) range. Peaks at 1.55 and 3.70 ppm are broad THF signals and 4.27 ppm is  $\text{CH}_2\text{Cl}_2$ .

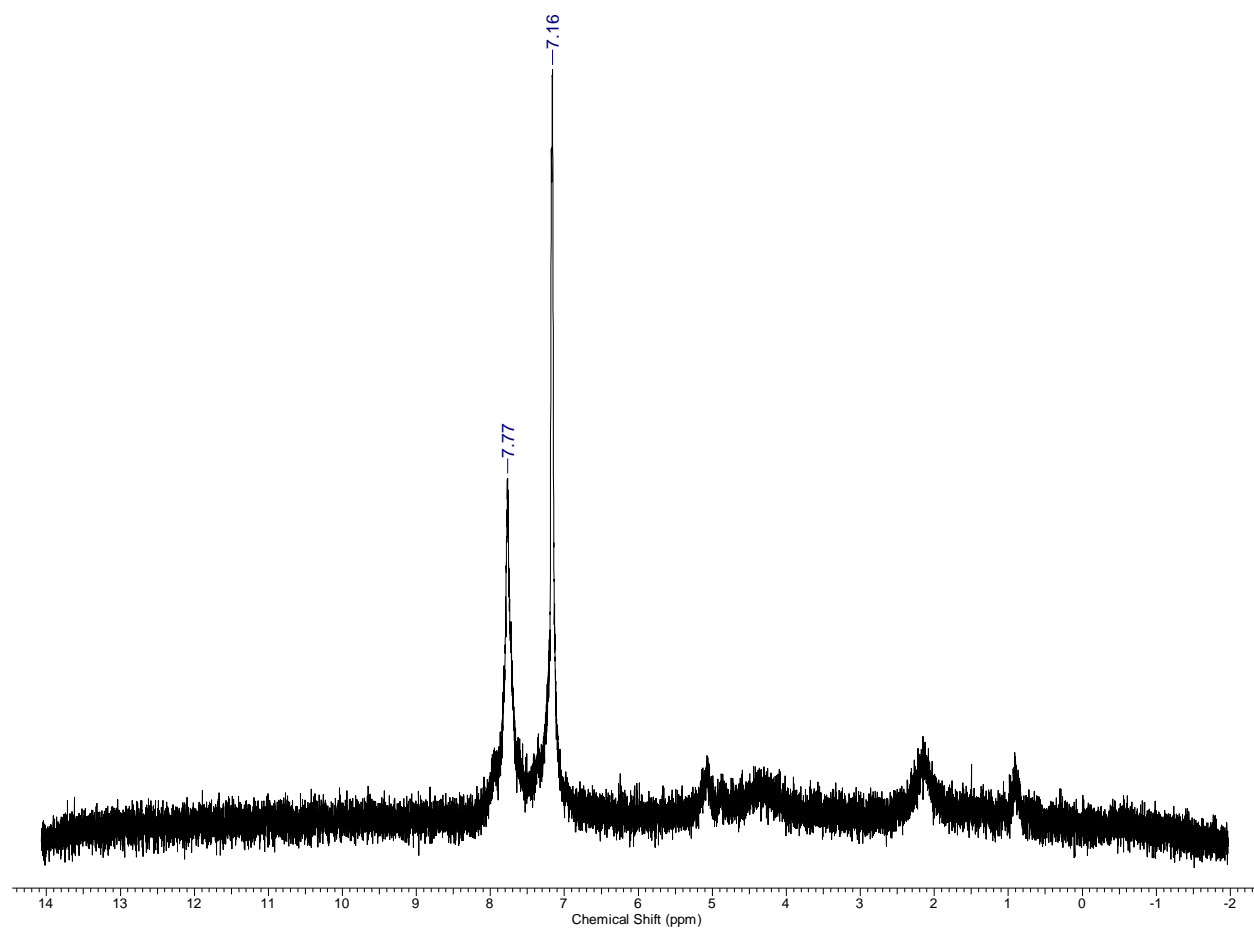

**Figure S3.** Characterization of **2** by Evans method (experiment #1).

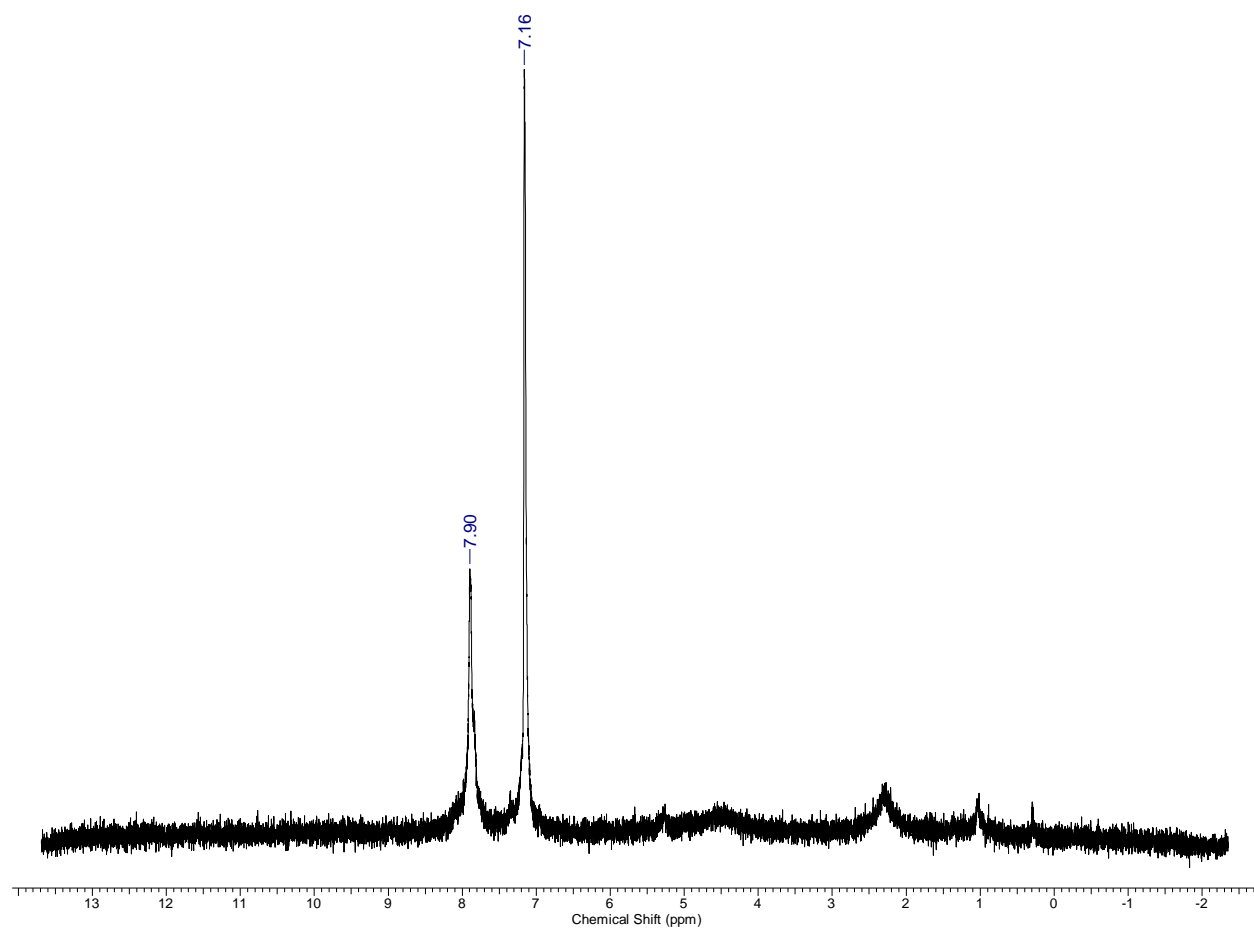

**Figure S4.** Characterization of **2** by Evans method (experiment #2).

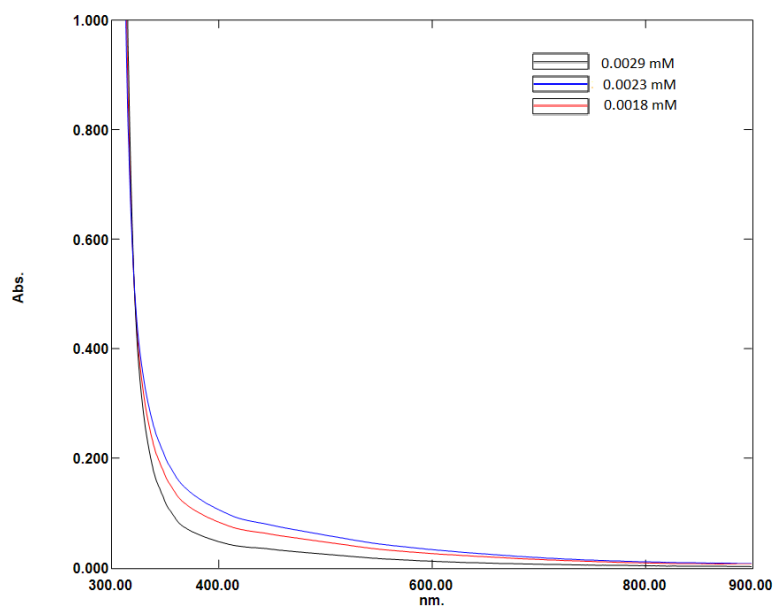

**Figure S5.** UV-vis spectrum of **2** at three different concentrations.



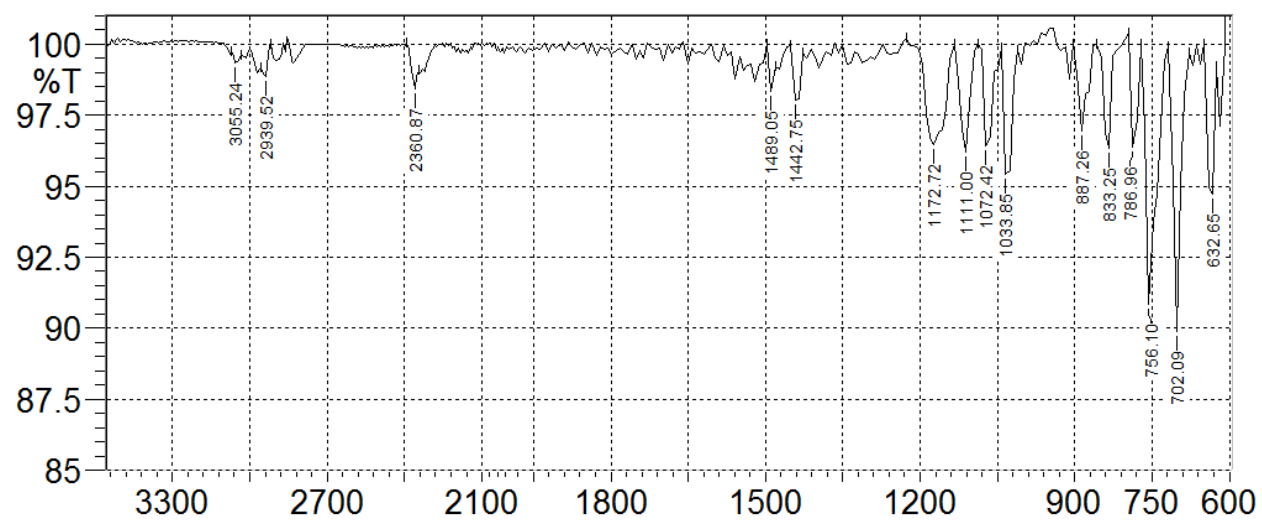

**Figure S6.** IR spectrum of **2**.

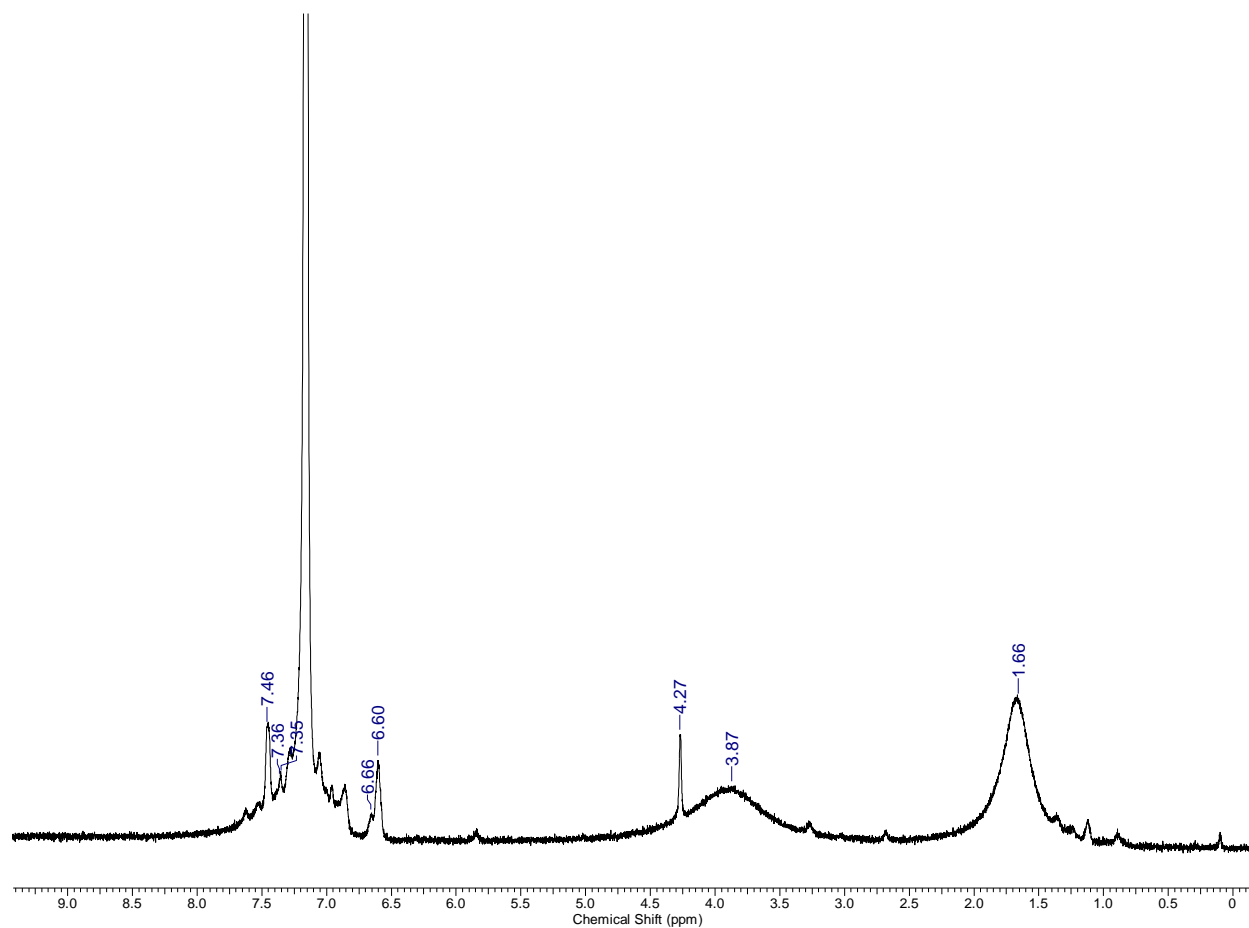

**Figure S7.** <sup>1</sup>H NMR of the reaction between **2** and PhINTs (in the absence of styrene). Peaks at 1.66 and 3.87 ppm are broad THF signals and 4.27 ppm is CH<sub>2</sub>Cl<sub>2</sub>. Peaks at 6.60 ppm is and 7.46 ppm are PhI resonances.

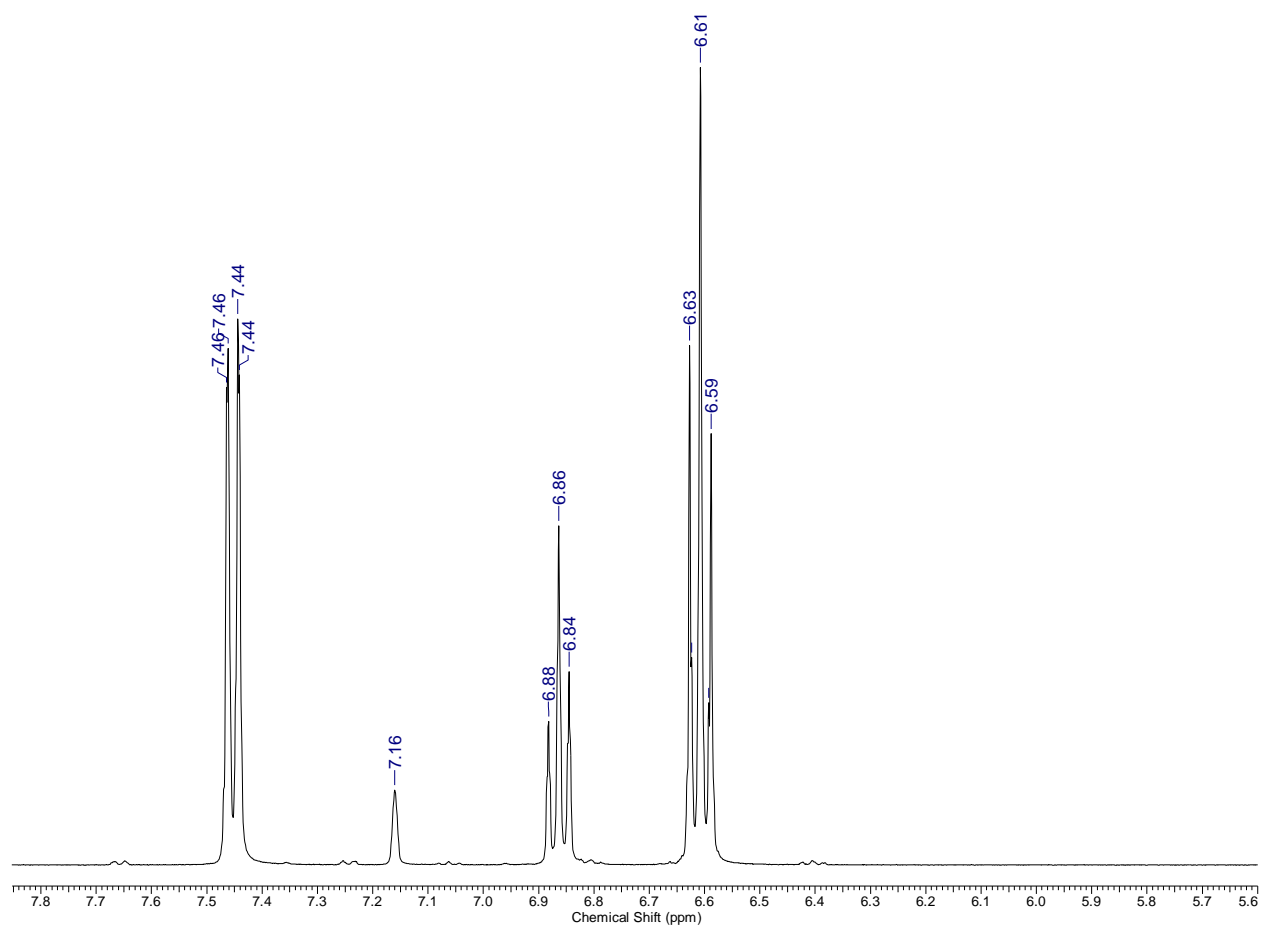

**Figure S8.**  $^1\text{H}$  NMR spectrum of PhI in  $\text{C}_6\text{D}_6$  (aromatic region).

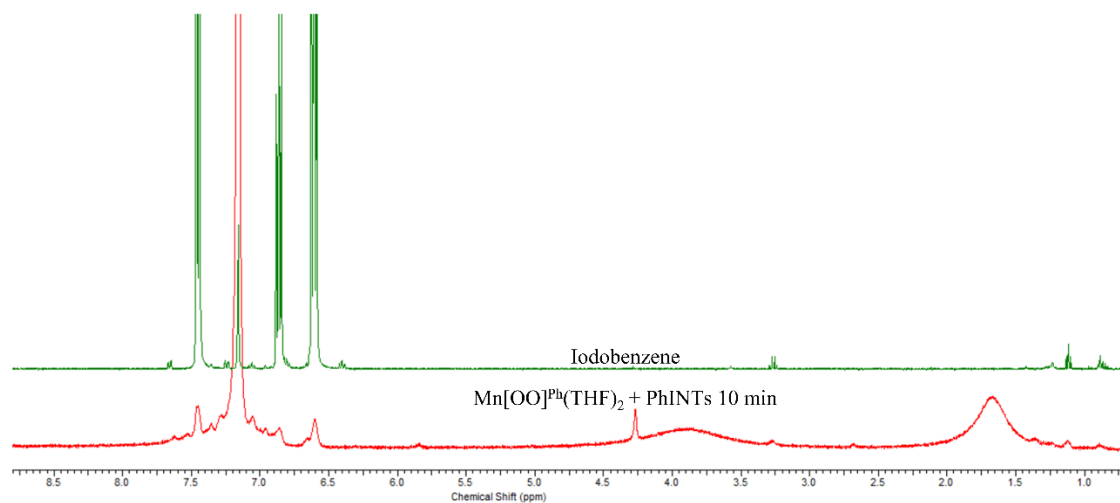

**Figure S9.** Stacked  $^1\text{H}$  NMR spectra of PhI (top) and of  $\{\text{Mn}[\text{O-terphenyl-O}]^{\text{Ph}}(\text{THF})_2 + \text{PhINTs}\}$  reaction (bottom) in  $\text{C}_6\text{D}_6$ .

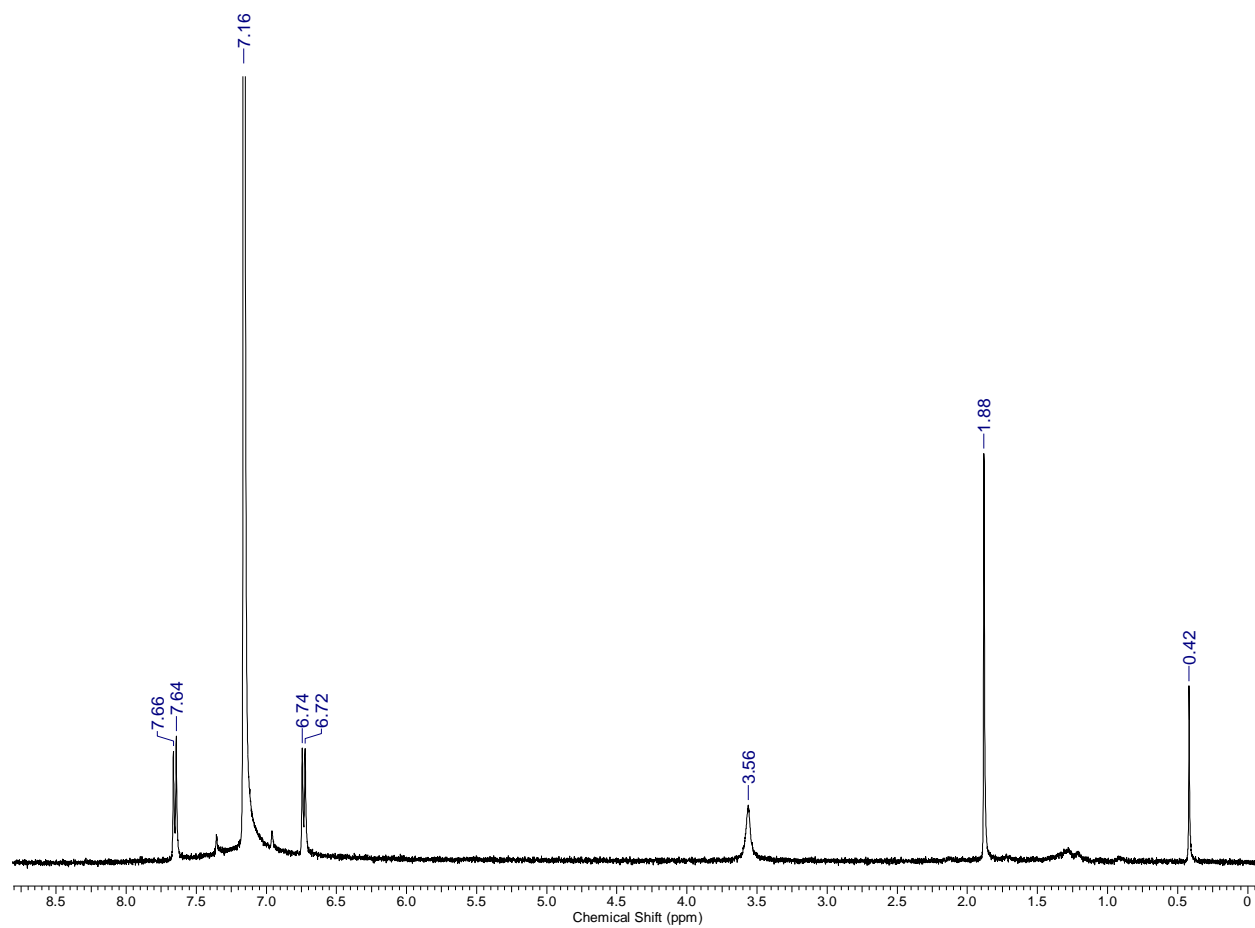

**Figure S10.**  $^1\text{H}$  NMR of tosylamide in  $\text{C}_6\text{D}_6$ .

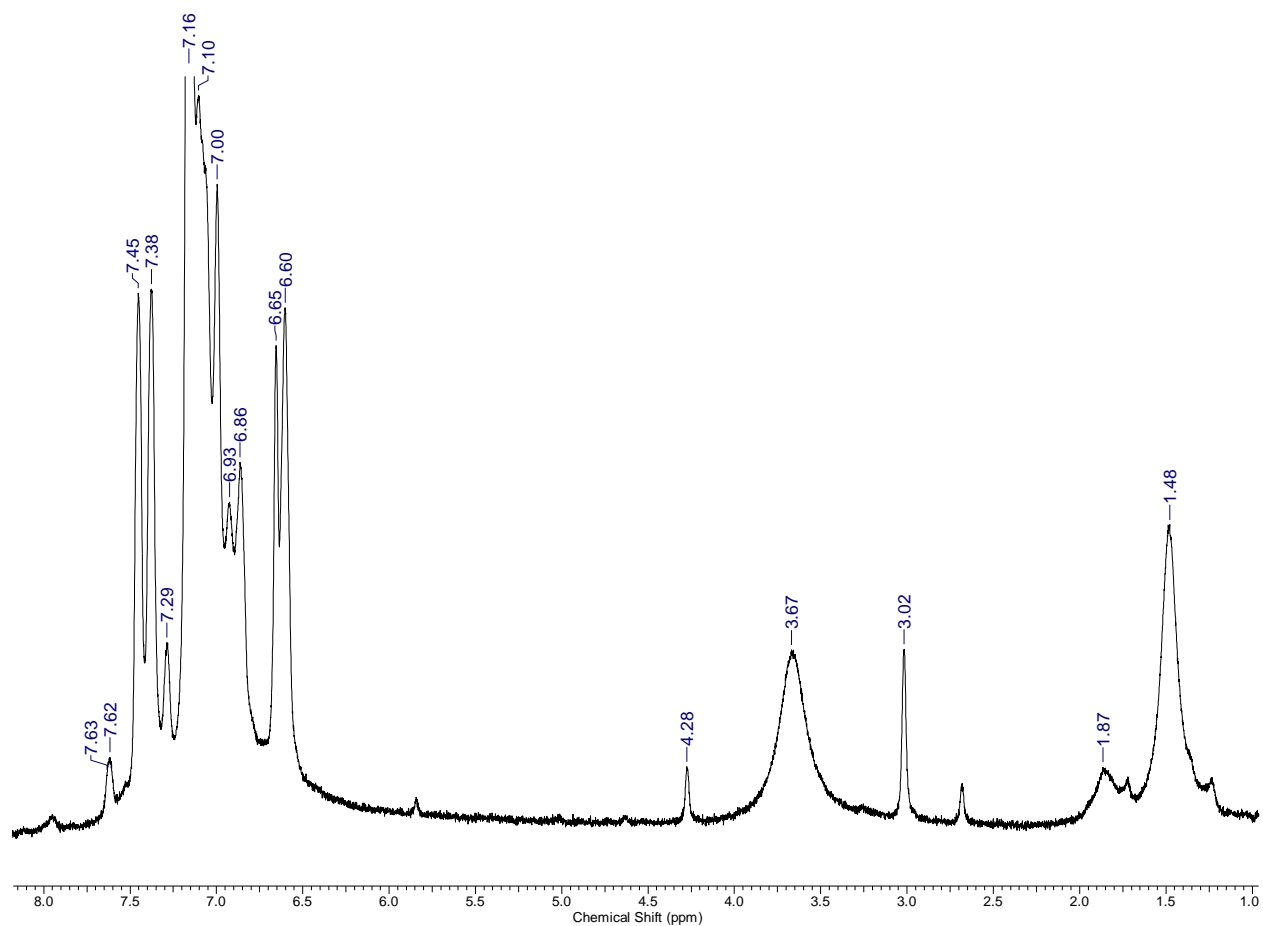

**Figure S11.**  $^1\text{H}$  NMR spectrum of the reaction between  $\text{Mn}[\text{O-terphenyl-O}]^{\text{Ph}}(\text{THF})_2$  and PhINTs in  $\text{C}_6\text{D}_6$  after 20 h. Peaks at 1.87 and 7.62-7.63 correspond with  $\text{TsNH}_2$ . Peaks at 6.60 ppm and 7.45 ppm correspond to iodobenzene.

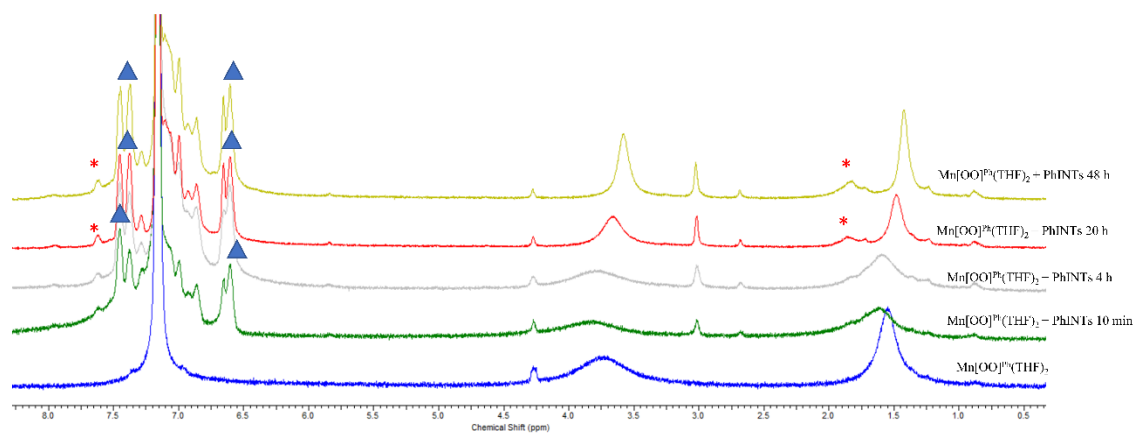

**Figure S12.**  $^1\text{H}$  NMR spectra of the reaction of  $\text{Mn}[\text{O-terphenyl-O}]^{\text{Ph}}(\text{THF})_2$  and PhINTs in  $\text{C}_6\text{D}_6$  at different times. Peaks at 1.87 and 7.62-7.63 (marked by \*) correspond to  $\text{TsNH}_2$ .

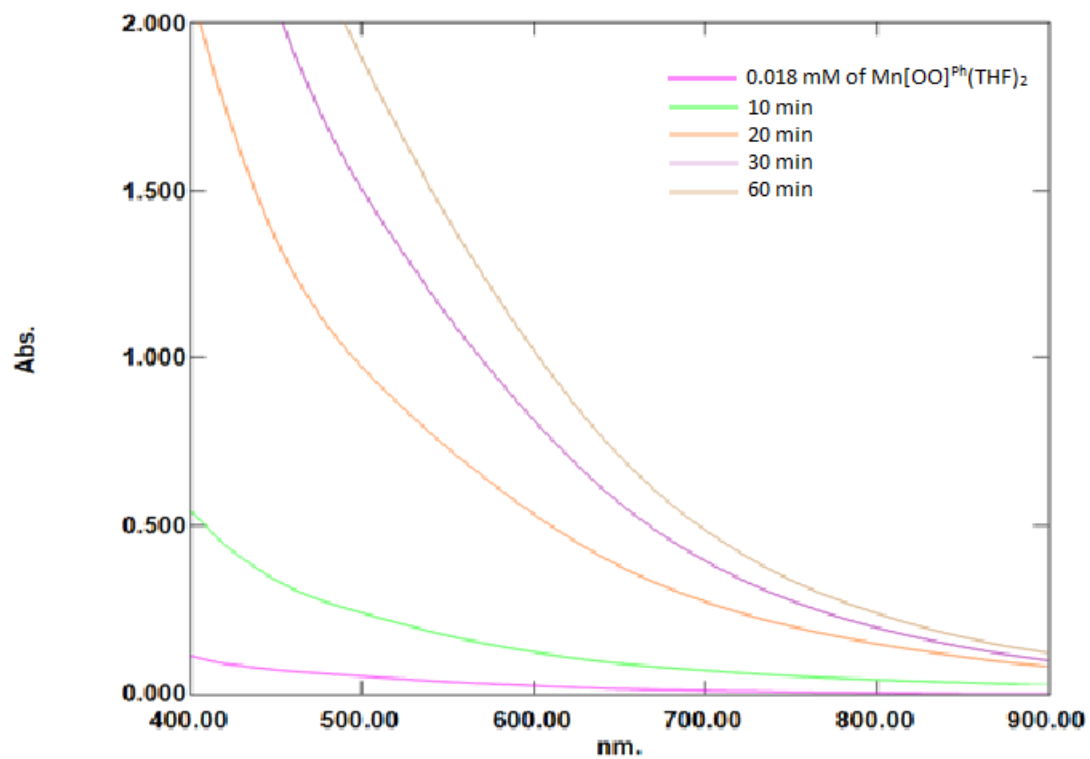

**Figure S13.** UV spectrum of 0.018 mM solution of  $\text{Mn}[\text{O-terphenyl-O}]^{\text{Ph}}(\text{THF})_2$  on addition of stoichiometric amounts of PhINTs at different time.



## 2. $^1\text{H}$ NMR characterization of the aziridine products.

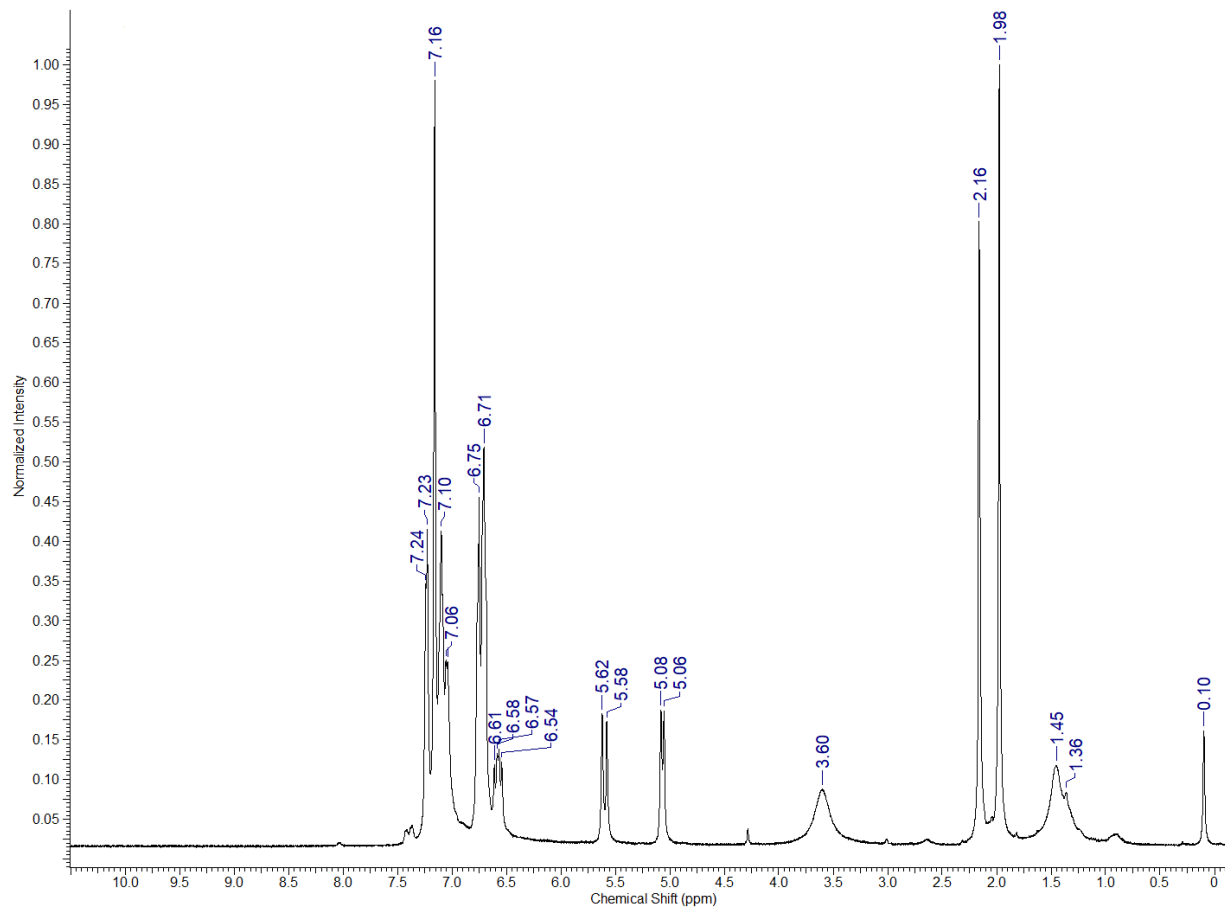

**Figure S14.**  $^1\text{H}$  NMR demonstrating no formation of 2-phenyl-1-(p-tolyl)aziridine from the reaction of 4-azidotoluene with styrene and  $\text{Fe}[\text{O-terphenyl-O}]^{\text{Ph}}(\text{THF})_2$ . The peak at 2.16 ppm corresponds to mesitylene standard.

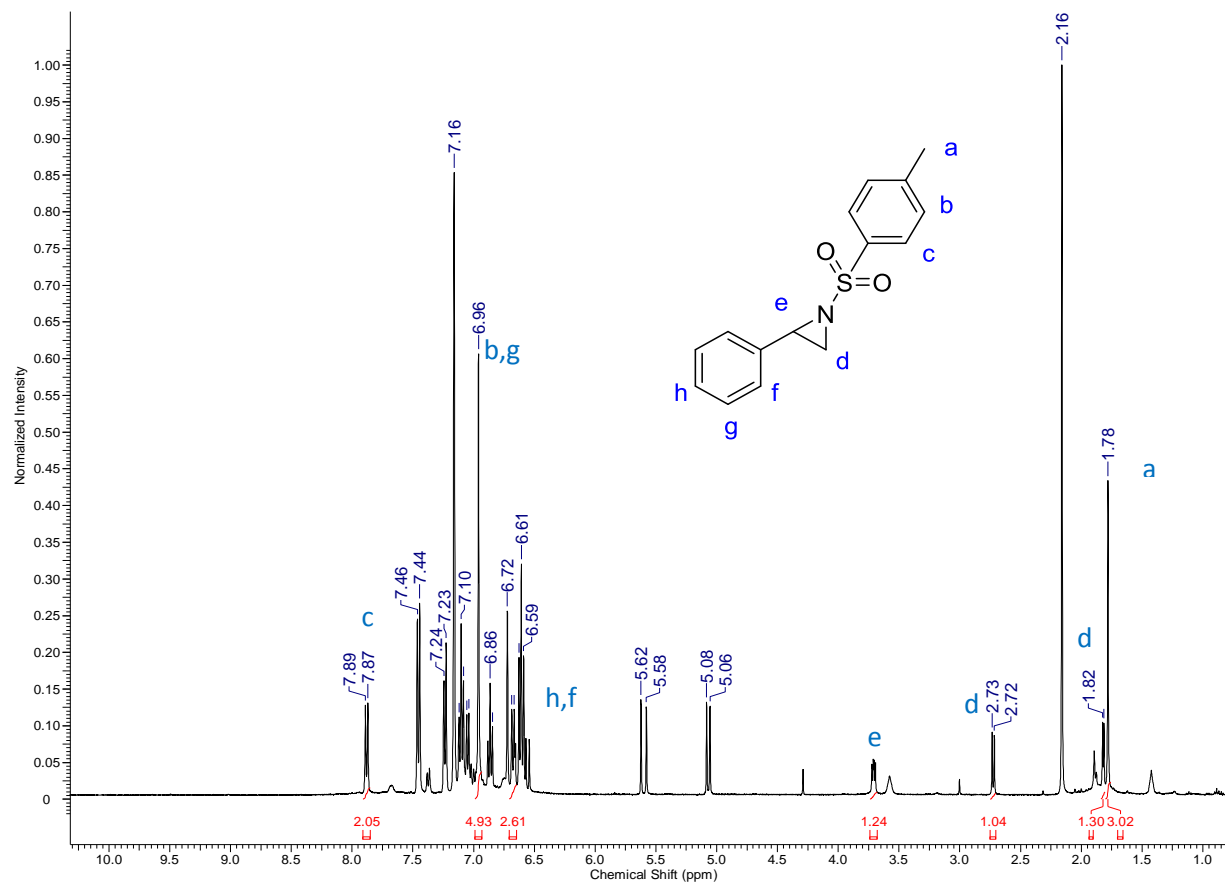

**Figure S15.**  $^1\text{H}$  NMR demonstrating catalytic formation of 2-phenyl-1-tosylaziridine by  $\text{Fe}[\text{O-terphenyl-O}]^{\text{Ph}}(\text{THF})_2$  (**1**). The peak at 2.16 ppm corresponds to the mesitylene standard. 10.4 mg (0.012 mmol) of  $\text{Fe}[\text{O-terphenyl-O}]^{\text{Ph}}(\text{THF})_2$  was reacted with 47.8 mg (0.13 mmol) of PhINTs and 13.4 mg (0.13 mmol) of styrene.

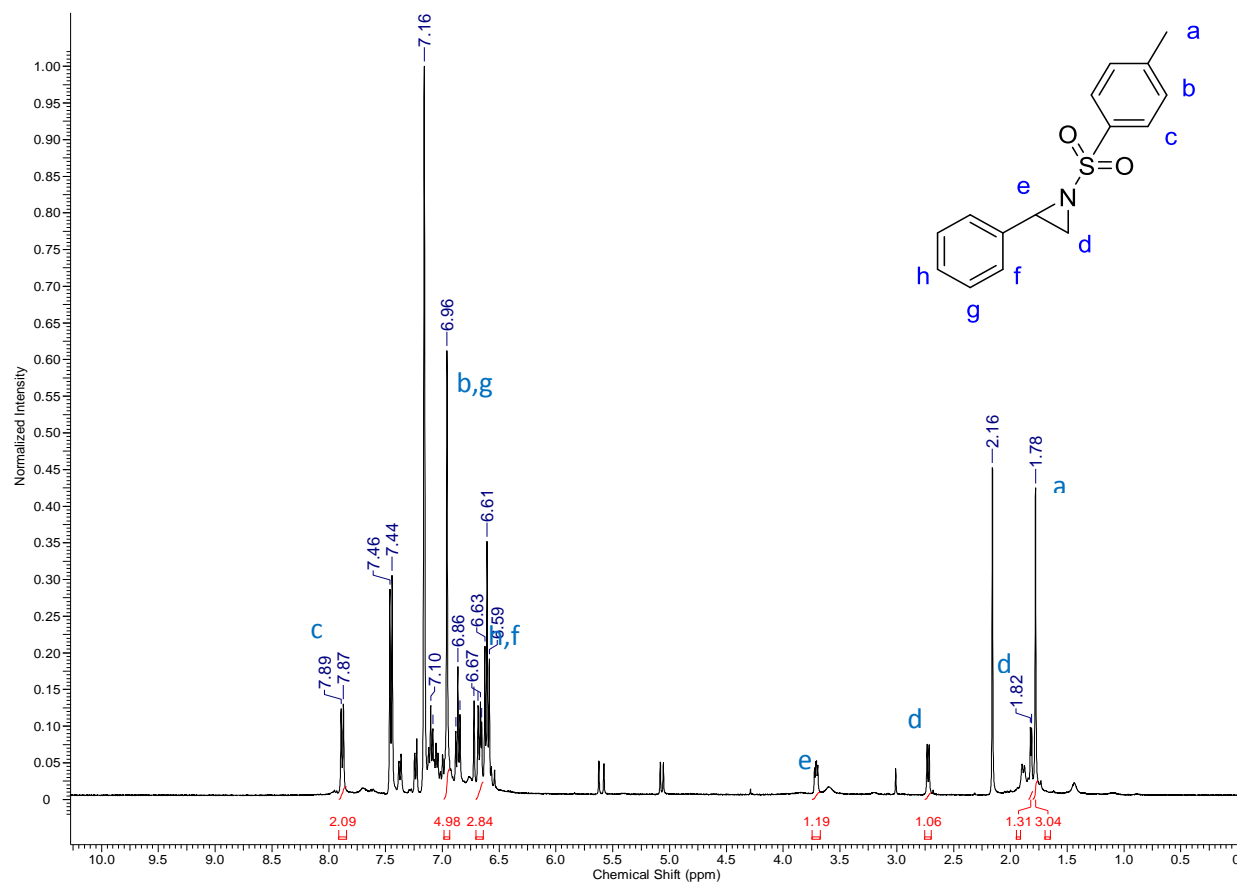

**Figure S16.** <sup>1</sup>H NMR demonstrating catalytic formation of 2-phenyl-1-tosylaziridine by Mn[O-terphenyl-O]<sup>Ph</sup>(THF)<sub>2</sub> (**2**). The peak at 2.16 ppm corresponds to mesitylene standard. 10.3 mg (0.012 mmol) of Mn[O-terphenyl-O]<sup>Ph</sup>(THF)<sub>2</sub> was reacted with 47.6 mg (0.13 mmol) of PhINTs and 13.2 mg (0.13 mmol) of styrene.

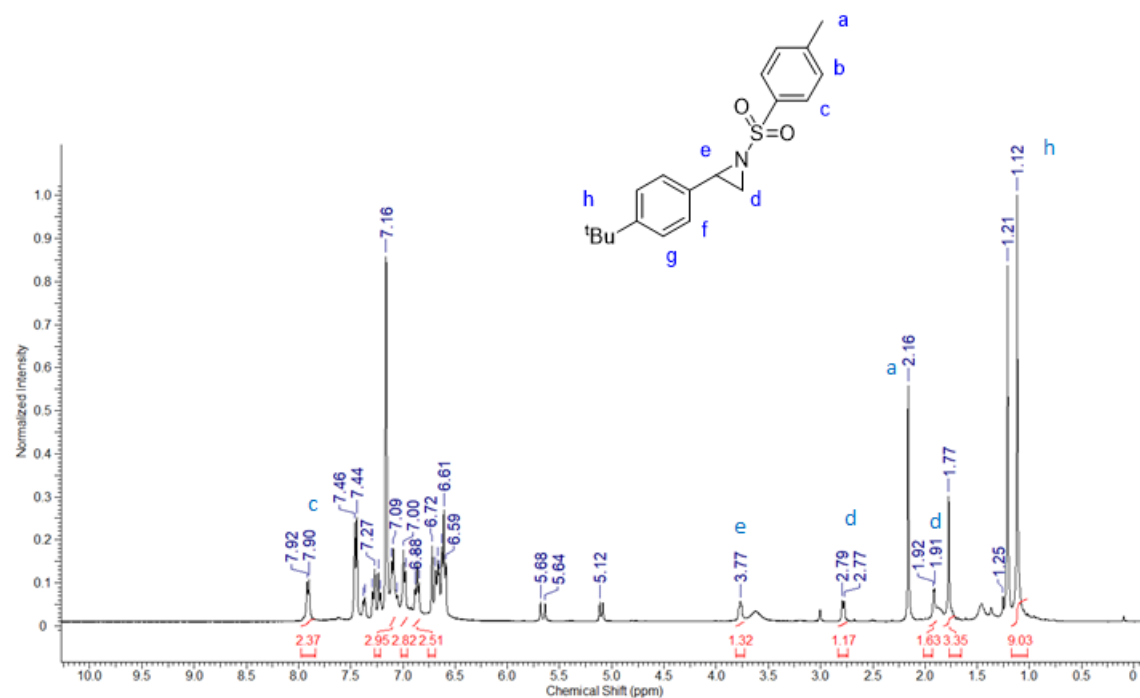

**Figure S17.**  $^1\text{H}$  NMR demonstrating catalytic formation of 2-(4-(tert-butyl)phenyl)-1-tosylaziridine. 10.2 mg (0.012 mmol) of  $\text{Mn}[\text{O-terphenyl-O}]^{\text{Ph}}(\text{THF})_2$  was reacted with 47.8 mg (0.13 mmol) of PhINTs and 20.4 mg (0.13 mmol) of 4-*tert*-butylstyrene

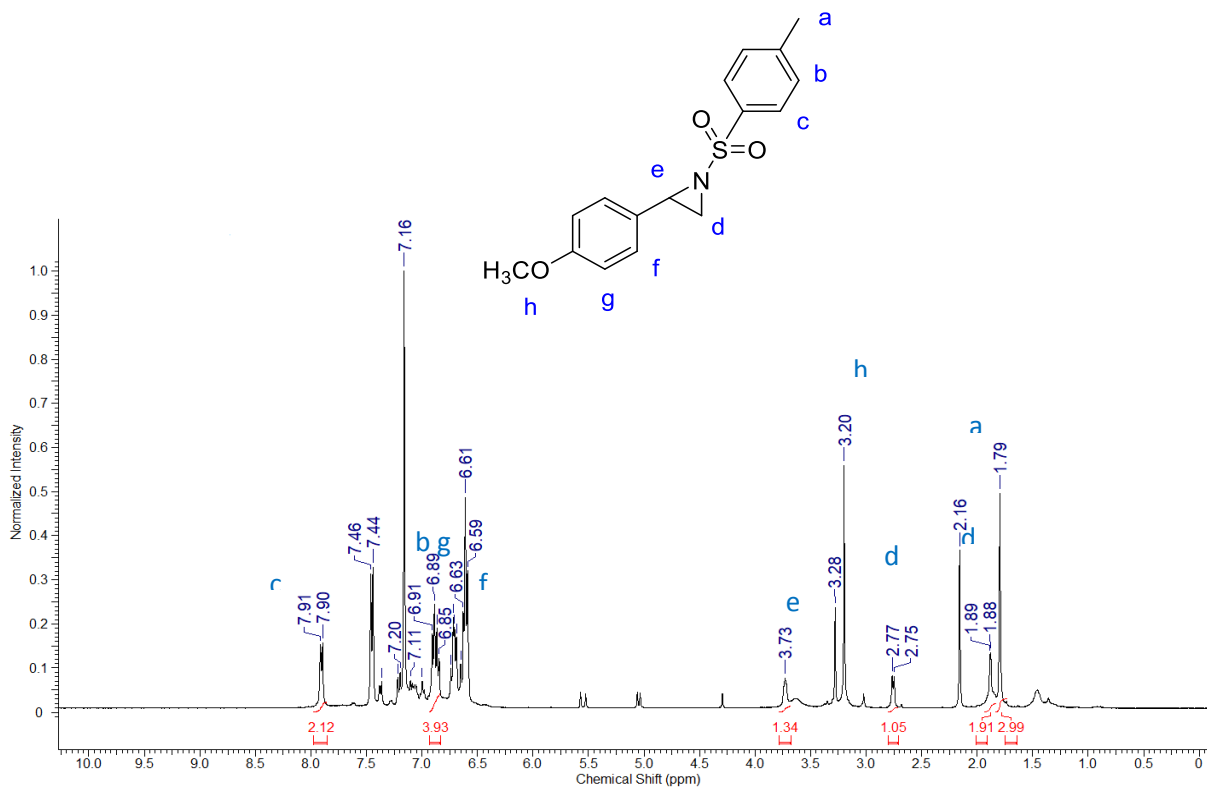

**Figure S18.** <sup>1</sup>H NMR demonstrating catalytic formation of 2-(4-methoxyphenyl)-1-tosylaziridine. 10.3 mg (0.012 mmol) of Mn[O-terphenyl-O]<sup>Ph</sup>(THF)<sub>2</sub> was reacted with 47.3 mg (0.13 mmol) of PhINTs and 16.4 mg (0.13 mmol) of 4-methoxystyrene.

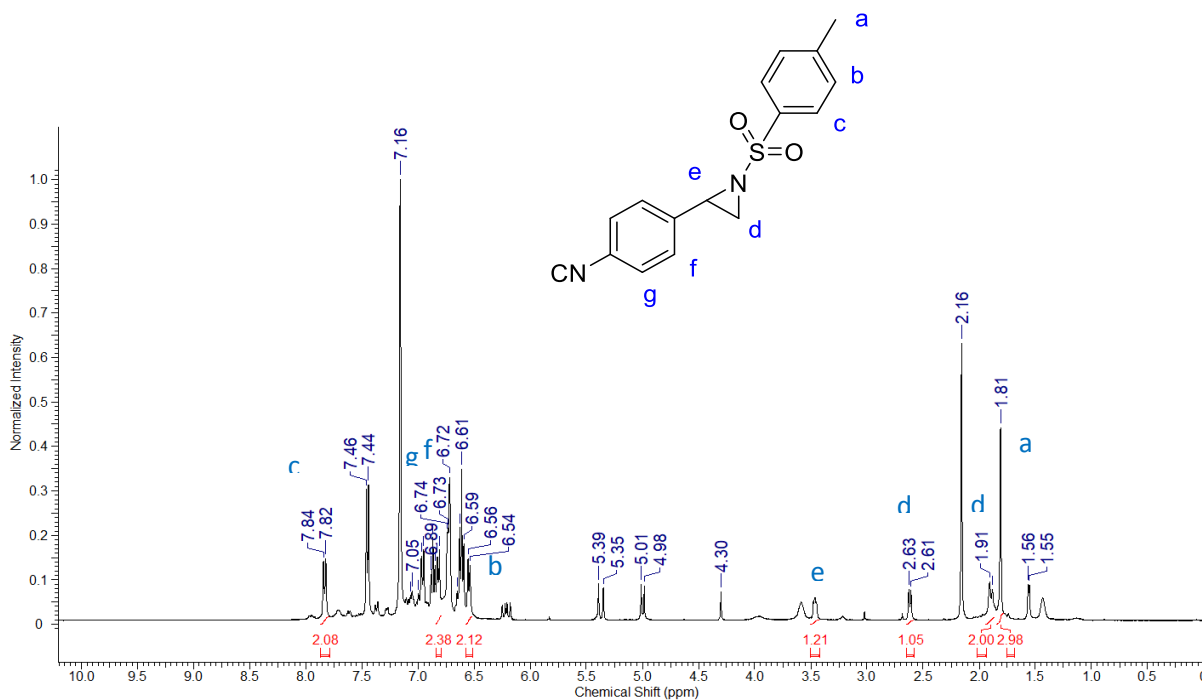

**Figure S19.**  $^1\text{H}$  NMR demonstrating catalytic formation of 2-(4-isocyanophenyl)-1-tosylaziridine. 10.7 mg (0.012 mmol) of  $\text{Mn}[\text{O-terphenyl-O}]^{\text{Ph}}(\text{THF})_2$  was reacted with 47.3mg (0.13 mmol) of PhINTs and 17.8 mg (0.13 mmol) of 4-cyanostyrene.

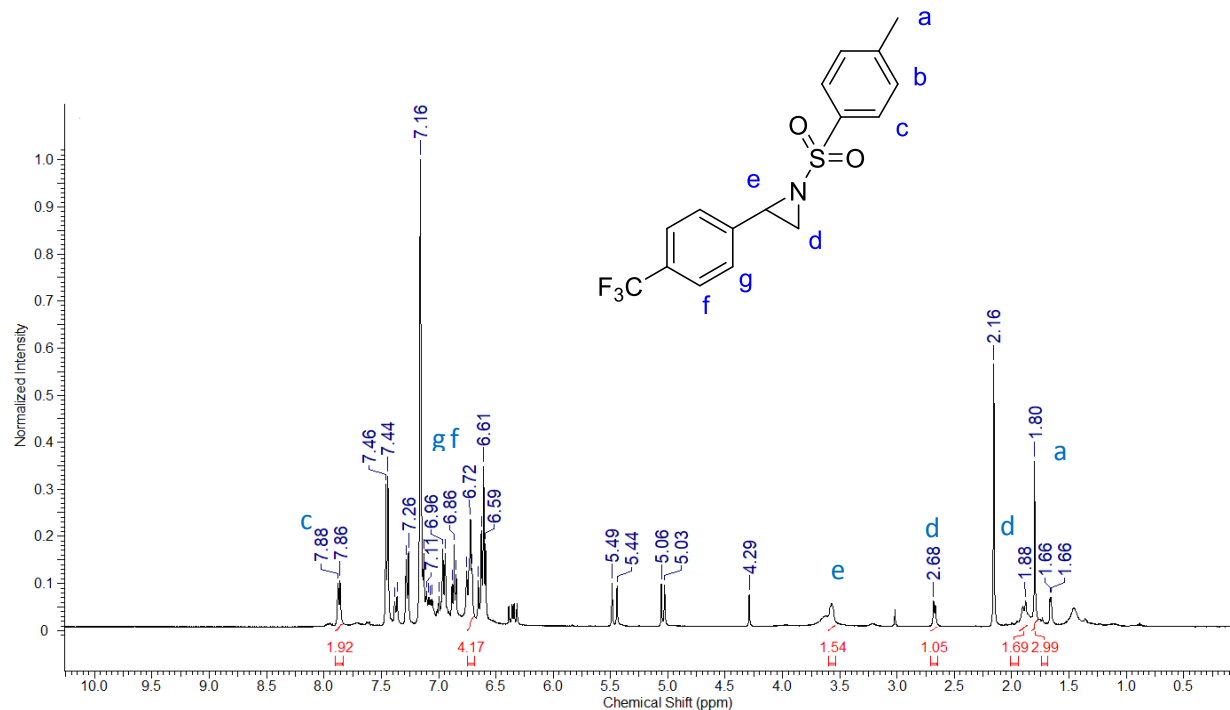

**Figure S20.** <sup>1</sup>H NMR demonstrating catalytic formation of 1-tosyl-2-(4-(trifluoromethyl)phenyl)aziridine. 10.5 mg (0.012 mmol) of Mn[O-terphenyl-O]<sup>Ph</sup>(THF)<sub>2</sub> was reacted with 47.8 mg (0.13 mmol) of PhINTs and 23.3 mg (0.13 mmol) of 4-trifluoromethyl styrene.

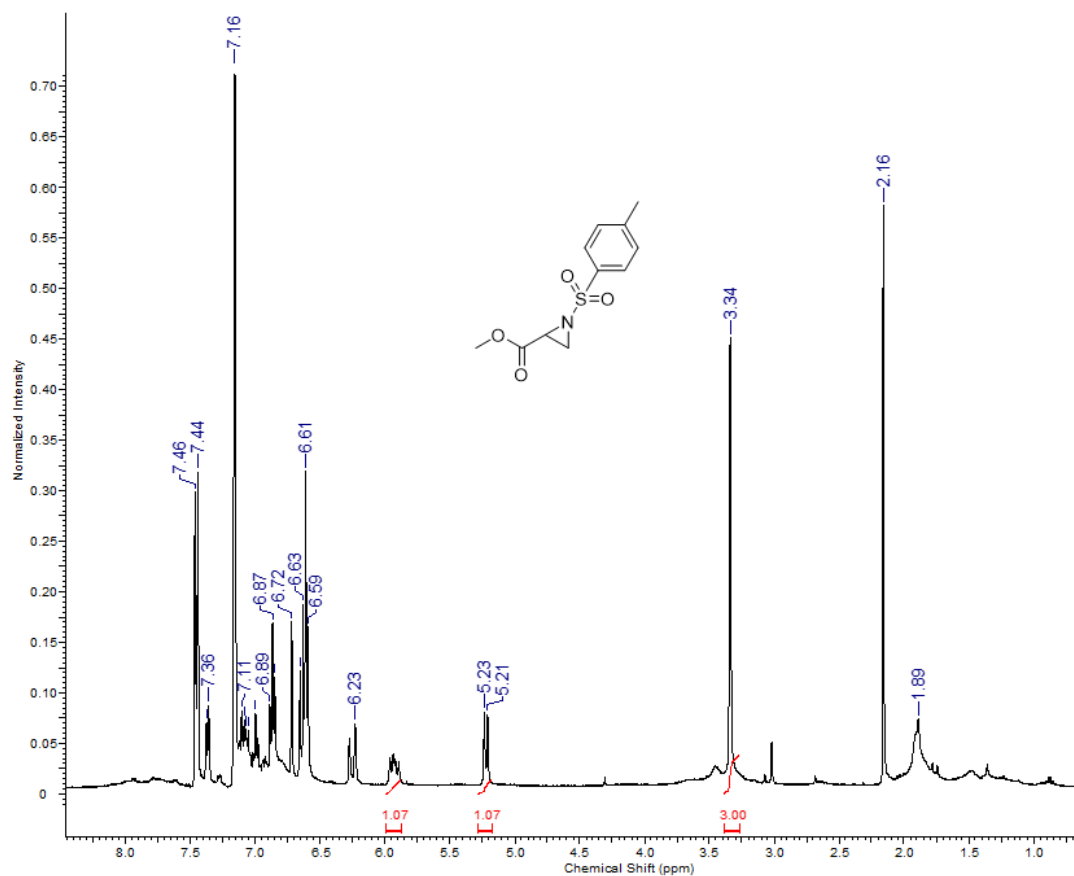

**Figure S21.**  $^1\text{H}$  NMR demonstrating no formation of methyl 1-tosylaziridine-2-carboxylate. 10.1 mg (0.012 mmol) of  $\text{Mn}[\text{O-terphenyl-O}]^{\text{Ph}}(\text{THF})_2$  was reacted with 47.6 mg (0.13 mmol) of PhINTs and 11.1 mg (0.13 mmol) of methyl acrylate.



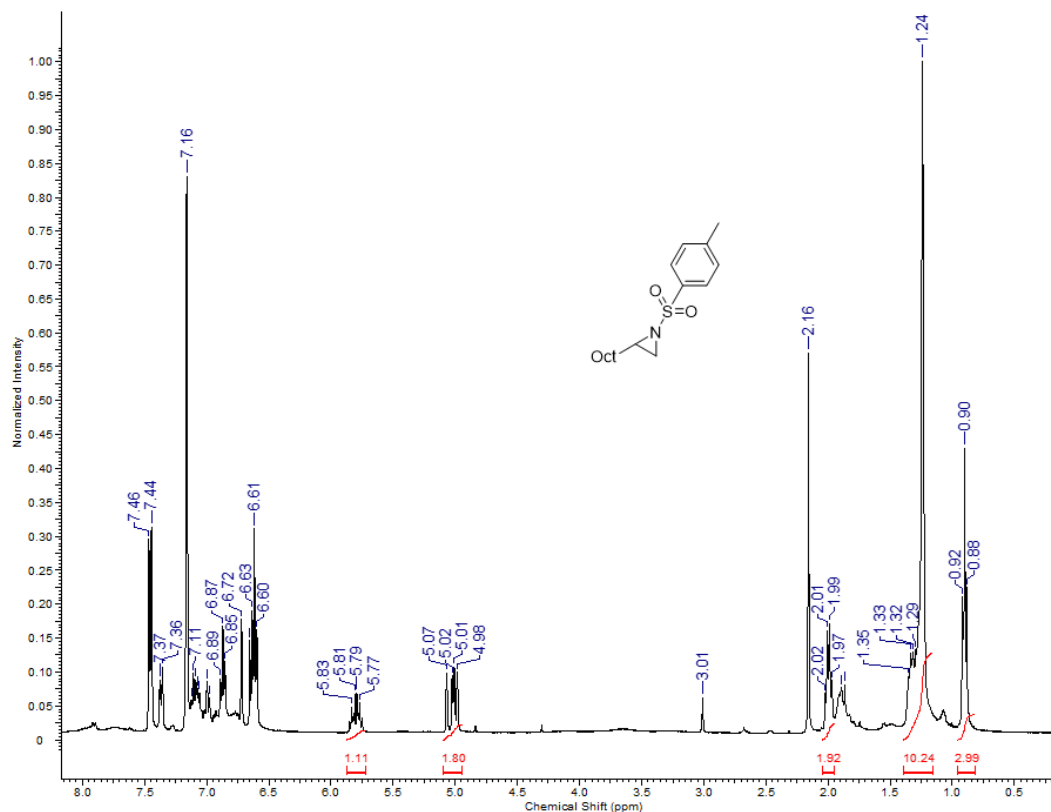

**Figure S22.** <sup>1</sup>H NMR demonstrating no formation of 1-(1-tosylaziridin-2-yl)octan-1-one. 10.4 mg (0.012 mmol) of Mn[O-terphenyl-O]<sup>Ph</sup>(THF)<sub>2</sub> was reacted with 47.8 mg (0.13 mmol) of PhINTs and 18.4 mg (0.13 mmol) of 1-decene.

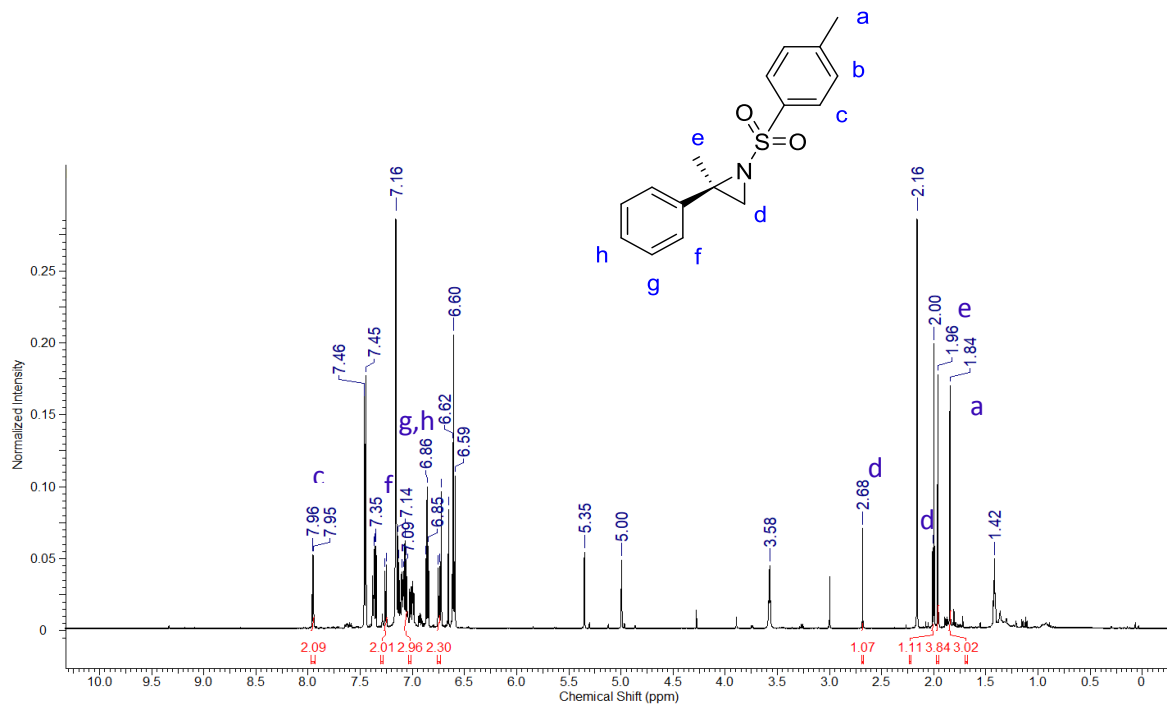

**Figure S23.** <sup>1</sup>H NMR demonstrating catalytic formation of 2-methyl-2-phenyl-1-tosylaziridine. 10.1 mg (0.012 mmol) of Mn[O-terphenyl-O]<sup>Ph</sup>(THF)<sub>2</sub> was reacted with 47.6 mg (0.13 mmol) of PhINTs and 15.1 mg (0.13 mmol) of α-methylstyrene.

### 3. GC-MS spectra

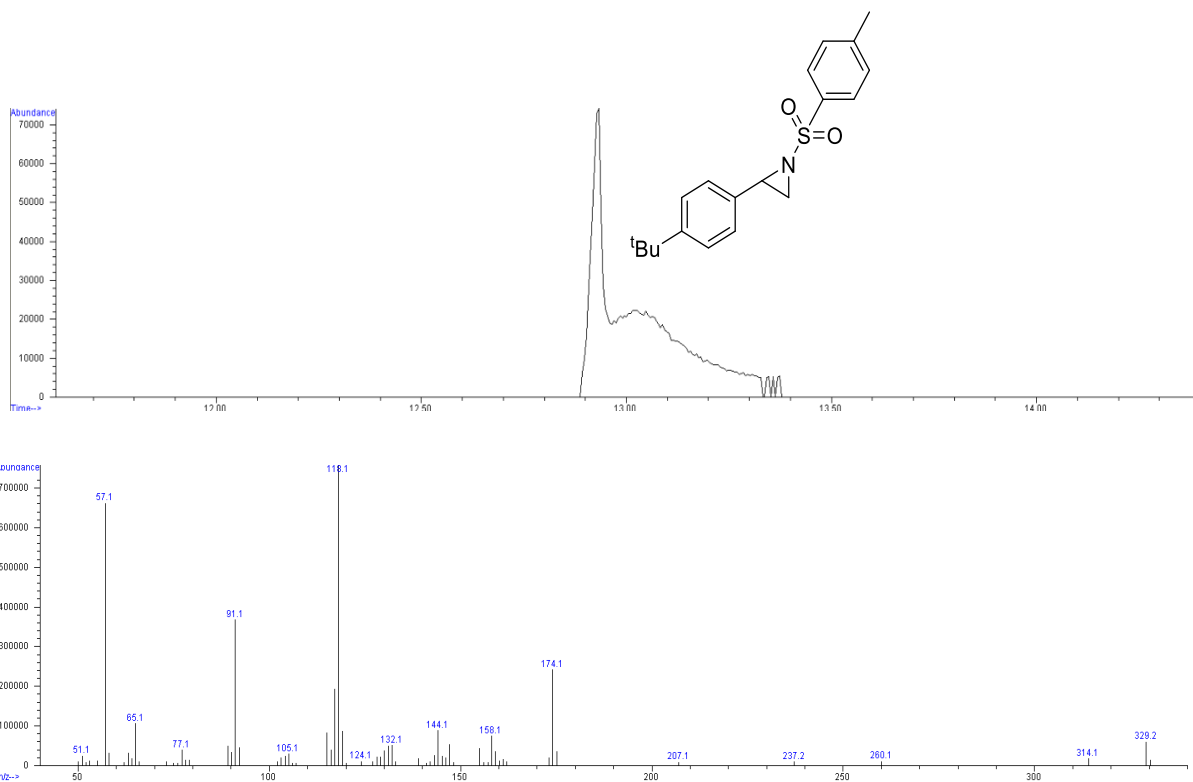

**Figure S24.** GC-MS of 2-(4-(tert-butyl)phenyl)-1-tosylaziridine.

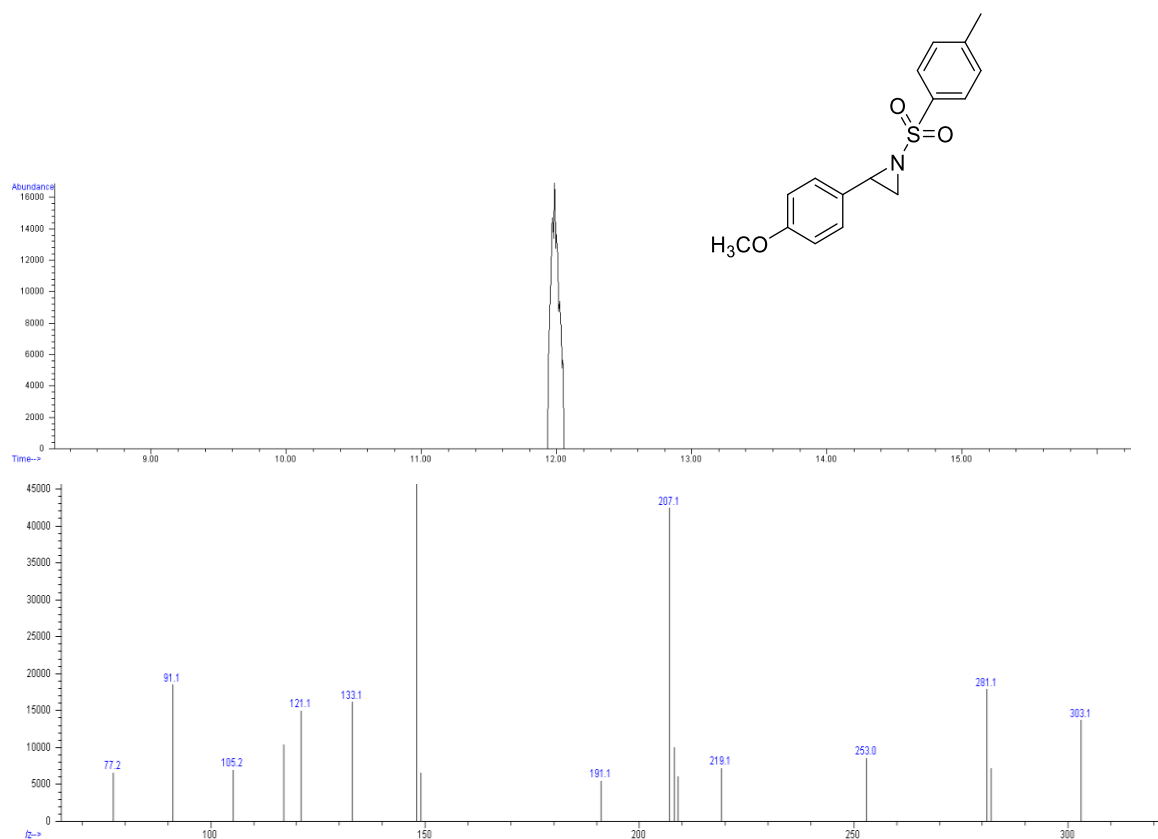

**Figure S25.** GC-MS of 2-(4-methoxyphenyl)-1-tosylaziridine.

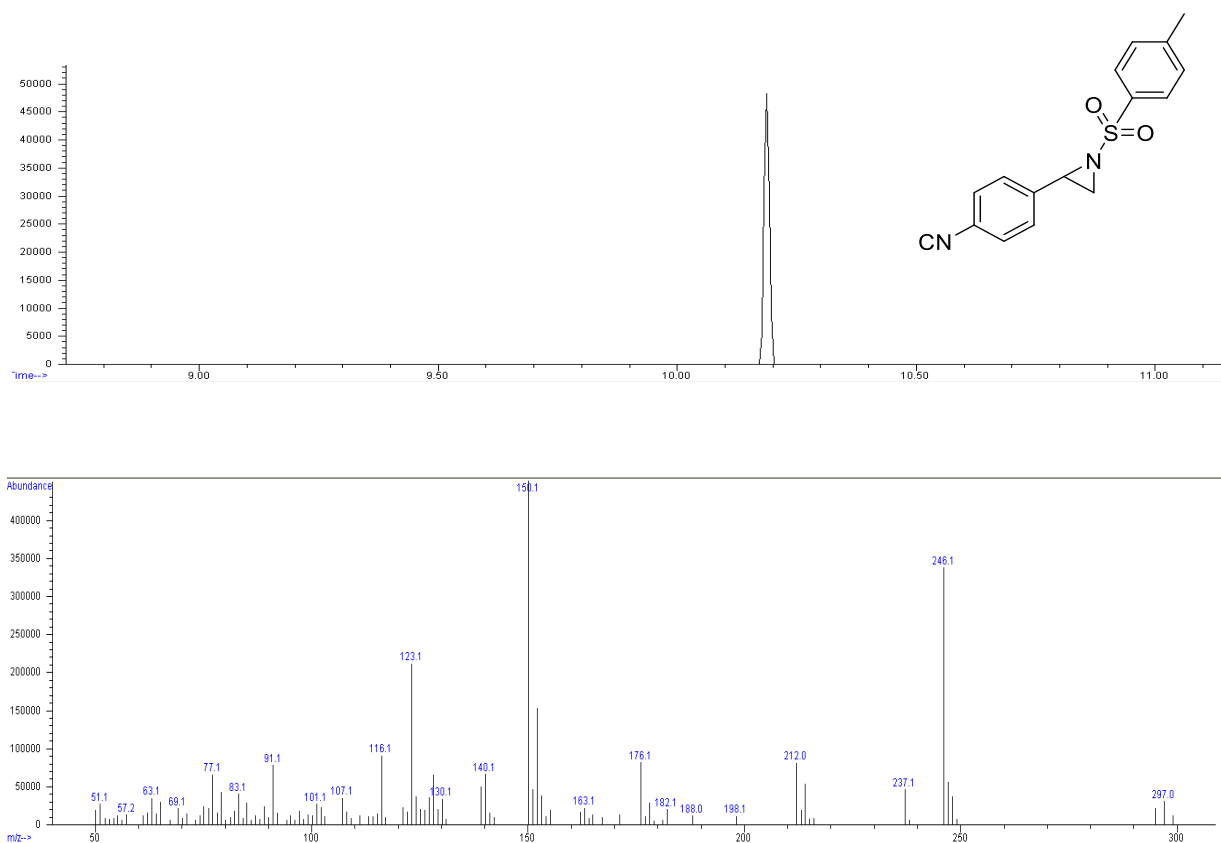

**Figure S26.** GC-MS of 2- (4-isocyanophenyl)-1-tosylaziridine.

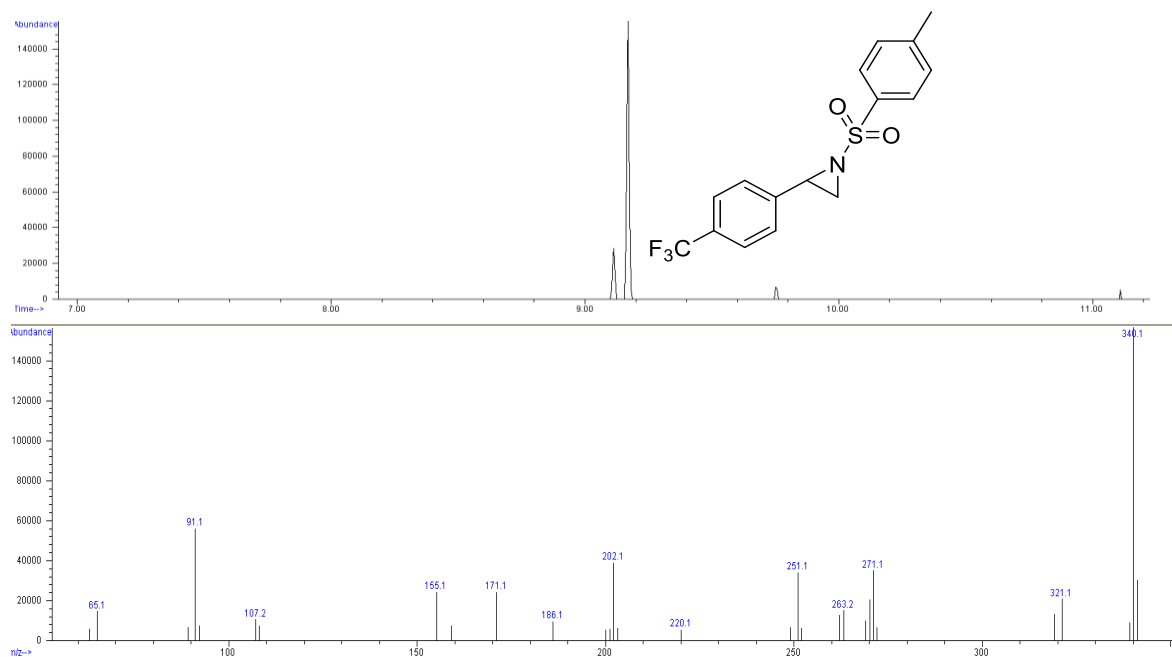

**Figure S27.** GC-MS of 1-tosyl-2-(4-(trifluoromethyl)phenyl)aziridine.

#### 4. Computational Data

All intermediates along the reaction pathway were probed as doublets, quartets, and sextets to allow for various combinations of  $\text{Mn}^{\text{II}}/\text{NR}^0$  to  $\text{Mn}^{\text{IV}}/\text{NR}^{2-}$ . Doublets were always higher in energy and are therefore only reported for the iminoiodinane/imido complexes. Multiple conformers of the tosyl substituent were probed (**Figure S28**) but the isomer with p-methyltoluene protruding into solution, and oxygen close to coordinating to Mn, was found to be lowest in energy for most structures (iso1). Different regio and stereoisomers were considered for the styrene added intermediate **C**. Unsurprisingly, the radical intermediate is significantly stabilized when localized on the secondary vs. primary carbon so we only present the former. We observe a stereochemical preference but that is due to our modeling only considering one possible conformation of the ligand backbone; in solution one expects a 50:50 mixture of these coordinations and therefore no stereoselectivity for one aziridine over another. Energies are summarized in Table S2, frequencies for optimized structures in Table S3, and all optimized structures can be found in the xyz file available in the Supporting Information.

**Figure S28.** Illustration of optimized structures of iso1 vs. iso2 for the iminoiodinane intermediate **A** that demonstrates the significant N-I activation.

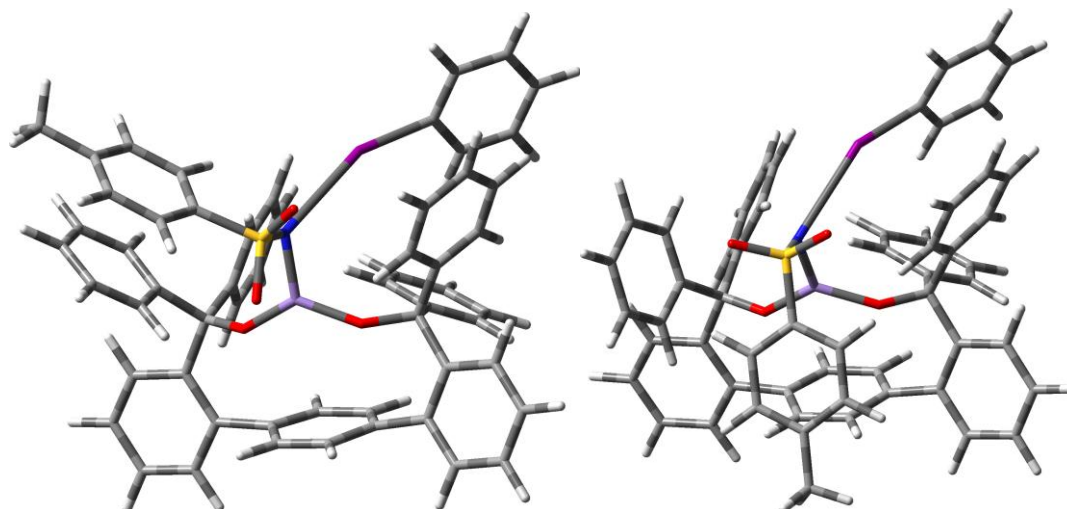

**Table S1.** Bond order analysis of iminoiodinane adducts (intermediate **A**).

| Structure | Spin State | Mayer | Wiberg | Bond Length (Å) |
|-----------|------------|-------|--------|-----------------|
| TsNIPh    | Singlet    | 1.05  | 1.27   | 2.059           |
| iso1      | Sextet     | 0.08  | 0.11   | 2.955           |
| iso2      | Sextet     | <0.05 | 0.05   | 3.173           |
| iso1      | Quartet    | 0.08  | 0.11   | 2.937           |
| iso2      | Quartet    | 0.05  | 0.07   | 3.096           |
| iso1      | Doublet    | 0.24  | 0.32   | 2.638           |
| iso2      | Doublet    | 0.10  | 0.12   | 3.001           |



**Figure S29.** Spin density isosurface plot (iso = 0.002 au) for the quartet iminoiodinane intermediate **A** (left) compared to the imido structure **B** (right).

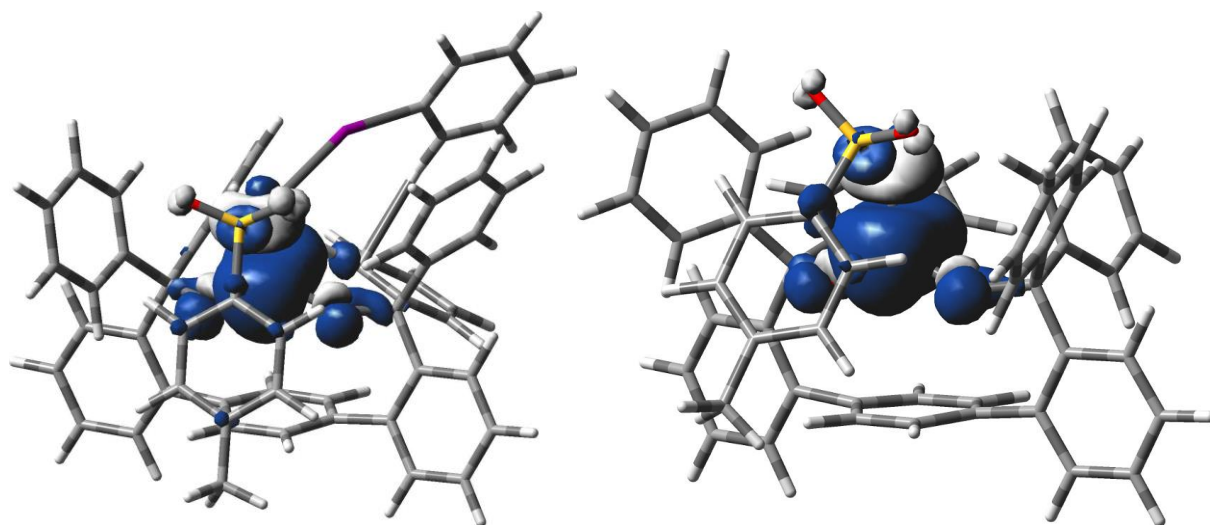

**Figure S30.** Spin density isosurface plot (iso = 0.002 au) for the sextet radical intermediate **C**.

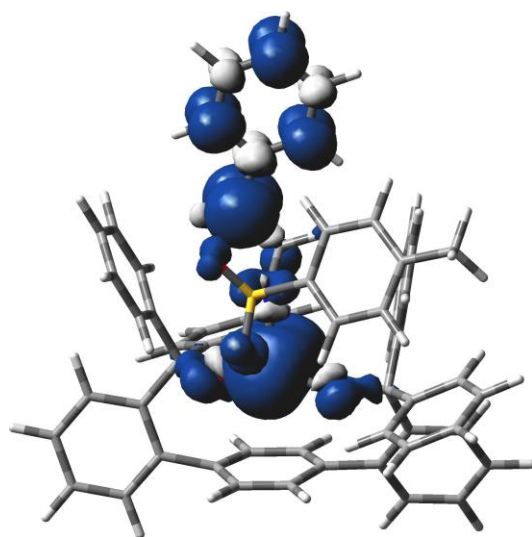

**Table S2.** Energies ( $E_h$ ) of optimized structures.

| Structure                                          | Spin State | $E_{DZ}$     | H(gas)       | G(gas)       | $E_{TZ}$     | CalcID  |
|----------------------------------------------------|------------|--------------|--------------|--------------|--------------|---------|
| Mn[O-terphenyl-O] <sup>Ph</sup> (THF) <sub>2</sub> | sextet     | -3461.041137 | -3460.148207 | -3460.290597 | -3463.563386 | TMn001  |
| Mn[O-terphenyl-O] <sup>Ph</sup>                    | sextet     | -2996.384408 | -2995.735497 | -2995.847667 | -2997.846798 | TMn011  |
| THF                                                | singlet    | -232.286460  | -232.167475  | -232.202388  | -232.556602  | THF     |
| styrene                                            | singlet    | -309.443171  | -309.305840  | -309.345084  | -309.789589  | STYRENE |
| iminoiodinane                                      | singlet    | -1403.138896 | -1402.904865 | -1402.975783 | -1404.046199 | NI001   |
| phenyl iodide                                      | singlet    | -529.331578  | -529.237124  | -529.275943  | -529.556431  | PhI     |
| Int A, iso1                                        | doublet    | -4399.649153 | -4398.762715 | -4398.917982 | -4402.474009 | MN053   |
| Int A, iso2                                        | doublet    | -4399.631578 | -4398.745641 | -4398.899749 | -4402.492884 | MN053r  |
| Int A, iso1                                        | quartet    | -4399.662672 | -4398.776403 | -4398.931406 | -4402.506212 | MN052   |
| Int A, iso2                                        | quartet    | -4399.659462 | -4398.773032 | -4398.928220 | -4402.506047 | MN052r  |
| Int A, iso1                                        | sextet     | -4399.631843 | -4398.746679 | -4398.902621 | -4402.487853 | MN051   |
| Int A, iso2                                        | sextet     | -4399.640583 | -4398.753818 | -4398.905761 | -4402.472309 | MN051r  |
| Int B, iso1                                        | doublet    | -3870.277419 | -3869.486997 | -3869.621762 | -3872.897459 | MN001c  |
| Int B, iso2                                        | doublet    | -3870.273091 | -3869.483782 | -3869.618042 | -3872.893771 | MN007   |
| Int B, iso1                                        | quartet    | -3870.299026 | -3869.509280 | -3869.646668 | -3872.930194 | MN003   |
| Int B, iso2                                        | quartet    | -3870.299026 | -3869.509280 | -3869.646664 | -3872.930199 | MN009   |
| Int B, iso1                                        | sextet     | -3870.263480 | -3869.474234 | -3869.613205 | -3872.913423 | MN005   |
| Int B, iso2                                        | sextet     | -3870.265795 | -3869.476685 | -3869.612464 | -3872.912177 | MN010   |
| Int C, iso1a                                       | quartet    | -4179.779563 | -4178.849613 | -4179.002265 | -4182.764078 | MN070   |
| Int C, iso1b                                       | quartet    | -4179.783999 | -4178.853949 | -4179.003699 | -4182.767982 | MN071   |
| Int C, iso2a                                       | quartet    | -4179.773237 | -4178.843269 | -4178.992751 | -4182.753899 | MN074   |
| Int C, iso2b                                       | quartet    | -4179.776399 | -4178.845745 | -4179.000252 | -4182.759573 | MN075   |
| Int C, iso1a                                       | sextet     | -4179.780050 | -4178.850119 | -4179.002640 | -4182.763915 | MN081   |
| Int C, iso1b                                       | sextet     | -4179.784474 | -4178.854482 | -4179.004823 | -4182.768680 | MN082   |
| Int C, iso2a                                       | sextet     | -4179.774368 | -4178.843415 | -4178.996950 | -4182.756144 | MN083   |
| Int C, iso2b                                       | sextet     | -4179.776853 | -4178.846215 | -4179.001427 | -4182.760079 | MN084   |
| Int D, iso1a                                       | quartet    | -4179.806978 | -4178.877649 | -4179.027699 | -4182.743518 | MN096   |
| Int D, iso1b                                       | quartet    | -4179.772736 | -4178.842644 | -4178.995269 | -4182.731312 | MN097a  |
| Int D, iso2a                                       | quartet    | -4179.778261 | -4178.847567 | -4179.000951 | -4182.734473 | MN098a  |
| Int D, iso2b                                       | quartet    | -4179.783594 | -4178.852476 | -4179.006539 | -4182.736723 | MN101a  |
| Int D, iso1a                                       | sextet     | -4179.783719 | -4178.853933 | -4179.002466 | -4182.781443 | MN102a  |
| Int D, iso1b                                       | sextet     | -4179.785494 | -4178.854303 | -4179.009623 | -4182.782628 | MN103   |
| Int D, iso2a                                       | sextet     | -4179.787670 | -4178.855546 | -4179.011336 | -4182.782685 | MN104a  |
| Int D, iso2b                                       | sextet     | -4179.802928 | -4178.871272 | -4179.019191 | -4182.793530 | MN105   |
| TS B-C-1a                                          | quartet    | -4179.757455 | -4178.828611 | -4178.982555 | -4182.733288 | MN086c  |
| TS B-C-1b                                          | quartet    | -4179.758117 | -4178.830076 | -4178.981401 | -4182.733707 | MN087c  |
| TS B-C-2a                                          | quartet    | -4179.757455 | -4178.828611 | -4178.982544 | -4182.708880 | MN090   |
| TS B-C-2b                                          | quartet    | Not found    |              |              |              |         |
| TS C-D-1a                                          | sextet     | -4179.762197 | -4178.832815 | -4178.988421 | -4182.755034 | MN107   |
| TS C-D-1b                                          | sextet     | -4179.769756 | -4178.839943 | -4178.995690 | -4182.761341 | MN108   |
| TS C-D-2a                                          | sextet     | -4179.762197 | -4178.832815 | -4178.988416 | -4182.755034 | MN109   |
| TS C-D-2b                                          | sextet     | Not found    |              |              |              |         |

**Table S3.** Harmonic frequencies (cm<sup>-1</sup>) for all optimized species.

|                                                          |          |          |           |           |           |
|----------------------------------------------------------|----------|----------|-----------|-----------|-----------|
| ----                                                     |          |          | 988.1988  | 988.4934  | 988.9492  |
| Mn[O-terphenyl-O] <sup>Ph</sup> (THF) <sub>2</sub> S=5/2 |          |          | 1003.4239 | 1017.6000 | 1023.4052 |
| ----                                                     |          |          | 1024.3634 | 1025.1462 | 1026.2600 |
| 9.2000                                                   | 20.9668  | 22.0465  | 1027.0989 | 1030.1707 | 1036.3319 |
| 28.8956                                                  | 34.7278  | 40.2600  | 1039.0028 | 1047.4073 | 1050.3893 |
| 46.0689                                                  | 46.3864  | 49.4737  | 1064.7354 | 1065.8590 | 1069.7405 |
| 54.8332                                                  | 55.1763  | 58.1343  | 1072.1077 | 1089.4604 | 1094.3597 |
| 58.9869                                                  | 62.5056  | 66.0156  | 1097.3175 | 1097.5903 | 1100.9604 |
| 71.1429                                                  | 73.0233  | 77.8753  | 1119.1332 | 1122.4945 | 1131.6737 |
| 79.4771                                                  | 84.2058  | 88.9656  | 1131.7547 | 1132.8231 | 1134.8272 |
| 95.5837                                                  | 102.2237 | 104.5877 | 1138.1416 | 1138.9363 | 1145.1995 |
| 109.1053                                                 | 111.3691 | 114.9244 | 1146.6656 | 1147.4900 | 1151.6046 |
| 127.0872                                                 | 128.5950 | 153.3502 | 1153.9054 | 1157.3247 | 1158.8088 |
| 160.2724                                                 | 170.7235 | 176.4309 | 1159.6812 | 1160.9894 | 1170.3701 |
| 185.3630                                                 | 189.9206 | 204.3726 | 1170.8772 | 1171.9200 | 1180.2159 |
| 206.5484                                                 | 211.2393 | 215.3347 | 1184.9723 | 1186.0064 | 1203.8237 |
| 224.4755                                                 | 228.0759 | 248.6428 | 1209.7006 | 1211.2140 | 1221.1308 |
| 253.7147                                                 | 263.3846 | 264.7686 | 1239.7136 | 1240.4708 | 1257.8323 |
| 268.6375                                                 | 277.1827 | 286.5812 | 1261.6530 | 1262.1111 | 1263.6446 |
| 292.2693                                                 | 313.3784 | 320.7744 | 1275.6565 | 1277.6978 | 1280.0683 |
| 323.5420                                                 | 328.2481 | 349.6937 | 1280.7188 | 1283.8674 | 1287.9446 |
| 372.5212                                                 | 377.4955 | 391.2472 | 1290.8066 | 1311.6389 | 1312.6030 |
| 399.1986                                                 | 400.6490 | 401.1857 | 1323.6840 | 1332.5594 | 1338.1677 |
| 406.2680                                                 | 409.3219 | 425.0467 | 1346.4527 | 1350.2850 | 1366.3671 |
| 464.5212                                                 | 468.6195 | 485.8977 | 1367.8341 | 1368.4209 | 1369.6903 |
| 503.0494                                                 | 507.9839 | 518.3112 | 1398.5325 | 1403.1158 | 1408.9522 |
| 521.4083                                                 | 537.8215 | 551.8968 | 1413.5901 | 1418.9096 | 1421.7829 |
| 559.6157                                                 | 576.1525 | 611.6846 | 1424.2499 | 1424.8756 | 1427.8647 |
| 613.1803                                                 | 613.2791 | 613.8400 | 1429.3397 | 1430.8801 | 1430.9689 |
| 614.4043                                                 | 622.8895 | 627.3468 | 1444.3922 | 1448.9011 | 1457.5258 |
| 630.0558                                                 | 634.2371 | 635.0661 | 1459.5634 | 1468.6922 | 1469.6911 |
| 635.2081                                                 | 636.9559 | 641.9938 | 1469.9678 | 1470.3900 | 1474.3751 |
| 653.1882                                                 | 674.6935 | 688.1141 | 1507.4997 | 1550.1446 | 1575.2682 |
| 696.3562                                                 | 698.9776 | 700.8635 | 1577.8910 | 1588.8529 | 1589.4902 |
| 705.0728                                                 | 708.1509 | 722.7722 | 1591.4390 | 1591.7524 | 1602.9643 |
| 728.9069                                                 | 746.1303 | 748.3091 | 1604.6110 | 1605.2615 | 1605.3766 |
| 750.8386                                                 | 757.3808 | 761.1339 | 1609.0173 | 1609.1301 | 1614.8856 |
| 770.3162                                                 | 775.1270 | 776.7093 | 2933.3591 | 2938.0428 | 2942.8517 |
| 782.1179                                                 | 787.8028 | 819.1159 | 2977.6595 | 2986.5322 | 2995.4564 |
| 824.9183                                                 | 829.6956 | 831.4784 | 2998.2755 | 3006.4041 | 3037.3766 |
| 832.5522                                                 | 834.5272 | 836.7346 | 3046.8146 | 3049.5727 | 3052.5867 |
| 843.6649                                                 | 847.5683 | 864.0223 | 3056.9400 | 3061.8463 | 3066.6451 |
| 866.0901                                                 | 873.0301 | 882.7979 | 3083.8369 | 3089.7413 | 3090.1000 |
| 886.9638                                                 | 891.5778 | 894.7630 | 3090.2305 | 3090.7835 | 3092.7064 |
| 896.2489                                                 | 901.9898 | 905.1941 | 3093.5736 | 3094.8393 | 3099.0998 |
| 913.4030                                                 | 918.3063 | 926.1638 | 3099.7787 | 3100.0516 | 3101.3055 |
| 928.8037                                                 | 930.7070 | 931.2831 | 3101.9744 | 3102.5473 | 3105.9149 |
| 935.8382                                                 | 936.4896 | 941.2528 | 3110.3040 | 3112.0153 | 3113.3008 |
| 945.4949                                                 | 946.4260 | 957.8841 | 3114.0153 | 3114.2078 | 3114.3678 |
| 958.2452                                                 | 958.7610 | 961.7380 | 3119.9357 | 3120.0686 | 3121.1953 |
| 968.3556                                                 | 975.4496 | 975.5518 | 3121.6421 | 3121.8770 | 3122.4242 |
| 977.6263                                                 | 978.5585 | 981.1603 | 3123.5601 | 3124.5196 | 3125.8869 |
| 984.2706                                                 | 986.5347 | 987.6526 | 3128.6512 | 3134.9460 | 3149.6856 |

----

Mn[O-terphenyl-O]<sup>Ph</sup> S=5/2

----

|           |           |           |
|-----------|-----------|-----------|
| -7.8539   | 20.2536   | 24.4368   |
| 29.9701   | 33.2058   | 38.0719   |
| 44.0095   | 48.0270   | 52.1166   |
| 59.8226   | 60.1274   | 66.7479   |
| 72.9954   | 78.2408   | 82.9870   |
| 89.8892   | 91.8971   | 107.4082  |
| 108.4923  | 134.9757  | 170.2403  |
| 174.8145  | 199.7497  | 203.4942  |
| 214.1667  | 227.2484  | 235.6649  |
| 249.2635  | 253.4672  | 262.4283  |
| 266.5985  | 270.5191  | 293.0300  |
| 295.1732  | 307.9139  | 317.3698  |
| 323.0906  | 347.0099  | 364.1691  |
| 387.7918  | 398.9407  | 401.1819  |
| 402.0115  | 405.4042  | 406.6632  |
| 408.5512  | 427.9750  | 461.7181  |
| 481.5882  | 497.8731  | 502.4823  |
| 506.5800  | 520.5164  | 533.7534  |
| 542.0828  | 552.8436  | 575.4267  |
| 610.7104  | 612.6329  | 612.8871  |
| 613.3176  | 615.0090  | 623.7452  |
| 628.7578  | 632.0748  | 634.1816  |
| 635.8795  | 650.2137  | 660.5221  |
| 693.5114  | 699.1476  | 701.3076  |
| 706.0975  | 708.6870  | 709.3701  |
| 718.0681  | 728.0705  | 747.8249  |
| 748.9101  | 751.2795  | 757.6440  |
| 760.5192  | 765.0138  | 769.0754  |
| 780.9009  | 784.1290  | 826.0619  |
| 833.0210  | 833.8381  | 835.9014  |
| 836.7893  | 839.5813  | 864.4821  |
| 866.9123  | 885.0579  | 889.2579  |
| 900.9948  | 902.0390  | 924.8862  |
| 925.9020  | 929.5427  | 931.8286  |
| 941.0832  | 946.7395  | 947.0772  |
| 956.3275  | 958.2940  | 961.3376  |
| 962.3243  | 963.1432  | 978.6429  |
| 979.2523  | 980.6473  | 981.1812  |
| 981.8580  | 982.1496  | 986.7867  |
| 987.2825  | 988.3413  | 988.8942  |
| 990.4233  | 1001.1016 | 1020.5330 |
| 1022.5270 | 1023.7218 | 1023.8885 |
| 1024.7832 | 1045.1772 | 1051.3694 |
| 1056.2735 | 1061.8543 | 1065.6853 |
| 1066.9220 | 1081.3838 | 1087.4886 |
| 1095.9055 | 1097.5667 | 1104.0150 |
| 1130.1510 | 1132.3858 | 1132.6584 |
| 1134.9295 | 1139.3583 | 1140.9878 |
| 1144.0292 | 1145.8975 | 1148.1404 |
| 1149.7408 | 1154.3970 | 1155.1045 |
| 1155.9075 | 1171.1530 | 1174.6077 |
| 1181.9561 | 1186.5620 | 1241.8481 |
| 1243.8184 | 1260.7639 | 1269.9508 |

|           |           |           |
|-----------|-----------|-----------|
| 1275.5906 | 1278.8172 | 1280.0008 |
| 1281.1141 | 1281.1637 | 1315.8762 |
| 1342.6981 | 1344.2740 | 1365.8597 |
| 1367.7268 | 1369.1763 | 1369.9754 |
| 1387.1118 | 1420.9562 | 1423.1930 |
| 1427.1272 | 1429.4341 | 1430.9470 |
| 1431.3710 | 1455.4734 | 1467.0573 |
| 1467.2863 | 1468.7877 | 1471.1040 |
| 1471.5830 | 1502.0290 | 1539.6461 |
| 1575.5899 | 1576.2110 | 1585.7083 |
| 1590.4739 | 1592.4670 | 1593.4080 |
| 1600.8249 | 1602.2559 | 1603.7629 |
| 1606.0006 | 1607.0985 | 1610.0748 |
| 1610.2519 | 3088.0211 | 3091.7458 |
| 3092.1123 | 3094.8235 | 3095.3987 |
| 3096.5884 | 3098.5900 | 3099.3284 |
| 3101.1362 | 3104.7652 | 3104.7860 |
| 3104.8416 | 3107.8274 | 3109.2528 |
| 3109.2752 | 3110.6114 | 3112.9812 |
| 3115.4241 | 3117.9940 | 3118.1452 |
| 3118.6182 | 3118.9806 | 3119.2929 |
| 3119.9572 | 3123.4148 | 3127.0093 |
| 3128.5777 | 3129.6510 | 3130.0878 |
| 3131.3531 | 3133.1764 | 3149.9038 |

----

THF

----

|           |           |           |
|-----------|-----------|-----------|
| 27.3299   | 285.3752  | 625.3634  |
| 631.7082  | 777.3086  | 843.0881  |
| 889.0967  | 911.2069  | 920.8268  |
| 947.7493  | 1019.6673 | 1082.4992 |
| 1106.5438 | 1165.4697 | 1180.7922 |
| 1208.5441 | 1219.9073 | 1254.8415 |
| 1257.7666 | 1304.5884 | 1342.7297 |
| 1410.5493 | 1430.7812 | 1434.6309 |
| 1452.2788 | 2867.2564 | 2873.9463 |
| 2988.0998 | 2996.7635 | 3026.4858 |
| 3030.3846 | 3039.7599 | 3054.1798 |

----

Styrene

----

|           |           |           |
|-----------|-----------|-----------|
| 57.1616   | 202.1538  | 225.1465  |
| 399.5985  | 435.3862  | 436.4051  |
| 542.8759  | 613.0843  | 637.2438  |
| 691.1673  | 771.1974  | 782.7596  |
| 824.9379  | 881.8509  | 906.9135  |
| 957.8674  | 978.5592  | 983.4224  |
| 995.0820  | 1001.0831 | 1024.8042 |
| 1075.2363 | 1136.1067 | 1154.9412 |
| 1200.7128 | 1271.0551 | 1295.6777 |
| 1364.4565 | 1389.1374 | 1434.9566 |
| 1479.8884 | 1583.2226 | 1612.0618 |
| 1649.1112 | 3060.7886 | 3071.4360 |
| 3090.8993 | 3098.0701 | 3107.1183 |
| 3114.4175 | 3123.2718 | 3164.7351 |
| 57.1616   | 202.1538  | 225.1464  |

|               |           |           |                  |           |           |
|---------------|-----------|-----------|------------------|-----------|-----------|
| 399.5984      | 435.3862  | 436.4052  | 3122.0420        | 3128.3959 | 3131.1772 |
| 542.8759      | 613.0843  | 637.2437  | ----             |           |           |
| 691.1673      | 771.1974  | 782.7596  | Int A iso1 S=1/2 |           |           |
| 824.9380      | 881.8503  | 906.9137  | ----             |           |           |
| 957.8675      | 978.5592  | 983.4224  | 10.7722          | 14.0930   | 20.0574   |
| 995.0822      | 1001.0831 | 1024.8042 | 22.3736          | 30.0107   | 33.0367   |
| 1075.2363     | 1136.1067 | 1154.9413 | 34.5917          | 37.8124   | 40.4587   |
| 1200.7128     | 1271.0552 | 1295.6779 | 46.4894          | 47.2199   | 48.8434   |
| 1364.4563     | 1389.1370 | 1434.9566 | 51.7811          | 54.4542   | 58.7810   |
| 1479.8885     | 1583.2227 | 1612.0618 | 61.6898          | 63.2300   | 71.1019   |
| 1649.1112     | 3060.7885 | 3071.4360 | 72.0736          | 75.8003   | 80.7070   |
| 3090.8992     | 3098.0700 | 3107.1183 | 84.6801          | 90.5449   | 98.5994   |
| 3114.4175     | 3123.2718 | 3164.7352 | 102.5535         | 107.3838  | 109.2762  |
| ----          |           |           | 109.6463         | 117.2059  | 121.0773  |
| Iminoiodinane |           |           | 127.8597         | 137.6476  | 147.5417  |
| ----          |           |           | 163.2029         | 169.1885  | 174.8366  |
| 8.9633        | 17.4059   | 27.0923   | 183.5426         | 194.5975  | 205.6551  |
| 30.4017       | 35.2744   | 71.8769   | 210.8860         | 218.1687  | 220.2235  |
| 104.5429      | 128.2751  | 149.4215  | 239.0470         | 250.2782  | 254.2636  |
| 166.0458      | 212.9888  | 221.3328  | 258.6271         | 261.3655  | 265.4638  |
| 252.4172      | 261.5867  | 285.9374  | 267.7908         | 279.7747  | 286.1487  |
| 324.6471      | 340.2710  | 394.1676  | 289.1469         | 296.4241  | 312.4443  |
| 402.6955      | 405.4231  | 442.0799  | 320.1095         | 321.7941  | 329.1268  |
| 450.7936      | 512.2449  | 523.3951  | 339.2566         | 343.3485  | 352.6786  |
| 539.5338      | 596.6281  | 618.3134  | 369.7863         | 381.4211  | 392.3776  |
| 625.9308      | 638.1012  | 683.4047  | 395.8008         | 397.5462  | 401.3780  |
| 701.4447      | 721.2339  | 729.5870  | 401.5240         | 407.0085  | 409.1620  |
| 796.6356      | 800.4880  | 823.3990  | 416.8387         | 421.4960  | 423.4673  |
| 824.2208      | 906.7562  | 941.4804  | 441.8197         | 452.6157  | 464.4338  |
| 957.9627      | 958.4693  | 962.8073  | 473.6840         | 494.7642  | 496.8493  |
| 968.4793      | 996.4406  | 997.5810  | 501.2616         | 503.2362  | 509.1265  |
| 1010.7027     | 1011.3164 | 1036.0864 | 520.9439         | 527.8568  | 539.3359  |
| 1038.4387     | 1069.4297 | 1086.1270 | 541.6522         | 553.8271  | 580.3037  |
| 1090.9224     | 1138.3859 | 1150.2987 | 580.4908         | 604.7853  | 611.0411  |
| 1161.1524     | 1204.7098 | 1236.8459 | 611.9435         | 612.3527  | 613.7804  |
| 1262.1901     | 1289.1193 | 1343.2096 | 616.5793         | 622.5295  | 624.2962  |
| 1356.0697     | 1359.7499 | 1391.6045 | 631.2758         | 632.3592  | 634.3603  |
| 1408.1958     | 1421.0775 | 1425.5698 | 635.8078         | 646.3472  | 649.4184  |
| 1449.3092     | 1473.0299 | 1570.7312 | 664.0797         | 669.9256  | 689.6302  |
| 1583.3645     | 1592.1738 | 1607.1956 | 691.8790         | 697.7496  | 698.2943  |
| 2957.4071     | 3029.6614 | 3062.0675 | 701.5668         | 703.4199  | 711.4347  |
| 3068.3485     | 3094.7382 | 3095.9450 | 723.3561         | 723.9078  | 734.1706  |
| 3102.2805     | 3110.5702 | 3117.9509 | 738.4209         | 742.7412  | 746.8295  |
| 3127.7168     | 3128.5785 | 3129.8706 | 748.9010         | 753.8398  | 758.0924  |
| ----          |           |           | 763.9170         | 779.7999  | 783.5764  |
| PhI           |           |           | 786.7567         | 793.6147  | 806.2202  |
| ----          |           |           | 810.1060         | 815.6852  | 821.0428  |
| 145.5015      | 215.6894  | 261.3014  | 822.5006         | 823.6846  | 829.1020  |
| 398.4002      | 448.5712  | 602.5265  | 831.3191         | 832.8203  | 834.9312  |
| 647.8579      | 686.3160  | 721.4923  | 837.9833         | 858.6664  | 869.6421  |
| 814.6159      | 889.6011  | 952.8784  | 876.2435         | 888.0388  | 893.1991  |
| 972.5039      | 978.8148  | 1013.9153 | 899.5193         | 900.5995  | 917.3343  |
| 1046.8459     | 1061.3340 | 1135.9803 | 919.2438         | 922.4674  | 932.6387  |
| 1152.2738     | 1271.9733 | 1354.3551 | 932.8578         | 936.7597  | 942.8004  |
| 1421.8353     | 1448.7950 | 1581.1403 | 945.9827         | 950.0013  | 950.2866  |
| 1587.8650     | 3101.6178 | 3109.4325 | 950.7109         | 956.9412  | 957.6682  |

|           |           |           |
|-----------|-----------|-----------|
| 962.8839  | 964.7186  | 965.3947  |
| 975.2539  | 975.6274  | 976.4338  |
| 977.8416  | 978.5728  | 978.7008  |
| 979.3969  | 980.0355  | 983.1430  |
| 985.2330  | 988.3335  | 988.7785  |
| 990.1035  | 992.4160  | 998.3198  |
| 1005.5437 | 1008.9125 | 1014.0146 |
| 1023.5906 | 1025.3731 | 1025.8699 |
| 1026.6054 | 1032.1562 | 1038.8478 |
| 1046.9349 | 1048.8976 | 1053.6065 |
| 1061.0914 | 1073.1019 | 1074.0765 |
| 1075.6684 | 1078.0821 | 1090.3714 |
| 1092.1721 | 1095.2029 | 1097.4948 |
| 1099.1524 | 1133.1450 | 1133.5291 |
| 1134.5661 | 1135.3683 | 1136.4817 |
| 1138.5154 | 1140.0361 | 1148.9083 |
| 1149.4545 | 1151.5865 | 1153.9558 |
| 1154.4729 | 1154.6087 | 1157.6531 |
| 1158.3967 | 1166.8832 | 1172.5445 |
| 1186.5335 | 1195.8443 | 1198.5291 |
| 1201.6273 | 1208.3793 | 1238.6278 |
| 1242.9355 | 1264.4848 | 1265.0149 |
| 1271.6558 | 1272.8471 | 1279.0167 |
| 1283.4966 | 1283.7918 | 1285.9665 |
| 1288.4992 | 1331.0243 | 1342.3350 |
| 1343.2278 | 1349.1233 | 1354.6217 |
| 1359.6740 | 1367.2846 | 1371.2816 |
| 1371.7293 | 1372.2508 | 1394.2102 |
| 1397.6443 | 1408.3161 | 1419.0869 |
| 1420.6333 | 1420.8597 | 1426.4879 |
| 1427.9856 | 1429.5885 | 1432.6596 |
| 1433.8342 | 1449.6474 | 1457.2141 |
| 1470.5662 | 1471.5145 | 1472.8745 |
| 1473.1506 | 1473.7752 | 1474.0268 |
| 1509.8564 | 1561.4873 | 1575.1195 |
| 1577.2713 | 1581.8416 | 1583.8744 |
| 1584.0310 | 1588.2788 | 1589.4991 |
| 1593.0760 | 1593.5044 | 1604.1295 |
| 1606.5360 | 1606.7394 | 1607.5898 |
| 1608.4276 | 1610.9617 | 1611.5032 |
| 1622.4877 | 2876.9613 | 2956.0120 |
| 3030.5230 | 3066.5310 | 3094.5263 |
| 3095.1939 | 3096.6640 | 3097.8269 |
| 3098.7177 | 3099.5052 | 3099.9961 |
| 3101.5619 | 3103.0322 | 3103.2844 |
| 3106.6844 | 3107.2615 | 3107.3176 |
| 3107.9003 | 3108.7434 | 3110.1988 |
| 3111.9280 | 3112.3866 | 3114.3726 |
| 3115.8298 | 3116.9535 | 3118.0473 |
| 3118.2029 | 3120.2319 | 3120.6720 |
| 3121.3534 | 3121.4217 | 3121.6791 |
| 3124.1702 | 3124.5409 | 3125.5116 |
| 3127.2045 | 3128.1964 | 3129.2222 |
| 3130.1987 | 3138.1439 | 3141.3217 |
| 3144.9339 | 3153.5148 | 3160.8284 |

----

Int A iso2 S=1/2

----

|          |          |          |
|----------|----------|----------|
| -7.8332  | 16.3392  | 21.2507  |
| 24.6092  | 26.3437  | 33.8022  |
| 38.3950  | 39.4638  | 40.3572  |
| 43.8287  | 46.0044  | 47.9938  |
| 53.2598  | 55.4792  | 59.0619  |
| 62.9402  | 63.9263  | 65.1430  |
| 73.1531  | 76.5220  | 78.1785  |
| 86.0408  | 87.7600  | 90.4037  |
| 94.0279  | 95.3631  | 103.8589 |
| 108.3079 | 115.2451 | 115.9166 |
| 119.6341 | 124.4020 | 130.8026 |
| 138.7393 | 157.8990 | 164.8898 |
| 172.6234 | 184.9657 | 203.7405 |
| 208.3842 | 212.5857 | 217.9077 |
| 220.8954 | 242.6563 | 243.7539 |
| 252.8901 | 255.3385 | 258.6711 |
| 259.9566 | 267.1785 | 271.2291 |
| 278.3553 | 298.0410 | 300.8811 |
| 309.0434 | 310.5926 | 315.6111 |
| 326.9680 | 333.9420 | 349.7539 |
| 357.9911 | 384.1131 | 394.6869 |
| 396.3678 | 397.1958 | 399.2138 |
| 402.2052 | 404.8282 | 409.4465 |
| 410.7659 | 411.6270 | 414.9297 |
| 428.0740 | 430.3535 | 448.4079 |
| 458.0962 | 462.7449 | 482.1247 |
| 495.8233 | 498.1684 | 504.8625 |
| 507.4909 | 525.7615 | 532.6539 |
| 539.2242 | 551.6885 | 557.2263 |
| 572.0182 | 603.6376 | 611.9246 |
| 612.1473 | 612.7761 | 613.0611 |
| 614.1896 | 625.5819 | 626.2248 |
| 628.1688 | 632.1563 | 634.7183 |
| 637.1031 | 638.1826 | 647.8514 |
| 654.2328 | 663.4012 | 683.8346 |
| 689.0927 | 696.5025 | 699.0203 |
| 706.2091 | 707.8926 | 714.0879 |
| 716.4988 | 720.0426 | 720.9938 |
| 734.0313 | 748.3850 | 749.6473 |
| 751.4755 | 756.7087 | 760.2121 |
| 761.5288 | 765.7830 | 773.9809 |
| 782.1082 | 790.1990 | 794.5582 |
| 802.7923 | 816.6344 | 817.0212 |
| 824.9871 | 826.7354 | 832.2653 |
| 840.6575 | 845.8021 | 849.5461 |
| 866.3397 | 868.3544 | 886.7375 |
| 889.3191 | 890.5676 | 903.4032 |
| 907.0506 | 925.5825 | 928.6271 |
| 928.7479 | 933.2630 | 935.9564 |
| 942.9119 | 947.6925 | 948.2908 |
| 951.5475 | 953.9642 | 955.8841 |
| 956.6288 | 964.2216 | 966.4153 |
| 968.3644 | 971.3225 | 973.4388 |
| 975.8867 | 978.6487 | 979.1612 |

|                  |           |           |          |          |          |
|------------------|-----------|-----------|----------|----------|----------|
| 980.6569         | 983.1450  | 984.8549  | -11.5895 | 12.5873  | 15.1835  |
| 986.0615         | 988.3100  | 989.1755  | 16.6464  | 23.2670  | 29.4052  |
| 989.7489         | 993.7019  | 995.6109  | 32.7013  | 37.0845  | 39.4356  |
| 998.7336         | 1002.3186 | 1009.5719 | 40.6513  | 44.4944  | 50.1329  |
| 1010.8388        | 1015.3010 | 1021.8710 | 50.7866  | 54.3845  | 55.5995  |
| 1024.6869        | 1025.7147 | 1026.5071 | 56.5947  | 62.8665  | 64.4782  |
| 1027.9675        | 1034.0619 | 1046.1597 | 72.9651  | 75.8553  | 79.5215  |
| 1046.7775        | 1055.6019 | 1063.4270 | 80.1047  | 85.7870  | 88.6595  |
| 1065.8807        | 1070.2508 | 1073.5306 | 93.9465  | 100.6820 | 103.8235 |
| 1074.5498        | 1084.4817 | 1092.3461 | 106.7404 | 109.4436 | 115.0534 |
| 1094.6585        | 1097.9223 | 1100.9209 | 118.7304 | 125.7404 | 130.1948 |
| 1105.6674        | 1132.9246 | 1133.3261 | 151.1472 | 165.9707 | 172.1961 |
| 1134.1459        | 1134.2778 | 1135.9739 | 181.9170 | 197.4378 | 200.6797 |
| 1138.5790        | 1141.8986 | 1146.1035 | 207.2111 | 215.6560 | 220.0119 |
| 1147.8529        | 1149.5939 | 1152.8004 | 224.4754 | 240.8399 | 248.7805 |
| 1153.6092        | 1155.6147 | 1159.3537 | 249.2202 | 256.9806 | 260.8747 |
| 1159.4299        | 1161.7505 | 1172.0558 | 261.6024 | 268.3902 | 275.4550 |
| 1180.5061        | 1184.1908 | 1190.4709 | 285.6854 | 288.6432 | 296.0489 |
| 1202.3333        | 1206.9690 | 1240.2012 | 305.8973 | 321.6876 | 328.2253 |
| 1244.7795        | 1257.2746 | 1263.4422 | 338.8809 | 347.1643 | 356.4847 |
| 1272.2401        | 1272.9368 | 1278.6172 | 361.2953 | 372.4296 | 389.7754 |
| 1281.1691        | 1283.1532 | 1287.1948 | 392.5813 | 398.2531 | 401.4498 |
| 1289.2612        | 1324.4746 | 1341.6677 | 402.5897 | 405.3710 | 406.6632 |
| 1345.4530        | 1349.8163 | 1355.5995 | 408.4744 | 410.9460 | 418.4231 |
| 1357.2578        | 1367.3299 | 1368.1780 | 420.3041 | 452.5858 | 464.6389 |
| 1370.9423        | 1372.9195 | 1393.1285 | 476.2569 | 478.2928 | 492.7685 |
| 1404.3483        | 1406.5707 | 1420.8451 | 502.2997 | 508.7419 | 510.6617 |
| 1421.1919        | 1422.1596 | 1427.5350 | 516.6111 | 521.4091 | 525.7904 |
| 1428.3736        | 1428.5818 | 1432.0984 | 541.0749 | 552.8903 | 580.8974 |
| 1433.4735        | 1449.8007 | 1455.8177 | 604.6071 | 611.2184 | 611.6169 |
| 1466.8662        | 1470.0058 | 1471.3704 | 612.3584 | 613.5540 | 616.3268 |
| 1472.3040        | 1472.9655 | 1473.1740 | 624.2400 | 627.7235 | 627.9068 |
| 1500.4672        | 1540.3817 | 1574.8341 | 630.2795 | 633.1860 | 634.5602 |
| 1576.3513        | 1577.2218 | 1581.6889 | 637.0171 | 649.2049 | 661.3066 |
| 1585.1650        | 1587.5643 | 1590.9248 | 666.0749 | 689.8492 | 691.6306 |
| 1592.2208        | 1595.1997 | 1602.3392 | 694.1123 | 697.0056 | 700.8196 |
| 1604.6206        | 1604.9028 | 1605.3384 | 703.9366 | 706.7617 | 720.2577 |
| 1607.0604        | 1609.3936 | 1611.0387 | 723.9940 | 729.7555 | 736.5952 |
| 1612.4989        | 2956.2569 | 3028.7182 | 740.0464 | 742.6870 | 748.0135 |
| 3061.5449        | 3087.8024 | 3094.6401 | 749.2550 | 752.4667 | 755.3393 |
| 3095.7571        | 3096.2704 | 3096.3435 | 761.1277 | 766.4712 | 780.8560 |
| 3097.0411        | 3097.8885 | 3098.3820 | 787.5361 | 794.3026 | 801.9767 |
| 3098.6840        | 3098.7971 | 3105.1699 | 813.4393 | 814.2472 | 818.6693 |
| 3105.4031        | 3105.6270 | 3107.2381 | 821.1079 | 824.9036 | 829.8669 |
| 3107.5992        | 3108.4866 | 3109.1751 | 831.0884 | 836.0020 | 841.0919 |
| 3110.0663        | 3115.2929 | 3115.5907 | 863.5411 | 869.4643 | 880.5589 |
| 3116.0022        | 3116.0649 | 3117.0920 | 890.8703 | 895.7840 | 900.3527 |
| 3118.4502        | 3119.7234 | 3120.4033 | 905.3878 | 920.6713 | 926.1867 |
| 3123.4436        | 3124.3011 | 3124.6503 | 926.4953 | 929.6874 | 930.6477 |
| 3125.2520        | 3127.7381 | 3128.2993 | 942.1160 | 946.9190 | 947.2411 |
| 3131.0078        | 3131.2810 | 3132.8849 | 952.0728 | 957.7853 | 958.2812 |
| 3133.0173        | 3143.1126 | 3149.7738 | 958.7995 | 960.1026 | 963.5039 |
| 3150.1101        | 3151.1543 | 3162.5498 | 964.3224 | 969.4672 | 975.3034 |
| ----             |           |           | 975.5586 | 978.5043 | 978.9637 |
| Int A iso1 S=3/2 |           |           | 979.7466 | 980.2614 | 982.1066 |
| ----             |           |           | 984.6609 | 985.8414 | 986.7783 |

|                  |           |           |          |           |           |
|------------------|-----------|-----------|----------|-----------|-----------|
| 987.4877         | 988.3093  | 989.6512  | 33.6427  | 36.4232   | 40.5190   |
| 989.8798         | 1001.7490 | 1004.2123 | 42.0685  | 47.6142   | 50.5131   |
| 1009.4103        | 1011.6806 | 1014.0327 | 51.4247  | 56.0623   | 57.0797   |
| 1023.4407        | 1024.9671 | 1027.0923 | 58.6250  | 62.9936   | 70.2350   |
| 1027.4288        | 1029.6298 | 1030.4706 | 70.6939  | 74.6160   | 79.4045   |
| 1047.2415        | 1048.6959 | 1051.7469 | 80.9767  | 83.3715   | 86.5129   |
| 1062.1930        | 1074.1479 | 1075.8007 | 91.7643  | 94.9426   | 99.7061   |
| 1076.3652        | 1082.4892 | 1085.2818 | 105.2350 | 110.1525  | 114.0381  |
| 1091.6084        | 1096.2379 | 1096.6311 | 117.2190 | 123.5273  | 127.3264  |
| 1099.5125        | 1133.4105 | 1134.7429 | 138.1857 | 154.1727  | 165.5065  |
| 1135.0404        | 1135.9764 | 1136.9311 | 178.3682 | 184.6299  | 193.0929  |
| 1138.5976        | 1140.5182 | 1148.0300 | 205.9219 | 217.6161  | 220.1769  |
| 1148.3503        | 1152.7659 | 1154.5989 | 222.7685 | 236.8367  | 246.2345  |
| 1155.5393        | 1155.8153 | 1156.0160 | 252.7514 | 260.0942  | 260.8790  |
| 1160.1873        | 1161.3129 | 1170.5624 | 262.5617 | 272.3811  | 278.0523  |
| 1179.2513        | 1189.8429 | 1194.6425 | 282.6556 | 286.4235  | 300.7598  |
| 1207.4335        | 1214.8283 | 1240.8369 | 305.7280 | 313.3226  | 325.4935  |
| 1242.3759        | 1264.7854 | 1266.3164 | 332.4756 | 345.2954  | 352.3430  |
| 1273.8894        | 1273.9316 | 1280.2664 | 360.5616 | 377.5650  | 396.1100  |
| 1283.4601        | 1283.9757 | 1284.7086 | 397.5640 | 398.5404  | 399.9561  |
| 1289.9575        | 1330.3585 | 1342.5809 | 402.1184 | 404.4121  | 407.0965  |
| 1345.1152        | 1347.7439 | 1354.9711 | 408.6461 | 418.1900  | 419.6666  |
| 1357.3669        | 1366.6409 | 1370.5033 | 420.8439 | 442.3613  | 451.0645  |
| 1371.8602        | 1372.4658 | 1394.0685 | 466.4276 | 479.1551  | 490.8652  |
| 1398.6264        | 1407.4969 | 1420.6981 | 492.7878 | 501.2191  | 508.4771  |
| 1421.2986        | 1421.4056 | 1426.9431 | 517.2390 | 520.1735  | 527.8371  |
| 1429.0284        | 1430.0031 | 1433.3439 | 540.9098 | 554.3019  | 579.6610  |
| 1433.7878        | 1449.9692 | 1456.7164 | 598.1955 | 604.3043  | 612.0670  |
| 1469.9301        | 1471.9125 | 1472.4467 | 612.9011 | 613.5419  | 614.1316  |
| 1473.5397        | 1474.9999 | 1475.9438 | 615.6736 | 625.4994  | 628.1799  |
| 1508.9821        | 1559.6527 | 1575.2299 | 631.5036 | 633.2164  | 633.6508  |
| 1577.5381        | 1581.2285 | 1583.2649 | 635.9789 | 649.2387  | 654.6447  |
| 1584.0595        | 1588.8132 | 1591.3719 | 665.1268 | 666.9810  | 686.9721  |
| 1592.7054        | 1593.9812 | 1605.8538 | 689.7543 | 691.9993  | 694.1640  |
| 1606.5489        | 1607.0867 | 1608.0656 | 696.3759 | 703.2396  | 712.3675  |
| 1608.3591        | 1610.6947 | 1611.9856 | 721.5385 | 722.9507  | 734.7589  |
| 1621.1920        | 2957.7217 | 3029.7940 | 737.9492 | 748.3035  | 748.8656  |
| 3063.3160        | 3078.6963 | 3095.7584 | 752.5343 | 755.6917  | 760.3768  |
| 3096.6564        | 3097.0736 | 3098.0019 | 766.1338 | 779.5750  | 779.9988  |
| 3098.1146        | 3099.4789 | 3099.6822 | 791.6485 | 800.5278  | 809.7782  |
| 3100.0341        | 3101.9126 | 3103.7135 | 810.9311 | 814.0282  | 819.7631  |
| 3104.0802        | 3105.2141 | 3107.4324 | 820.7475 | 821.8864  | 828.6713  |
| 3107.9799        | 3108.7568 | 3110.0430 | 832.9362 | 834.4763  | 847.2348  |
| 3112.0882        | 3112.8859 | 3114.6598 | 864.2953 | 869.1934  | 879.2234  |
| 3116.3890        | 3117.7659 | 3118.6010 | 892.0904 | 894.3999  | 897.7636  |
| 3118.7176        | 3119.3397 | 3121.2110 | 910.7033 | 919.8491  | 920.5490  |
| 3121.4139        | 3121.8059 | 3123.6779 | 926.3766 | 930.7153  | 932.6650  |
| 3124.4188        | 3124.6011 | 3127.7898 | 940.9201 | 946.3966  | 946.9951  |
| 3127.9425        | 3128.6815 | 3129.2379 | 955.5925 | 956.4982  | 958.9307  |
| 3132.2485        | 3135.1886 | 3135.3388 | 960.2501 | 960.3848  | 962.7257  |
| 3136.5014        | 3143.7195 | 3144.1589 | 965.3395 | 972.8317  | 974.9433  |
| ----             |           |           | 978.0007 | 978.4743  | 978.5437  |
| Int A iso2 S=3/2 |           |           | 980.1674 | 981.8186  | 984.3510  |
| ----             |           |           | 985.4277 | 986.6833  | 987.9234  |
| -1.3734          | 11.5774   | 14.8249   | 988.8100 | 993.6038  | 994.2554  |
| 20.6795          | 21.7123   | 30.1294   | 998.1019 | 1002.6588 | 1006.5078 |



|                  |           |           |           |           |           |
|------------------|-----------|-----------|-----------|-----------|-----------|
| 1010.3898        | 1014.3212 | 1023.6909 | 49.7549   | 53.9732   | 57.9193   |
| 1026.2778        | 1026.8417 | 1028.5068 | 61.6213   | 62.2032   | 65.6734   |
| 1029.8533        | 1032.8778 | 1047.8827 | 68.9355   | 71.9749   | 74.5181   |
| 1048.6435        | 1049.1906 | 1052.3778 | 80.7932   | 88.5101   | 91.3031   |
| 1062.6641        | 1072.9282 | 1075.7029 | 97.1413   | 99.3250   | 106.2747  |
| 1079.1915        | 1083.0152 | 1090.0232 | 107.7944  | 111.3813  | 114.3217  |
| 1094.6726        | 1095.6596 | 1098.6713 | 121.2651  | 125.4566  | 129.6196  |
| 1101.5520        | 1131.6001 | 1133.4031 | 142.8983  | 165.4208  | 170.8437  |
| 1135.6665        | 1136.3966 | 1137.7565 | 185.3966  | 192.2766  | 198.4455  |
| 1138.6578        | 1138.9751 | 1145.7305 | 206.6718  | 210.6324  | 213.8087  |
| 1147.6545        | 1152.7185 | 1153.1614 | 215.6172  | 236.3442  | 238.9401  |
| 1154.4951        | 1156.0432 | 1159.2185 | 242.5267  | 249.0091  | 253.7284  |
| 1160.9717        | 1164.4425 | 1178.6812 | 259.3425  | 265.5725  | 273.8852  |
| 1179.3834        | 1189.4494 | 1194.2545 | 280.8255  | 285.6825  | 293.6426  |
| 1207.9041        | 1238.4066 | 1242.3006 | 300.9497  | 317.7974  | 330.7571  |
| 1258.5129        | 1264.4224 | 1269.8117 | 336.6177  | 339.6399  | 343.2995  |
| 1272.2370        | 1274.5432 | 1277.2665 | 356.8780  | 358.0058  | 383.9820  |
| 1282.4145        | 1283.5216 | 1284.2640 | 391.2712  | 393.1845  | 398.8465  |
| 1293.6602        | 1330.8769 | 1342.4926 | 402.7406  | 402.8157  | 408.9719  |
| 1343.8571        | 1349.0318 | 1356.0347 | 412.0260  | 414.6486  | 418.5443  |
| 1357.4542        | 1366.0107 | 1370.9784 | 421.8655  | 448.6677  | 462.4862  |
| 1371.5466        | 1371.9357 | 1396.2409 | 472.1121  | 475.9978  | 490.0816  |
| 1397.9491        | 1407.4250 | 1420.6141 | 499.7279  | 502.5552  | 506.5177  |
| 1420.7858        | 1421.2693 | 1426.1685 | 508.8972  | 518.6623  | 526.7681  |
| 1426.5982        | 1429.0104 | 1433.1109 | 541.0974  | 552.5292  | 574.4387  |
| 1435.0029        | 1450.6068 | 1456.9816 | 577.8555  | 601.0727  | 610.6611  |
| 1470.7076        | 1471.0480 | 1471.8297 | 611.3924  | 612.0220  | 612.8478  |
| 1472.7816        | 1474.4800 | 1474.7489 | 614.2008  | 624.8463  | 625.6258  |
| 1508.7883        | 1559.8811 | 1574.9416 | 629.3247  | 630.7089  | 631.6537  |
| 1576.1948        | 1577.5694 | 1581.4562 | 633.2058  | 639.0833  | 646.1053  |
| 1584.8397        | 1586.8954 | 1591.3690 | 655.0554  | 663.1917  | 681.0281  |
| 1593.7337        | 1594.4910 | 1604.5285 | 694.1091  | 694.1633  | 700.0602  |
| 1605.5377        | 1606.0382 | 1608.3073 | 701.6353  | 701.7531  | 709.6318  |
| 1608.3310        | 1610.6996 | 1612.8274 | 717.9754  | 722.5740  | 729.4997  |
| 1621.5934        | 2958.2672 | 3029.8571 | 732.5247  | 743.7960  | 745.9568  |
| 3066.0468        | 3068.5259 | 3086.2015 | 750.9835  | 752.7354  | 757.7708  |
| 3095.4895        | 3096.0459 | 3096.0526 | 763.0338  | 766.7954  | 777.2106  |
| 3096.4167        | 3097.6010 | 3099.6510 | 778.8922  | 786.6503  | 795.4113  |
| 3099.7321        | 3100.6851 | 3105.0809 | 804.0883  | 814.9382  | 819.2210  |
| 3105.6499        | 3106.1835 | 3106.5892 | 824.1777  | 828.5800  | 831.1630  |
| 3106.9115        | 3108.3986 | 3108.5074 | 833.0122  | 838.9239  | 840.0845  |
| 3110.7075        | 3112.1138 | 3113.5399 | 859.9791  | 867.3876  | 882.1443  |
| 3114.0376        | 3114.5574 | 3117.6270 | 889.5200  | 894.5614  | 898.9937  |
| 3118.0033        | 3120.5490 | 3120.7748 | 902.4732  | 920.4974  | 924.0721  |
| 3123.3924        | 3124.4410 | 3125.0423 | 926.4345  | 929.3225  | 930.8600  |
| 3126.5526        | 3126.9725 | 3127.8509 | 942.0978  | 943.1811  | 944.4665  |
| 3130.1655        | 3131.2684 | 3133.8141 | 952.3644  | 954.0325  | 955.5995  |
| 3135.1582        | 3137.3718 | 3137.8471 | 958.1379  | 959.5952  | 962.7326  |
| 3139.5424        | 3141.2562 | 3186.9064 | 965.6720  | 967.2578  | 968.5055  |
| ----             |           |           | 972.3765  | 976.0729  | 977.5661  |
| Int A iso1 S=5/2 |           |           | 977.6433  | 978.6711  | 982.2268  |
| ----             |           |           | 984.6402  | 985.1048  | 987.0239  |
| -8.7406          | 9.6069    | 14.4370   | 988.0062  | 988.7759  | 990.2643  |
| 20.2149          | 23.9539   | 30.1688   | 990.9302  | 1000.5103 | 1000.9412 |
| 32.6155          | 38.9219   | 40.4722   | 1009.4475 | 1012.0835 | 1020.4118 |
| 43.6067          | 44.0422   | 46.5910   | 1025.0913 | 1025.9869 | 1026.4218 |

|           |           |           |
|-----------|-----------|-----------|
| 1027.2850 | 1040.9793 | 1044.8951 |
| 1046.8397 | 1058.1585 | 1063.1500 |
| 1068.6333 | 1073.2769 | 1073.6545 |
| 1082.7184 | 1087.2540 | 1090.6190 |
| 1093.9144 | 1094.8656 | 1096.0903 |
| 1107.5091 | 1133.7800 | 1133.9560 |
| 1134.6347 | 1135.0985 | 1136.0571 |
| 1138.7856 | 1139.0510 | 1147.1254 |
| 1149.6283 | 1151.1751 | 1153.1733 |
| 1154.0866 | 1154.3844 | 1155.3077 |
| 1159.2529 | 1159.7138 | 1168.5362 |
| 1175.3428 | 1178.7756 | 1183.2319 |
| 1196.3592 | 1207.0773 | 1239.2453 |
| 1243.1289 | 1261.9654 | 1264.3139 |
| 1268.5865 | 1273.7629 | 1275.9847 |
| 1281.3646 | 1283.0662 | 1283.5010 |
| 1290.9124 | 1321.8593 | 1342.3022 |
| 1345.0153 | 1346.2882 | 1356.8566 |
| 1358.2633 | 1367.1010 | 1368.7974 |
| 1370.7924 | 1372.5945 | 1393.4980 |
| 1398.7231 | 1407.4863 | 1419.1868 |
| 1421.0537 | 1422.4160 | 1425.5665 |
| 1426.4315 | 1429.2660 | 1430.6433 |
| 1433.5210 | 1446.1224 | 1455.1840 |
| 1467.9430 | 1469.8970 | 1472.6198 |
| 1473.0427 | 1474.2791 | 1475.6073 |
| 1500.1494 | 1544.0818 | 1574.7057 |
| 1574.9263 | 1575.1252 | 1579.0566 |
| 1582.2480 | 1586.4550 | 1588.3237 |
| 1588.8034 | 1594.1084 | 1600.9837 |
| 1603.9185 | 1605.3705 | 1606.9567 |
| 1608.2324 | 1608.5679 | 1609.3420 |
| 1611.3235 | 2955.3646 | 3027.7393 |
| 3062.7966 | 3070.0791 | 3093.0675 |
| 3093.4863 | 3096.2224 | 3096.6490 |
| 3096.8842 | 3097.5667 | 3097.6681 |
| 3098.8437 | 3099.0062 | 3102.4694 |
| 3103.9498 | 3105.8728 | 3105.9062 |
| 3106.8363 | 3107.0137 | 3108.6320 |
| 3109.6881 | 3110.4712 | 3111.4216 |
| 3111.7715 | 3113.3763 | 3116.2680 |
| 3117.0759 | 3117.1654 | 3118.3698 |
| 3118.5744 | 3119.4847 | 3122.5188 |
| 3123.0488 | 3123.6038 | 3124.1689 |
| 3124.5031 | 3124.7622 | 3125.3089 |
| 3126.9785 | 3135.8133 | 3139.0836 |
| 3139.5980 | 3143.8465 | 3144.1232 |

----

Int A iso2 S=5/2

----

|         |         |         |
|---------|---------|---------|
| -7.0820 | 15.7338 | 20.6383 |
| 24.1398 | 28.1098 | 32.8468 |
| 40.6068 | 41.6734 | 42.7760 |
| 44.1132 | 48.6301 | 51.3185 |
| 56.5267 | 60.5192 | 60.8889 |
| 66.8174 | 68.8311 | 69.8735 |

|           |           |           |
|-----------|-----------|-----------|
| 73.7220   | 77.5345   | 79.3564   |
| 85.7688   | 87.3145   | 91.5958   |
| 97.3865   | 100.2603  | 100.8994  |
| 106.3603  | 110.8636  | 114.6383  |
| 121.3341  | 133.6292  | 137.0660  |
| 152.6644  | 162.2398  | 181.7647  |
| 184.0252  | 192.5395  | 202.6258  |
| 210.4693  | 211.4906  | 221.0074  |
| 224.5733  | 234.1204  | 239.7556  |
| 248.8159  | 258.9147  | 261.1803  |
| 267.1744  | 274.2437  | 277.2516  |
| 281.6529  | 284.6885  | 297.2275  |
| 307.7485  | 320.2786  | 323.4346  |
| 331.8082  | 341.4250  | 346.3716  |
| 351.7045  | 357.8294  | 375.0009  |
| 381.1697  | 394.5739  | 395.2710  |
| 397.3877  | 403.4640  | 405.0052  |
| 409.2502  | 413.4383  | 417.7684  |
| 418.0651  | 421.8051  | 447.3401  |
| 466.4436  | 475.5474  | 488.7892  |
| 500.5548  | 503.4609  | 508.0413  |
| 511.4813  | 515.7912  | 526.6861  |
| 540.8725  | 555.2866  | 573.6746  |
| 582.8007  | 602.8292  | 611.3816  |
| 612.7192  | 613.3051  | 614.3179  |
| 616.3488  | 625.6258  | 627.7696  |
| 630.3119  | 632.0712  | 633.5247  |
| 634.5302  | 641.2850  | 647.2849  |
| 662.6286  | 667.0614  | 683.0290  |
| 694.0547  | 695.3274  | 702.2744  |
| 703.4316  | 707.1784  | 710.3334  |
| 721.3413  | 727.0262  | 733.8011  |
| 738.7445  | 747.4701  | 749.1077  |
| 752.5881  | 756.4232  | 760.4604  |
| 766.9243  | 779.4223  | 789.7859  |
| 798.6245  | 802.7014  | 814.0376  |
| 820.3568  | 822.8337  | 828.9058  |
| 831.5161  | 832.7661  | 837.2230  |
| 840.6740  | 844.2448  | 855.1686  |
| 862.6404  | 869.1842  | 883.9470  |
| 889.0074  | 896.9753  | 900.3362  |
| 909.7383  | 922.1222  | 924.4623  |
| 929.4477  | 931.0846  | 932.3780  |
| 943.4085  | 945.0583  | 946.4650  |
| 952.2451  | 956.1605  | 960.6061  |
| 961.2219  | 965.5912  | 965.8806  |
| 968.2476  | 970.8986  | 972.2948  |
| 976.3624  | 977.2279  | 979.3501  |
| 981.0526  | 984.8498  | 985.5329  |
| 987.0776  | 988.3311  | 990.4324  |
| 990.6649  | 992.3277  | 994.5009  |
| 998.8567  | 1003.5616 | 1010.0620 |
| 1015.2927 | 1015.4791 | 1025.7987 |
| 1026.4056 | 1027.3273 | 1028.0735 |
| 1029.0375 | 1042.5281 | 1045.5406 |
| 1047.0686 | 1049.7281 | 1059.1581 |

|           |           |           |
|-----------|-----------|-----------|
| 1066.0953 | 1074.1551 | 1075.7084 |
| 1079.5256 | 1085.8450 | 1087.4488 |
| 1089.8804 | 1093.6268 | 1095.4353 |
| 1098.7140 | 1134.1784 | 1135.2476 |
| 1135.9758 | 1136.0692 | 1137.2941 |
| 1137.6179 | 1139.2060 | 1146.2056 |
| 1147.7737 | 1151.6962 | 1154.4652 |
| 1156.7444 | 1157.9528 | 1160.1883 |
| 1161.6670 | 1164.7092 | 1176.7848 |
| 1183.6486 | 1187.1710 | 1197.7783 |
| 1207.5557 | 1236.4956 | 1238.9934 |
| 1240.8582 | 1262.0051 | 1267.6672 |
| 1270.7773 | 1274.6032 | 1276.1386 |
| 1282.1533 | 1286.3615 | 1287.6099 |
| 1293.6876 | 1330.2948 | 1341.3521 |
| 1342.7414 | 1347.0334 | 1356.7062 |
| 1359.2252 | 1367.3507 | 1369.7976 |
| 1370.6536 | 1372.1732 | 1392.1057 |
| 1393.3187 | 1404.2573 | 1419.5861 |
| 1421.2797 | 1422.1439 | 1427.0444 |
| 1427.5308 | 1430.1703 | 1433.2884 |
| 1434.2196 | 1450.5084 | 1455.9050 |
| 1469.6502 | 1472.9395 | 1473.5016 |
| 1474.3927 | 1474.6639 | 1476.1653 |
| 1504.6747 | 1556.0867 | 1573.4925 |
| 1576.3399 | 1580.9989 | 1581.3101 |
| 1588.3782 | 1588.3885 | 1592.1601 |
| 1593.2334 | 1593.6935 | 1605.3093 |
| 1605.9638 | 1606.8599 | 1607.9202 |
| 1608.6339 | 1610.5002 | 1612.7339 |
| 1613.6486 | 2960.8179 | 3032.9172 |
| 3074.1716 | 3096.2749 | 3097.2254 |
| 3097.3250 | 3097.5161 | 3097.7148 |
| 3097.9690 | 3100.2491 | 3100.5499 |
| 3104.5219 | 3104.9503 | 3105.7347 |
| 3105.9694 | 3108.9760 | 3109.4266 |
| 3109.5312 | 3111.1279 | 3111.3758 |
| 3112.8472 | 3112.8937 | 3113.3265 |
| 3115.6848 | 3118.4160 | 3120.2475 |
| 3120.7212 | 3120.9163 | 3121.1822 |
| 3122.7897 | 3123.1002 | 3125.2032 |
| 3126.6778 | 3128.2009 | 3128.4680 |
| 3129.8832 | 3129.9162 | 3130.8940 |
| 3130.9421 | 3139.2065 | 3143.4978 |
| 3148.2408 | 3151.7855 | 3162.5781 |

----

Int B isol S=1/2

----

|         |          |          |
|---------|----------|----------|
| -9.9971 | 18.7044  | 23.3863  |
| 28.5431 | 31.2369  | 33.8160  |
| 37.9830 | 42.3557  | 46.0423  |
| 48.2099 | 51.0141  | 52.3027  |
| 61.5980 | 65.0275  | 68.7748  |
| 73.4037 | 75.5913  | 79.8688  |
| 82.7571 | 87.2911  | 87.9687  |
| 93.1518 | 103.9685 | 107.2011 |

|           |           |           |
|-----------|-----------|-----------|
| 113.9570  | 122.4352  | 126.6204  |
| 160.0214  | 169.0018  | 173.8475  |
| 192.0144  | 205.0998  | 208.5479  |
| 217.0923  | 226.2935  | 239.6406  |
| 244.0930  | 252.1150  | 256.2525  |
| 269.6944  | 273.6645  | 283.2636  |
| 289.0784  | 297.2603  | 301.5999  |
| 309.5782  | 317.1887  | 324.7392  |
| 335.1587  | 342.6591  | 344.9526  |
| 358.8434  | 363.4337  | 382.9573  |
| 396.8171  | 400.8888  | 401.4216  |
| 404.3864  | 405.9746  | 409.8297  |
| 414.6787  | 422.6455  | 424.7429  |
| 449.5461  | 465.5630  | 476.3988  |
| 487.7554  | 498.2378  | 504.1863  |
| 507.2648  | 511.8037  | 521.7903  |
| 527.5756  | 540.3148  | 552.7706  |
| 559.1444  | 579.5143  | 611.7264  |
| 611.9195  | 613.4690  | 614.1572  |
| 616.6405  | 624.4673  | 628.6434  |
| 629.7826  | 632.0806  | 633.6492  |
| 636.4814  | 637.9488  | 666.6396  |
| 670.0207  | 693.4017  | 694.6756  |
| 698.1403  | 701.4701  | 703.2499  |
| 704.9814  | 728.6379  | 736.1260  |
| 740.2108  | 747.6281  | 749.1933  |
| 752.1879  | 755.1840  | 760.3334  |
| 767.2321  | 780.9264  | 790.3266  |
| 799.2884  | 800.9873  | 819.6193  |
| 820.0830  | 824.4946  | 825.3535  |
| 827.7789  | 828.5208  | 834.4689  |
| 836.7518  | 863.8089  | 868.1202  |
| 889.2860  | 893.9297  | 900.4113  |
| 905.0961  | 922.3702  | 923.7857  |
| 930.0299  | 930.8313  | 937.4811  |
| 940.3006  | 946.6591  | 947.1980  |
| 955.5893  | 955.9997  | 957.3455  |
| 957.8568  | 963.1636  | 963.3310  |
| 966.0825  | 967.5589  | 977.4026  |
| 978.5266  | 978.6499  | 980.1844  |
| 981.7434  | 983.1231  | 984.2170  |
| 987.6651  | 988.1333  | 989.5792  |
| 991.0298  | 992.4200  | 997.6726  |
| 1004.7169 | 1008.9262 | 1022.0873 |
| 1024.9905 | 1026.7347 | 1028.0123 |
| 1028.6879 | 1030.1154 | 1047.3234 |
| 1052.6018 | 1053.6652 | 1072.1745 |
| 1074.9440 | 1075.1565 | 1079.4541 |
| 1090.8004 | 1093.4142 | 1097.5793 |
| 1099.7765 | 1104.6704 | 1134.5081 |
| 1134.5513 | 1135.6364 | 1137.0590 |
| 1138.5386 | 1141.0184 | 1147.6393 |
| 1148.2389 | 1153.4235 | 1153.8368 |
| 1157.2347 | 1157.9168 | 1159.3055 |
| 1161.6381 | 1174.0652 | 1185.1985 |
| 1191.0120 | 1192.3278 | 1207.6894 |

|           |           |           |
|-----------|-----------|-----------|
| 1241.4801 | 1243.8819 | 1259.9310 |
| 1263.5989 | 1274.5787 | 1275.2126 |
| 1281.9374 | 1282.5632 | 1285.1957 |
| 1287.7192 | 1288.9573 | 1329.5088 |
| 1342.5276 | 1343.8816 | 1346.1720 |
| 1357.9608 | 1367.4092 | 1368.7651 |
| 1372.7677 | 1373.0631 | 1394.1292 |
| 1399.1100 | 1411.7514 | 1418.3526 |
| 1421.9648 | 1427.6142 | 1429.7036 |
| 1431.9609 | 1433.1814 | 1434.0229 |
| 1457.3276 | 1468.9510 | 1472.6709 |
| 1472.8735 | 1473.5751 | 1474.3246 |
| 1475.1696 | 1508.5443 | 1559.6155 |
| 1575.3706 | 1576.8077 | 1583.8210 |
| 1590.4960 | 1591.6660 | 1594.0098 |
| 1595.9369 | 1605.7975 | 1607.0166 |
| 1607.2525 | 1607.8865 | 1609.4483 |
| 1611.2726 | 1612.9639 | 1621.4943 |
| 2955.8449 | 3032.8215 | 3066.4623 |
| 3093.8516 | 3096.7176 | 3097.4369 |
| 3097.4721 | 3098.2069 | 3098.3715 |
| 3099.4162 | 3099.6296 | 3104.4418 |
| 3105.4579 | 3107.1813 | 3108.2216 |
| 3111.9556 | 3112.4057 | 3112.7591 |
| 3113.5675 | 3113.7973 | 3118.0065 |
| 3119.0298 | 3120.2224 | 3120.3862 |
| 3120.8422 | 3121.0593 | 3124.7770 |
| 3126.1337 | 3126.7141 | 3126.7939 |
| 3127.4557 | 3130.5630 | 3132.5387 |
| 3133.0227 | 3133.3305 | 3134.9570 |
| 3137.5789 | 3137.9249 | 3139.8358 |

----

Int B iso2 S=1/2

----

|          |          |          |
|----------|----------|----------|
| -11.4471 | -5.7145  | 14.3193  |
| 20.0089  | 21.5970  | 26.7357  |
| 32.0267  | 34.5811  | 38.0766  |
| 42.0716  | 47.4909  | 53.4131  |
| 55.2397  | 59.0148  | 61.9068  |
| 67.1487  | 72.5375  | 77.2970  |
| 82.3575  | 85.8030  | 90.1640  |
| 93.7933  | 99.0992  | 107.5916 |
| 114.9407 | 121.8735 | 138.1820 |
| 149.1613 | 168.2223 | 178.2720 |
| 188.6896 | 197.0363 | 201.4015 |
| 212.2822 | 226.1820 | 232.0343 |
| 242.0859 | 250.2943 | 253.5273 |
| 259.6409 | 272.1433 | 280.6505 |
| 288.7294 | 293.5168 | 301.6624 |
| 304.6321 | 319.3166 | 326.1777 |
| 336.4420 | 342.5861 | 350.2541 |
| 358.8057 | 376.5335 | 382.7986 |
| 394.9239 | 397.7035 | 400.7087 |
| 401.7542 | 403.6601 | 407.0862 |
| 413.4562 | 421.4500 | 425.6433 |
| 440.6239 | 465.7274 | 480.0937 |

|           |           |           |
|-----------|-----------|-----------|
| 496.4203  | 502.1373  | 507.5961  |
| 508.8277  | 512.7988  | 518.8295  |
| 530.0397  | 539.8237  | 552.1593  |
| 575.9757  | 600.3124  | 611.3418  |
| 611.9135  | 612.6681  | 612.8069  |
| 616.3110  | 623.8812  | 628.3184  |
| 630.4481  | 632.0735  | 635.9745  |
| 636.3618  | 648.4018  | 665.9366  |
| 669.1064  | 696.3391  | 697.3180  |
| 699.2781  | 700.6021  | 704.7565  |
| 710.0728  | 727.6586  | 735.3591  |
| 740.1712  | 748.3143  | 749.9420  |
| 752.0931  | 756.3688  | 758.7423  |
| 767.0984  | 780.0219  | 795.3550  |
| 799.8528  | 803.6340  | 818.5430  |
| 820.9420  | 823.4218  | 827.3311  |
| 830.2953  | 834.7630  | 838.3411  |
| 844.5295  | 864.9707  | 866.2469  |
| 881.9709  | 892.2389  | 894.2709  |
| 906.7306  | 907.4621  | 921.8207  |
| 925.9163  | 929.2872  | 931.1964  |
| 938.3472  | 938.6681  | 947.1336  |
| 947.4593  | 952.9755  | 954.2919  |
| 957.0816  | 959.0167  | 962.6870  |
| 967.1992  | 969.7569  | 977.2649  |
| 978.3374  | 978.8434  | 980.1694  |
| 980.9696  | 983.7232  | 985.8981  |
| 987.9036  | 989.3183  | 992.8875  |
| 996.7961  | 997.1857  | 999.0679  |
| 1003.9694 | 1010.8359 | 1013.7562 |
| 1023.5687 | 1024.8061 | 1026.4276 |
| 1027.0654 | 1029.9227 | 1047.1764 |
| 1049.4042 | 1050.5753 | 1073.0922 |
| 1075.1391 | 1076.7430 | 1081.1021 |
| 1090.8519 | 1093.3202 | 1097.3314 |
| 1098.8278 | 1099.6429 | 1134.1662 |
| 1135.5073 | 1136.0673 | 1137.0772 |
| 1139.7145 | 1140.0806 | 1147.8955 |
| 1148.8634 | 1153.4099 | 1154.6112 |
| 1156.9473 | 1158.3348 | 1160.3535 |
| 1166.8012 | 1179.3775 | 1187.6663 |
| 1194.6639 | 1199.8172 | 1205.8500 |
| 1222.3422 | 1240.2149 | 1243.4338 |
| 1263.7367 | 1264.6269 | 1274.9333 |
| 1282.7075 | 1283.2771 | 1286.1300 |
| 1288.4632 | 1296.4906 | 1328.1361 |
| 1343.2153 | 1343.4790 | 1348.4101 |
| 1359.3818 | 1369.0392 | 1369.2516 |
| 1372.4616 | 1374.6986 | 1393.1290 |
| 1399.7421 | 1407.8473 | 1421.8068 |
| 1422.4637 | 1425.6364 | 1430.3740 |
| 1431.0147 | 1434.4974 | 1435.1506 |
| 1458.4903 | 1470.4339 | 1473.2938 |
| 1474.8396 | 1475.1113 | 1476.0385 |
| 1476.9784 | 1508.4110 | 1556.8924 |
| 1575.3129 | 1576.8947 | 1584.6138 |

|           |           |           |
|-----------|-----------|-----------|
| 1591.1888 | 1591.5270 | 1595.2066 |
| 1596.5896 | 1606.5922 | 1607.4303 |
| 1608.2219 | 1608.8369 | 1608.8882 |
| 1611.5189 | 1613.3706 | 1619.1118 |
| 2957.6125 | 3029.8517 | 3063.2699 |
| 3096.1380 | 3096.1681 | 3096.1908 |
| 3096.6540 | 3097.3514 | 3097.3665 |
| 3098.1499 | 3099.1301 | 3100.4820 |
| 3105.0233 | 3107.5775 | 3107.7560 |
| 3108.6320 | 3109.9134 | 3111.3371 |
| 3113.8510 | 3114.3932 | 3114.8423 |
| 3117.1144 | 3117.6855 | 3119.0744 |
| 3119.0932 | 3119.3660 | 3122.2479 |
| 3123.8376 | 3125.3803 | 3126.5124 |
| 3127.6472 | 3128.7314 | 3129.4809 |
| 3129.5684 | 3130.0416 | 3131.3613 |
| 3133.6412 | 3134.9796 | 3137.3017 |

----

Int B iso1 S=3/2

----

|          |          |          |
|----------|----------|----------|
| -12.5717 | 6.4085   | 15.9765  |
| 20.5450  | 23.1910  | 30.7842  |
| 36.1940  | 41.3006  | 44.2730  |
| 46.9064  | 49.6945  | 56.2139  |
| 57.7100  | 65.2262  | 66.7581  |
| 74.1406  | 81.4172  | 84.4533  |
| 88.4618  | 93.5965  | 97.4730  |
| 101.5431 | 109.4503 | 112.7064 |
| 114.3767 | 123.2446 | 132.9723 |
| 135.8396 | 168.6622 | 174.6693 |
| 182.1093 | 201.1624 | 203.9450 |
| 211.6786 | 226.8786 | 234.9778 |
| 244.0094 | 251.0427 | 259.9548 |
| 265.5425 | 271.5578 | 276.3759 |
| 282.9497 | 287.4917 | 304.2052 |
| 307.5614 | 318.1614 | 320.3522 |
| 327.8727 | 341.9853 | 348.4756 |
| 358.7457 | 362.6258 | 384.6976 |
| 395.2209 | 399.5296 | 401.5620 |
| 402.4147 | 404.4961 | 413.7276 |
| 414.6431 | 424.5102 | 426.3166 |
| 446.5341 | 467.9943 | 481.8691 |
| 491.1419 | 500.6171 | 504.4362 |
| 510.6363 | 522.3028 | 527.8649 |
| 536.1171 | 545.9469 | 552.0108 |
| 578.6879 | 611.3043 | 611.4355 |
| 612.8367 | 613.8120 | 616.3894 |
| 623.0725 | 624.2141 | 628.2738 |
| 630.3332 | 632.4058 | 634.3461 |
| 636.4909 | 662.2540 | 667.4481 |
| 689.9212 | 691.4768 | 694.5575 |
| 699.7343 | 700.3508 | 701.1928 |
| 706.2151 | 720.3114 | 733.2093 |
| 737.7733 | 745.0204 | 747.9603 |
| 750.6553 | 753.6564 | 754.1229 |
| 762.2197 | 766.1864 | 781.7074 |

|           |           |           |
|-----------|-----------|-----------|
| 787.9091  | 796.1545  | 801.0275  |
| 808.1460  | 820.2733  | 821.1685  |
| 821.7565  | 825.4725  | 827.5804  |
| 836.8268  | 840.1881  | 857.9765  |
| 866.8107  | 885.4484  | 891.8416  |
| 900.7888  | 907.9558  | 919.9656  |
| 922.7549  | 925.8560  | 928.7436  |
| 937.0699  | 939.8415  | 944.3620  |
| 945.0823  | 953.6399  | 956.3750  |
| 956.7180  | 957.1642  | 962.7480  |
| 964.4320  | 967.3536  | 976.4301  |
| 977.3621  | 979.0504  | 980.3015  |
| 981.6918  | 984.2397  | 985.0198  |
| 986.7517  | 988.0351  | 988.6217  |
| 989.8570  | 990.3293  | 998.6789  |
| 1004.3880 | 1007.2089 | 1010.1462 |
| 1015.8857 | 1023.7060 | 1024.7561 |
| 1026.1975 | 1027.1338 | 1029.5782 |
| 1044.8690 | 1054.1887 | 1070.4216 |
| 1074.6661 | 1075.6862 | 1083.4045 |
| 1087.3274 | 1091.1547 | 1091.3189 |
| 1096.4404 | 1100.2718 | 1133.6371 |
| 1133.9541 | 1135.7686 | 1136.7178 |
| 1137.8676 | 1141.9927 | 1147.3891 |
| 1148.2722 | 1152.0011 | 1152.5437 |
| 1154.7057 | 1157.4223 | 1157.5330 |
| 1163.9409 | 1164.4905 | 1180.8999 |
| 1196.8759 | 1203.6238 | 1207.2694 |
| 1233.8198 | 1239.2471 | 1241.3974 |
| 1263.8956 | 1265.3310 | 1271.3244 |
| 1280.3657 | 1284.9442 | 1287.6219 |
| 1288.3063 | 1288.9582 | 1330.6012 |
| 1340.3231 | 1346.4772 | 1351.5793 |
| 1360.3059 | 1365.5742 | 1366.9236 |
| 1371.3701 | 1374.2966 | 1395.0899 |
| 1401.3344 | 1405.0696 | 1417.8756 |
| 1421.6032 | 1426.8138 | 1428.3092 |
| 1429.8295 | 1434.5651 | 1434.7224 |
| 1458.2775 | 1471.0782 | 1472.4454 |
| 1473.1081 | 1473.3724 | 1474.1382 |
| 1474.7953 | 1510.2703 | 1559.7135 |
| 1576.1527 | 1579.4048 | 1582.8243 |
| 1587.6952 | 1590.6539 | 1592.5920 |
| 1594.7327 | 1605.3945 | 1606.4708 |
| 1606.8453 | 1608.3251 | 1609.2598 |
| 1611.5008 | 1612.0597 | 1622.3274 |
| 2959.2986 | 3032.5101 | 3065.3398 |
| 3094.1190 | 3096.9531 | 3097.1676 |
| 3097.2652 | 3098.0351 | 3098.3663 |
| 3100.5323 | 3101.8854 | 3101.9927 |
| 3103.9331 | 3106.9669 | 3107.1982 |
| 3108.0338 | 3108.9068 | 3109.2750 |
| 3112.4225 | 3114.4131 | 3117.6551 |
| 3118.4665 | 3119.2543 | 3119.7563 |
| 3120.4118 | 3120.5546 | 3124.8522 |
| 3125.8672 | 3126.0171 | 3126.2520 |

|           |           |           |
|-----------|-----------|-----------|
| 3128.6655 | 3129.8071 | 3129.9259 |
| 3130.2139 | 3131.2406 | 3133.7394 |
| 3135.3569 | 3142.3946 | 3145.4371 |

----

Int B iso2 S=3/2

----

|          |          |          |
|----------|----------|----------|
| -12.5779 | 6.4155   | 16.0207  |
| 20.5813  | 23.2162  | 30.7740  |
| 36.1936  | 41.3071  | 44.2707  |
| 46.9018  | 49.6903  | 56.2131  |
| 57.7080  | 65.2177  | 66.7494  |
| 74.1268  | 81.3862  | 84.4459  |
| 88.4549  | 93.5740  | 97.4608  |
| 101.5358 | 109.4410 | 112.7041 |
| 114.3598 | 123.2361 | 132.9662 |
| 135.8094 | 168.6548 | 174.6580 |
| 182.1099 | 201.1593 | 203.9480 |
| 211.6730 | 226.8795 | 234.9744 |
| 244.0108 | 251.0397 | 259.9574 |
| 265.5443 | 271.5524 | 276.3774 |
| 282.9503 | 287.4924 | 304.2059 |
| 307.5626 | 318.1624 | 320.3550 |
| 327.8681 | 341.9817 | 348.4746 |
| 358.7416 | 362.6238 | 384.6981 |
| 395.2240 | 399.5342 | 401.5553 |
| 402.4111 | 404.4900 | 413.7186 |
| 414.6379 | 424.5066 | 426.3143 |
| 446.5344 | 467.9922 | 481.8688 |
| 491.1437 | 500.6175 | 504.4348 |
| 510.6341 | 522.3047 | 527.8671 |
| 536.1152 | 545.9414 | 552.0114 |
| 578.6842 | 611.3057 | 611.4354 |
| 612.8363 | 613.8105 | 616.3896 |
| 623.0722 | 624.2144 | 628.2755 |
| 630.3333 | 632.4063 | 634.3461 |
| 636.4905 | 662.2503 | 667.4472 |
| 689.9231 | 691.4944 | 694.5545 |
| 699.7325 | 700.3523 | 701.1892 |
| 706.2125 | 720.3082 | 733.2082 |
| 737.7722 | 745.0202 | 747.9616 |
| 750.6550 | 753.6543 | 754.1232 |
| 762.2189 | 766.1869 | 781.7075 |
| 787.9061 | 796.1475 | 801.0272 |
| 808.1450 | 820.2748 | 821.1860 |
| 821.7445 | 825.4770 | 827.5741 |
| 836.8240 | 840.1842 | 857.9743 |
| 866.8133 | 885.4611 | 891.8395 |
| 900.7979 | 907.9552 | 919.9672 |
| 922.7568 | 925.8616 | 928.7418 |
| 937.0642 | 939.8397 | 944.3602 |
| 945.0851 | 953.6372 | 956.3802 |
| 956.7102 | 957.1698 | 962.7465 |
| 964.4301 | 967.3525 | 976.4298 |
| 977.3619 | 979.0497 | 980.3007 |
| 981.6900 | 984.2386 | 985.0174 |
| 986.7527 | 988.0358 | 988.6239 |

|           |           |           |
|-----------|-----------|-----------|
| 989.8595  | 990.3288  | 998.6660  |
| 1004.3862 | 1007.2103 | 1010.1442 |
| 1015.8751 | 1023.7056 | 1024.7550 |
| 1026.1996 | 1027.1358 | 1029.5783 |
| 1044.8723 | 1054.1886 | 1070.4204 |
| 1074.6685 | 1075.6900 | 1083.4055 |
| 1087.3303 | 1091.1548 | 1091.3163 |
| 1096.4434 | 1100.2706 | 1133.6358 |
| 1133.9553 | 1135.7696 | 1136.7179 |
| 1137.8696 | 1141.9918 | 1147.3925 |
| 1148.2710 | 1152.0009 | 1152.5399 |
| 1154.7063 | 1157.4254 | 1157.5361 |
| 1163.9426 | 1164.4935 | 1180.9002 |
| 1196.8798 | 1203.6219 | 1207.2657 |
| 1233.8237 | 1239.2514 | 1241.3955 |
| 1263.8925 | 1265.3308 | 1271.3264 |
| 1280.3658 | 1284.9506 | 1287.6253 |
| 1288.3122 | 1288.9607 | 1330.6031 |
| 1340.3212 | 1346.4756 | 1351.5811 |
| 1360.3066 | 1365.5757 | 1366.9279 |
| 1371.3717 | 1374.2987 | 1395.0896 |
| 1401.3359 | 1405.0673 | 1417.8744 |
| 1421.6034 | 1426.8137 | 1428.3088 |
| 1429.8311 | 1434.5668 | 1434.7225 |
| 1458.2793 | 1471.0772 | 1472.4464 |
| 1473.1088 | 1473.3733 | 1474.1417 |
| 1474.8006 | 1510.2725 | 1559.7168 |
| 1576.1529 | 1579.4070 | 1582.8257 |
| 1587.6963 | 1590.6567 | 1592.5928 |
| 1594.7361 | 1605.3944 | 1606.4694 |
| 1606.8495 | 1608.3242 | 1609.2627 |
| 1611.5015 | 1612.0616 | 1622.3296 |
| 2959.2961 | 3032.5042 | 3065.3418 |
| 3094.1184 | 3096.9523 | 3097.1682 |
| 3097.2658 | 3098.0343 | 3098.3657 |
| 3100.5323 | 3101.8856 | 3102.0012 |
| 3103.9329 | 3106.9663 | 3107.2032 |
| 3108.0342 | 3108.9074 | 3109.2766 |
| 3112.4222 | 3114.4134 | 3117.6548 |
| 3118.4663 | 3119.2545 | 3119.7567 |
| 3120.4114 | 3120.5553 | 3124.8522 |
| 3125.8672 | 3126.0171 | 3126.2553 |
| 3128.6670 | 3129.8079 | 3129.9247 |
| 3130.2178 | 3131.2425 | 3133.7514 |
| 3135.3627 | 3142.3944 | 3145.4499 |

----

Int B iso1 S=5/2

----

|          |          |          |
|----------|----------|----------|
| -11.1933 | 6.5270   | 13.8881  |
| 16.2652  | 25.3187  | 30.3606  |
| 35.3092  | 40.2948  | 42.9234  |
| 47.2396  | 49.3565  | 56.9891  |
| 62.7287  | 66.3973  | 69.8141  |
| 73.9301  | 77.5411  | 79.2042  |
| 81.5652  | 91.5499  | 93.0829  |
| 98.1650  | 101.7556 | 106.9674 |

|           |           |           |
|-----------|-----------|-----------|
| 108.4271  | 121.5331  | 128.9182  |
| 129.1542  | 153.8442  | 167.8117  |
| 182.9863  | 192.7390  | 200.2938  |
| 208.5981  | 215.3426  | 234.1675  |
| 240.6666  | 250.4616  | 258.4876  |
| 262.0753  | 265.8367  | 270.7964  |
| 282.7666  | 294.7850  | 303.6212  |
| 305.7036  | 306.0031  | 318.2115  |
| 321.2939  | 339.9533  | 345.9544  |
| 354.8728  | 368.2141  | 395.9147  |
| 399.1892  | 401.6855  | 402.4526  |
| 402.8485  | 411.1595  | 412.2056  |
| 417.9953  | 420.7039  | 426.9974  |
| 437.7703  | 464.5092  | 470.4179  |
| 485.1069  | 490.4659  | 499.9564  |
| 509.8644  | 522.8626  | 526.3056  |
| 533.7146  | 541.8948  | 551.2877  |
| 555.3537  | 571.9139  | 611.2136  |
| 611.5057  | 612.1337  | 612.9064  |
| 613.8227  | 622.8109  | 624.3793  |
| 628.6207  | 630.1035  | 631.0444  |
| 633.7072  | 639.0406  | 656.1098  |
| 663.9226  | 694.6084  | 697.0703  |
| 699.1843  | 700.0848  | 701.2503  |
| 714.7096  | 718.0689  | 727.7382  |
| 731.3851  | 741.4174  | 746.3283  |
| 749.3853  | 754.1306  | 760.4579  |
| 763.8788  | 771.9004  | 778.2072  |
| 780.5755  | 792.2537  | 796.7894  |
| 802.6722  | 823.7064  | 825.1950  |
| 828.9753  | 833.3350  | 835.1573  |
| 835.5267  | 853.0663  | 856.3453  |
| 868.1461  | 888.5325  | 891.0596  |
| 903.5387  | 905.0280  | 919.0861  |
| 925.2407  | 930.4186  | 932.9984  |
| 940.8469  | 943.9126  | 944.8148  |
| 947.0018  | 957.8878  | 960.1410  |
| 961.7116  | 962.0915  | 963.6105  |
| 964.0528  | 969.7759  | 975.2244  |
| 978.0759  | 979.6192  | 981.8558  |
| 982.8035  | 985.2944  | 987.8883  |
| 988.3466  | 989.0956  | 990.5537  |
| 995.7094  | 996.9083  | 1000.5347 |
| 1009.9550 | 1019.9201 | 1022.4386 |
| 1023.5047 | 1023.8474 | 1026.6234 |
| 1027.4772 | 1034.6802 | 1043.7404 |
| 1051.2350 | 1063.2911 | 1073.1659 |
| 1073.9788 | 1081.0028 | 1087.7973 |
| 1089.4824 | 1091.4811 | 1092.0699 |
| 1096.3732 | 1100.0843 | 1133.4719 |
| 1133.4984 | 1134.0285 | 1137.9648 |
| 1138.0615 | 1140.6400 | 1145.9770 |
| 1148.8941 | 1150.5886 | 1151.8110 |
| 1155.2845 | 1155.6324 | 1156.2674 |
| 1162.4594 | 1165.3704 | 1184.6660 |
| 1188.8775 | 1195.0679 | 1205.5552 |

|           |           |           |
|-----------|-----------|-----------|
| 1205.7903 | 1236.9009 | 1244.5214 |
| 1259.8702 | 1261.7604 | 1268.2193 |
| 1279.4992 | 1282.5230 | 1285.7440 |
| 1287.4138 | 1288.3898 | 1318.7700 |
| 1342.1496 | 1345.6642 | 1348.4385 |
| 1358.6859 | 1366.1144 | 1367.1691 |
| 1369.4524 | 1371.5384 | 1394.8943 |
| 1401.9562 | 1407.1661 | 1420.4787 |
| 1422.4777 | 1424.7472 | 1428.1754 |
| 1428.8184 | 1431.7379 | 1433.9767 |
| 1455.0015 | 1467.6904 | 1470.3292 |
| 1471.7551 | 1472.3479 | 1473.9116 |
| 1474.8350 | 1500.1574 | 1540.0985 |
| 1574.8008 | 1575.7946 | 1579.7089 |
| 1586.3610 | 1587.5915 | 1592.8501 |
| 1593.2737 | 1601.7692 | 1603.2067 |
| 1604.2583 | 1605.7485 | 1607.2385 |
| 1609.2674 | 1609.9105 | 1611.5455 |
| 2957.3751 | 3029.1481 | 3063.7532 |
| 3063.9039 | 3092.8822 | 3094.3395 |
| 3095.0488 | 3095.3119 | 3097.3856 |
| 3097.5813 | 3098.1819 | 3103.6141 |
| 3105.7039 | 3106.4012 | 3107.1419 |
| 3107.4515 | 3107.8971 | 3108.6871 |
| 3111.0629 | 3112.2152 | 3113.3486 |
| 3114.6559 | 3115.5814 | 3117.0656 |
| 3119.6504 | 3119.9350 | 3120.6321 |
| 3120.9096 | 3121.2810 | 3122.3502 |
| 3126.2331 | 3127.8771 | 3131.1566 |
| 3131.3977 | 3135.9977 | 3143.1747 |
| 3147.3416 | 3156.9691 | 3157.5090 |

----

Int B iso2 S=5/2

----

|          |          |          |
|----------|----------|----------|
| -14.9259 | 12.2770  | 23.0646  |
| 26.5505  | 35.0139  | 39.4483  |
| 44.4157  | 47.1175  | 48.5732  |
| 50.5814  | 53.4822  | 56.1746  |
| 60.3851  | 63.0286  | 67.6146  |
| 71.7240  | 75.2999  | 80.4263  |
| 85.2790  | 89.2971  | 93.8146  |
| 98.9879  | 110.2631 | 117.6744 |
| 124.3391 | 126.1983 | 128.8611 |
| 141.6578 | 169.3078 | 174.6693 |
| 180.0461 | 199.9155 | 205.5576 |
| 214.9623 | 218.0999 | 235.1579 |
| 241.3885 | 250.4612 | 251.2069 |
| 262.5647 | 269.7213 | 273.6854 |
| 281.2539 | 292.8532 | 303.4517 |
| 307.4090 | 311.8591 | 318.6025 |
| 334.7565 | 343.1433 | 348.1373 |
| 362.8221 | 372.5323 | 392.7758 |
| 396.1668 | 402.1933 | 403.4256 |
| 405.2876 | 405.7471 | 409.6774 |
| 412.9566 | 418.5024 | 422.4653 |
| 438.0278 | 464.1923 | 476.6691 |

|           |           |           |
|-----------|-----------|-----------|
| 485.0535  | 498.4177  | 500.5269  |
| 505.7518  | 516.4287  | 518.0595  |
| 527.8427  | 540.0076  | 544.3253  |
| 552.4837  | 585.3224  | 610.4575  |
| 611.6424  | 611.9119  | 612.3798  |
| 614.7730  | 623.7318  | 626.0762  |
| 627.9591  | 630.1483  | 631.7948  |
| 634.7155  | 636.5929  | 648.7185  |
| 662.8649  | 693.4111  | 694.3375  |
| 698.1849  | 698.2790  | 706.4375  |
| 711.8030  | 716.9294  | 724.9543  |
| 732.2638  | 747.4146  | 748.8683  |
| 751.4760  | 755.3003  | 758.8071  |
| 761.4830  | 772.7991  | 779.7898  |
| 783.1219  | 786.6034  | 791.3660  |
| 803.0299  | 816.2869  | 829.2502  |
| 831.6662  | 833.4221  | 839.6365  |
| 845.7081  | 847.3132  | 866.5000  |
| 867.6904  | 888.8498  | 889.3063  |
| 903.8965  | 905.2448  | 927.6920  |
| 928.2095  | 929.2965  | 930.1199  |
| 937.9180  | 943.8357  | 945.1133  |
| 948.8608  | 955.3122  | 956.6321  |
| 957.8514  | 961.3960  | 962.8447  |
| 964.1803  | 967.7791  | 977.4453  |
| 979.0566  | 979.8105  | 980.2523  |
| 981.0512  | 984.5168  | 988.2485  |
| 988.6667  | 989.0370  | 991.6470  |
| 995.0052  | 997.5450  | 1000.7915 |
| 1007.4279 | 1018.4809 | 1022.2343 |
| 1023.0423 | 1025.0024 | 1025.1699 |
| 1027.0264 | 1036.8663 | 1044.8993 |
| 1050.6938 | 1056.9555 | 1071.8503 |
| 1073.9571 | 1079.8601 | 1084.0757 |
| 1089.1989 | 1090.8928 | 1092.3803 |
| 1095.3420 | 1100.1052 | 1132.2015 |
| 1133.9104 | 1133.9920 | 1135.6858 |
| 1138.0430 | 1141.7680 | 1144.1510 |
| 1148.0778 | 1148.6911 | 1152.0565 |
| 1153.7156 | 1154.3437 | 1161.0351 |
| 1163.4237 | 1173.7622 | 1181.4677 |
| 1184.6390 | 1186.0023 | 1190.4217 |
| 1206.9801 | 1241.1850 | 1243.9518 |
| 1262.5221 | 1264.5590 | 1272.3137 |
| 1274.3239 | 1281.3500 | 1282.1117 |
| 1282.6731 | 1292.3181 | 1323.5941 |
| 1341.9886 | 1342.2716 | 1348.8900 |
| 1358.7975 | 1366.6321 | 1369.8914 |
| 1371.2654 | 1372.0705 | 1392.7232 |
| 1395.8632 | 1408.5401 | 1420.2714 |
| 1422.7970 | 1426.4621 | 1427.2771 |
| 1429.2884 | 1432.1669 | 1432.7684 |
| 1454.4213 | 1465.8852 | 1470.1631 |
| 1471.8771 | 1473.1578 | 1473.6149 |
| 1475.0266 | 1499.8196 | 1545.6244 |
| 1574.4289 | 1576.1093 | 1580.7852 |

|           |           |           |
|-----------|-----------|-----------|
| 1588.3019 | 1590.0002 | 1593.0931 |
| 1595.5598 | 1602.2068 | 1603.5122 |
| 1604.2881 | 1604.8451 | 1606.5229 |
| 1607.6069 | 1609.5823 | 1612.3590 |
| 2953.5818 | 3026.8775 | 3046.9249 |
| 3063.6905 | 3092.1705 | 3093.8768 |
| 3094.9128 | 3096.0313 | 3097.0041 |
| 3097.2680 | 3097.8719 | 3101.9081 |
| 3105.4154 | 3107.0574 | 3107.2147 |
| 3107.4004 | 3107.6100 | 3110.1392 |
| 3110.2193 | 3111.0769 | 3114.0306 |
| 3115.9627 | 3116.4832 | 3117.1684 |
| 3119.0488 | 3120.0319 | 3120.1372 |
| 3120.2909 | 3121.8083 | 3124.1547 |
| 3127.3039 | 3128.6429 | 3130.6251 |
| 3130.6863 | 3131.7527 | 3139.3644 |
| 3139.5391 | 3141.6803 | 3155.0622 |

----

Int C iso la S=3/2

----

|          |          |          |
|----------|----------|----------|
| -4.4611  | 5.0546   | 14.7133  |
| 15.9950  | 26.1974  | 30.1711  |
| 36.6264  | 39.3213  | 42.3052  |
| 44.9154  | 47.8405  | 48.5408  |
| 53.6823  | 59.3874  | 65.1412  |
| 65.9892  | 70.7049  | 72.6267  |
| 74.2246  | 78.4182  | 81.6789  |
| 89.6620  | 91.4298  | 95.5380  |
| 101.4369 | 109.5684 | 114.4676 |
| 116.6281 | 124.3799 | 131.9469 |
| 133.7351 | 143.4105 | 163.6444 |
| 170.1616 | 175.6536 | 181.5282 |
| 198.4906 | 205.5326 | 208.8194 |
| 215.5022 | 232.7235 | 234.8002 |
| 239.3250 | 245.7938 | 249.5383 |
| 262.5417 | 265.3088 | 270.6574 |
| 278.4570 | 284.0140 | 285.3867 |
| 289.0541 | 300.9034 | 309.2902 |
| 314.9967 | 320.8877 | 332.4242 |
| 343.8948 | 347.0997 | 361.6988 |
| 367.8223 | 383.9586 | 400.5913 |
| 401.9481 | 404.9762 | 405.3518 |
| 406.1402 | 410.3368 | 415.6508 |
| 418.6537 | 422.0903 | 432.0650 |
| 442.0292 | 456.1123 | 467.2943 |
| 475.0742 | 477.4924 | 481.2878 |
| 496.0432 | 506.3904 | 508.8703 |
| 517.5406 | 518.2325 | 535.4748 |
| 539.5775 | 546.9474 | 551.9164 |
| 580.6774 | 607.0926 | 611.7384 |
| 611.9476 | 613.3442 | 614.1741 |
| 616.3601 | 620.4543 | 623.7700 |
| 625.6059 | 631.1408 | 632.7624 |
| 635.1942 | 637.7555 | 645.0608 |
| 661.7576 | 663.5443 | 672.7646 |
| 693.6757 | 694.9240 | 695.7520 |



|           |           |           |
|-----------|-----------|-----------|
| 697.4004  | 700.6685  | 702.2586  |
| 707.2225  | 720.2305  | 729.9689  |
| 735.3641  | 737.3757  | 741.7032  |
| 747.3032  | 750.5073  | 752.5953  |
| 758.3949  | 761.2531  | 763.6262  |
| 779.5491  | 785.9940  | 797.9635  |
| 799.0214  | 804.7806  | 809.7633  |
| 818.2706  | 821.6941  | 828.7136  |
| 829.6546  | 833.0461  | 835.0599  |
| 838.4863  | 842.4003  | 854.7330  |
| 867.2922  | 877.0034  | 879.5993  |
| 886.1384  | 899.9846  | 912.8410  |
| 919.6068  | 921.1709  | 925.4846  |
| 926.7596  | 930.3483  | 939.6637  |
| 941.1438  | 941.7355  | 944.5380  |
| 952.7658  | 954.3356  | 954.5995  |
| 959.6959  | 962.0366  | 963.6609  |
| 965.3198  | 967.8671  | 968.2093  |
| 971.3153  | 974.5412  | 977.4346  |
| 978.0132  | 981.0271  | 981.9908  |
| 984.7254  | 985.2188  | 985.9218  |
| 986.7574  | 987.7013  | 989.1842  |
| 990.0412  | 1003.6547 | 1004.8509 |
| 1011.2870 | 1013.6283 | 1022.4084 |
| 1024.8878 | 1024.9451 | 1026.2829 |
| 1026.6665 | 1043.7731 | 1050.2824 |
| 1056.2539 | 1059.9364 | 1063.8894 |
| 1072.5640 | 1073.4230 | 1082.2096 |
| 1086.5506 | 1089.0166 | 1090.4185 |
| 1092.5311 | 1095.7579 | 1097.2820 |
| 1102.4403 | 1110.0311 | 1130.6644 |
| 1131.0273 | 1133.1587 | 1133.7565 |
| 1135.9881 | 1137.5978 | 1141.5429 |
| 1145.5409 | 1146.0881 | 1146.3496 |
| 1150.6274 | 1152.1125 | 1153.9977 |
| 1154.8218 | 1155.9618 | 1157.5527 |
| 1161.6440 | 1174.0894 | 1187.6630 |
| 1196.5133 | 1199.9257 | 1207.6322 |
| 1210.5443 | 1229.1470 | 1239.0358 |
| 1241.0490 | 1261.5563 | 1266.0203 |
| 1266.3756 | 1275.5833 | 1278.6886 |
| 1282.2426 | 1283.4994 | 1285.2964 |
| 1288.6127 | 1293.2696 | 1328.2832 |
| 1342.3792 | 1342.9259 | 1350.3840 |
| 1357.6111 | 1357.9204 | 1364.1038 |
| 1368.8102 | 1369.5418 | 1370.0808 |
| 1380.2891 | 1393.3657 | 1397.2487 |
| 1405.9205 | 1407.1364 | 1416.6012 |
| 1421.3501 | 1426.5680 | 1427.0215 |
| 1429.3049 | 1432.2491 | 1433.5705 |
| 1441.1785 | 1456.2917 | 1468.6431 |
| 1471.3650 | 1472.3169 | 1472.6022 |
| 1472.7959 | 1473.9884 | 1479.7441 |
| 1505.9603 | 1543.9518 | 1555.8838 |
| 1574.9020 | 1576.9352 | 1578.5906 |
| 1581.2887 | 1586.4793 | 1590.6545 |

|           |           |           |
|-----------|-----------|-----------|
| 1591.3859 | 1591.6690 | 1605.3626 |
| 1605.8582 | 1606.2899 | 1607.2608 |
| 1607.5240 | 1610.6110 | 1611.9011 |
| 1618.0875 | 2942.7012 | 2958.0757 |
| 2994.1902 | 3031.9160 | 3061.2176 |
| 3063.2056 | 3091.3513 | 3094.4781 |
| 3094.7602 | 3096.4447 | 3096.4939 |
| 3097.1590 | 3097.8828 | 3098.5625 |
| 3099.0936 | 3102.2099 | 3102.9480 |
| 3103.5771 | 3104.0083 | 3106.3016 |
| 3107.9004 | 3108.8450 | 3109.6580 |
| 3111.5265 | 3111.6831 | 3113.5537 |
| 3114.2561 | 3114.5699 | 3116.9509 |
| 3117.2125 | 3117.4266 | 3120.3254 |
| 3120.3617 | 3120.7503 | 3121.0011 |
| 3122.7513 | 3123.8497 | 3124.7227 |
| 3125.0135 | 3128.4742 | 3130.2568 |
| 3130.7945 | 3133.2853 | 3137.9736 |
| 3139.8237 | 3142.6085 | 3154.4188 |

----

Int C iso1b S=3/2

----

|          |          |          |
|----------|----------|----------|
| -7.6838  | 13.6507  | 23.8254  |
| 25.2974  | 30.4391  | 32.7393  |
| 36.6828  | 39.2559  | 43.4991  |
| 46.1797  | 52.2141  | 52.7570  |
| 58.0075  | 61.9496  | 63.7841  |
| 66.5903  | 72.6008  | 76.7985  |
| 77.5251  | 81.2287  | 85.3069  |
| 94.9436  | 100.0791 | 102.5874 |
| 110.0862 | 111.4788 | 112.5992 |
| 118.5347 | 128.0105 | 132.1282 |
| 140.0622 | 144.8797 | 160.3925 |
| 169.9012 | 172.3720 | 178.6633 |
| 194.1031 | 197.3130 | 210.6273 |
| 222.6882 | 227.9382 | 235.7959 |
| 242.9158 | 248.1656 | 250.8691 |
| 261.6103 | 265.2293 | 271.0539 |
| 281.5054 | 284.2947 | 287.4344 |
| 294.5784 | 301.1688 | 311.4364 |
| 315.1142 | 320.6035 | 333.4529 |
| 342.3693 | 346.0625 | 363.2036 |
| 373.0157 | 386.7237 | 397.6477 |
| 402.2893 | 403.3982 | 409.2471 |
| 409.7859 | 411.4053 | 414.7787 |
| 417.4565 | 419.7300 | 429.0973 |
| 432.8620 | 448.6672 | 466.5719 |
| 474.1220 | 475.2869 | 481.1483 |
| 494.9406 | 503.1237 | 504.5233 |
| 518.9644 | 520.2752 | 535.4176 |
| 544.9819 | 551.7859 | 558.7793 |
| 581.2857 | 602.5939 | 607.6986 |
| 611.6381 | 612.3571 | 613.3513 |
| 613.5717 | 616.4264 | 623.7860 |
| 625.9914 | 629.4493 | 631.5931 |
| 632.9872 | 635.2926 | 637.8722 |

|           |           |           |
|-----------|-----------|-----------|
| 660.3437  | 663.2658  | 670.1415  |
| 682.4488  | 690.6803  | 694.0042  |
| 696.4741  | 700.4295  | 704.4846  |
| 706.4484  | 722.0154  | 731.3388  |
| 736.2381  | 741.0822  | 745.8536  |
| 747.3731  | 749.3813  | 752.8070  |
| 757.6184  | 759.4806  | 764.2969  |
| 780.0440  | 785.1633  | 794.9251  |
| 798.4722  | 802.7011  | 809.6123  |
| 813.4597  | 823.0077  | 824.3142  |
| 828.6903  | 832.7259  | 837.0247  |
| 840.5475  | 841.4019  | 855.0124  |
| 867.3077  | 874.9098  | 879.1442  |
| 885.9467  | 899.7858  | 911.8022  |
| 918.2728  | 919.1488  | 924.4951  |
| 926.6803  | 932.3631  | 934.2062  |
| 940.1638  | 942.1767  | 944.7680  |
| 947.3599  | 954.1488  | 955.3823  |
| 956.0918  | 963.3078  | 964.4738  |
| 966.5336  | 967.8285  | 970.3989  |
| 972.4849  | 974.6153  | 974.8852  |
| 977.5801  | 979.1481  | 981.7269  |
| 983.2030  | 985.2975  | 986.9194  |
| 987.9015  | 988.5889  | 990.1001  |
| 990.4573  | 1004.5077 | 1005.0118 |
| 1010.9879 | 1016.2863 | 1022.9226 |
| 1024.7799 | 1025.0915 | 1026.7817 |
| 1028.7318 | 1045.8614 | 1048.9870 |
| 1055.6553 | 1059.8697 | 1064.0008 |
| 1072.2680 | 1075.2384 | 1082.4194 |
| 1085.3618 | 1088.8032 | 1090.2365 |
| 1091.8703 | 1092.6417 | 1097.2625 |
| 1102.0076 | 1128.9075 | 1130.9423 |
| 1133.1644 | 1133.5046 | 1133.6367 |
| 1136.5224 | 1138.0538 | 1140.3614 |
| 1145.3312 | 1147.3782 | 1149.5599 |
| 1150.4174 | 1152.2489 | 1153.4121 |
| 1154.4305 | 1154.7874 | 1159.9272 |
| 1161.7364 | 1173.9059 | 1183.5054 |
| 1195.6023 | 1199.6865 | 1207.3737 |
| 1215.7611 | 1231.5842 | 1238.4287 |
| 1241.0790 | 1261.9193 | 1263.9403 |
| 1267.6815 | 1275.6523 | 1278.5243 |
| 1285.4970 | 1287.7076 | 1287.8717 |
| 1288.6031 | 1296.7482 | 1329.4374 |
| 1341.8848 | 1344.0628 | 1351.0464 |
| 1357.9150 | 1360.3846 | 1364.1821 |
| 1366.5405 | 1369.3891 | 1370.2353 |
| 1371.3866 | 1393.1431 | 1398.0716 |
| 1402.2470 | 1406.4087 | 1417.1756 |
| 1421.3146 | 1426.2055 | 1427.1938 |
| 1428.2614 | 1432.7075 | 1433.4505 |
| 1442.0509 | 1456.9040 | 1468.9223 |
| 1471.8805 | 1472.2197 | 1472.3889 |
| 1472.9268 | 1474.7916 | 1477.7539 |
| 1508.5141 | 1547.0386 | 1558.3955 |

|           |           |           |
|-----------|-----------|-----------|
| 1575.7118 | 1577.4423 | 1580.3666 |
| 1580.9037 | 1585.9708 | 1591.0611 |
| 1591.1918 | 1593.0493 | 1604.9185 |
| 1606.0942 | 1606.2838 | 1607.1846 |
| 1607.6562 | 1610.5063 | 1612.7674 |
| 1620.4682 | 2893.8348 | 2958.7503 |
| 3026.3753 | 3032.3904 | 3059.9609 |
| 3064.0443 | 3091.5645 | 3094.2309 |
| 3094.8759 | 3096.0773 | 3096.8206 |
| 3097.9168 | 3098.0146 | 3098.1526 |
| 3100.6051 | 3101.5666 | 3102.9186 |
| 3104.2354 | 3106.1426 | 3106.5909 |
| 3107.8569 | 3110.2875 | 3111.3183 |
| 3114.6552 | 3115.0210 | 3117.2805 |
| 3118.1216 | 3118.1732 | 3118.3299 |
| 3118.5638 | 3120.2850 | 3120.6530 |
| 3121.3484 | 3121.5231 | 3123.1182 |
| 3123.6292 | 3127.5085 | 3128.2547 |
| 3129.4151 | 3130.9492 | 3130.9631 |
| 3131.5386 | 3133.4164 | 3136.0256 |
| 3143.8525 | 3146.7165 | 3155.1453 |

----

Int C iso2a S=3/2

----

|          |          |          |
|----------|----------|----------|
| -7.3625  | 20.4306  | 21.4539  |
| 22.4958  | 30.5327  | 34.2613  |
| 37.9941  | 40.7672  | 43.0434  |
| 47.7323  | 50.6540  | 54.2912  |
| 58.6178  | 60.6943  | 66.9626  |
| 70.6625  | 74.5099  | 76.9182  |
| 82.0120  | 84.0583  | 88.5189  |
| 90.7662  | 97.1670  | 98.5188  |
| 102.2508 | 108.5759 | 117.5801 |
| 121.7176 | 125.1011 | 126.2419 |
| 135.6187 | 143.2033 | 151.0148 |
| 163.9294 | 170.8527 | 184.4249 |
| 189.4073 | 194.4994 | 207.5267 |
| 218.3765 | 225.7421 | 231.7888 |
| 236.0845 | 254.5976 | 258.6878 |
| 267.3093 | 271.5194 | 273.9712 |
| 279.6057 | 286.5920 | 290.0544 |
| 303.6286 | 306.4902 | 314.9004 |
| 323.4074 | 327.3479 | 332.3445 |
| 340.4341 | 345.7004 | 350.7582 |
| 361.7743 | 381.1469 | 396.7595 |
| 400.5992 | 401.3955 | 406.6855 |
| 407.7646 | 413.0792 | 413.3024 |
| 417.3096 | 420.6741 | 436.0773 |
| 437.0018 | 463.3022 | 464.9424 |
| 474.6846 | 478.4341 | 483.0121 |
| 487.7876 | 506.7162 | 512.3961 |
| 515.7531 | 525.3885 | 532.5738 |
| 540.6214 | 541.7758 | 552.4365 |
| 568.2277 | 576.9748 | 605.9258 |
| 611.1549 | 613.2620 | 613.8854 |
| 614.7337 | 615.4463 | 625.2503 |

|           |           |           |
|-----------|-----------|-----------|
| 625.7315  | 628.3939  | 632.7252  |
| 633.6337  | 637.3658  | 643.2112  |
| 657.8643  | 664.2567  | 670.9108  |
| 681.7924  | 687.7828  | 695.3638  |
| 697.1481  | 698.0773  | 703.3139  |
| 706.5987  | 708.0165  | 716.3334  |
| 728.4005  | 735.1160  | 738.6518  |
| 750.0104  | 751.2222  | 753.8340  |
| 762.7722  | 763.6986  | 768.5239  |
| 777.6119  | 780.3745  | 788.2432  |
| 795.0429  | 801.4405  | 805.2742  |
| 808.5188  | 817.1460  | 826.0605  |
| 827.9542  | 832.2081  | 833.4255  |
| 836.1990  | 842.9629  | 861.1997  |
| 866.5450  | 881.5980  | 889.3984  |
| 891.1771  | 905.3234  | 909.3895  |
| 915.5281  | 918.0304  | 922.1241  |
| 927.6569  | 929.4550  | 937.1514  |
| 943.4040  | 947.9591  | 951.4317  |
| 952.2001  | 952.7492  | 956.2576  |
| 958.5888  | 959.4674  | 962.0420  |
| 964.3174  | 965.6231  | 967.8571  |
| 971.0059  | 975.8824  | 977.1404  |
| 977.9055  | 979.9914  | 982.7976  |
| 984.4960  | 987.2627  | 987.6895  |
| 988.5564  | 989.1628  | 991.8547  |
| 992.4340  | 998.3383  | 1004.9779 |
| 1007.9899 | 1014.9158 | 1023.1682 |
| 1025.5160 | 1026.2577 | 1028.2728 |
| 1030.9034 | 1034.2677 | 1042.7084 |
| 1047.8285 | 1052.2153 | 1059.1155 |
| 1062.2960 | 1074.1956 | 1075.0702 |
| 1077.9788 | 1081.4392 | 1086.4599 |
| 1089.8088 | 1092.2021 | 1098.2530 |
| 1099.1642 | 1101.8703 | 1131.6709 |
| 1133.4094 | 1135.4635 | 1135.8089 |
| 1137.1964 | 1138.6350 | 1139.2983 |
| 1145.0882 | 1146.7853 | 1150.1654 |
| 1152.7648 | 1154.5016 | 1154.7976 |
| 1157.0767 | 1160.6520 | 1161.8722 |
| 1166.5297 | 1180.0590 | 1185.8339 |
| 1199.5780 | 1205.0519 | 1206.9937 |
| 1220.2275 | 1235.9628 | 1238.8033 |
| 1243.2113 | 1263.0432 | 1263.4074 |
| 1269.8428 | 1278.4970 | 1281.2143 |
| 1284.9438 | 1286.3277 | 1288.9267 |
| 1289.6883 | 1304.0201 | 1327.6302 |
| 1342.1773 | 1345.9893 | 1349.3721 |
| 1359.0154 | 1360.5801 | 1366.8530 |
| 1369.6176 | 1371.4278 | 1371.8325 |
| 1391.8620 | 1396.7175 | 1400.6100 |
| 1405.0977 | 1409.0608 | 1418.6406 |
| 1418.9555 | 1422.0124 | 1428.4079 |
| 1428.7308 | 1434.0835 | 1434.8984 |
| 1440.6231 | 1460.0302 | 1470.3794 |
| 1470.6626 | 1471.9125 | 1473.6716 |

|           |           |           |
|-----------|-----------|-----------|
| 1474.1055 | 1474.7082 | 1476.4877 |
| 1510.6955 | 1547.9623 | 1560.0790 |
| 1575.5816 | 1575.7058 | 1577.9860 |
| 1579.1574 | 1587.4009 | 1591.0060 |
| 1592.1894 | 1594.7077 | 1601.3681 |
| 1605.7469 | 1605.9987 | 1607.8646 |
| 1608.2693 | 1610.3114 | 1611.0831 |
| 1621.1445 | 2950.3861 | 2957.9007 |
| 3031.5008 | 3031.7705 | 3064.2573 |
| 3075.7294 | 3091.1731 | 3092.3922 |
| 3095.3254 | 3095.9124 | 3096.4098 |
| 3097.0844 | 3097.1529 | 3100.9260 |
| 3101.7910 | 3102.0667 | 3102.8582 |
| 3103.2333 | 3103.3013 | 3105.6225 |
| 3105.7983 | 3106.9974 | 3107.8917 |
| 3110.4328 | 3110.6899 | 3111.6479 |
| 3112.1555 | 3114.4184 | 3115.4943 |
| 3115.8160 | 3118.1459 | 3118.2802 |
| 3118.6531 | 3120.3957 | 3121.6251 |
| 3121.9512 | 3123.4088 | 3123.6539 |
| 3125.0666 | 3127.9212 | 3127.9508 |
| 3129.3804 | 3130.9986 | 3138.1560 |
| 3144.5072 | 3146.7210 | 3158.7581 |

----

Int C iso2b S=3/2

----

|          |          |          |
|----------|----------|----------|
| 8.6085   | 14.8237  | 20.6804  |
| 23.8940  | 31.0649  | 32.5149  |
| 36.1309  | 40.3469  | 42.8916  |
| 44.2007  | 46.6075  | 56.1127  |
| 57.5264  | 59.9307  | 60.7381  |
| 70.0151  | 72.9029  | 79.3519  |
| 82.9188  | 83.8506  | 87.3698  |
| 90.2267  | 94.7377  | 96.3417  |
| 103.0703 | 113.1489 | 115.1325 |
| 120.8997 | 123.6552 | 127.0140 |
| 132.3057 | 138.3413 | 146.0631 |
| 153.6772 | 167.3753 | 181.6321 |
| 186.4312 | 194.8638 | 210.0294 |
| 215.3472 | 224.8631 | 231.2096 |
| 234.1757 | 238.0952 | 256.1380 |
| 260.5477 | 263.0326 | 267.1329 |
| 273.4943 | 273.7168 | 285.6100 |
| 291.5906 | 303.6418 | 312.1116 |
| 318.7464 | 323.4894 | 332.4441 |
| 341.1830 | 345.5484 | 358.4210 |
| 362.7329 | 379.2549 | 398.5184 |
| 401.8573 | 402.0743 | 408.5818 |
| 409.7477 | 413.6398 | 414.9796 |
| 415.4984 | 420.0524 | 426.5714 |
| 436.4389 | 451.5228 | 462.8240 |
| 473.2701 | 475.4534 | 478.7046 |
| 486.4941 | 510.4880 | 512.2422 |
| 515.9039 | 520.7566 | 531.7922 |
| 540.6575 | 552.1206 | 559.9791 |
| 576.7239 | 593.4199 | 606.8567 |

|           |           |           |                    |           |           |
|-----------|-----------|-----------|--------------------|-----------|-----------|
| 611.0618  | 612.9320  | 613.5747  | 1439.8157          | 1459.4611 | 1470.3712 |
| 614.3226  | 615.3412  | 624.5413  | 1471.4344          | 1472.2751 | 1473.3790 |
| 625.5821  | 629.4408  | 632.6221  | 1474.1445          | 1474.8177 | 1477.0761 |
| 634.5896  | 637.3988  | 649.3598  | 1510.3856          | 1544.5348 | 1559.4417 |
| 658.8531  | 664.6167  | 671.8261  | 1575.4744          | 1577.7263 | 1578.1690 |
| 680.6595  | 688.1462  | 695.9289  | 1578.3254          | 1587.5081 | 1590.9471 |
| 697.2909  | 699.2414  | 703.1025  | 1592.2962          | 1594.8897 | 1602.3557 |
| 707.3400  | 713.1055  | 716.8431  | 1605.5820          | 1606.0285 | 1607.8561 |
| 729.2376  | 734.5614  | 738.3566  | 1608.2571          | 1610.1638 | 1611.0371 |
| 750.3703  | 751.6181  | 753.0638  | 1620.9065          | 2873.9750 | 2957.8008 |
| 755.6195  | 763.2804  | 768.0212  | 2986.3834          | 3033.0619 | 3064.8540 |
| 777.8566  | 785.6816  | 794.7162  | 3079.8180          | 3094.6018 | 3095.5050 |
| 802.8989  | 805.4377  | 808.4293  | 3095.7216          | 3096.5245 | 3097.1776 |
| 815.4209  | 820.7930  | 826.6132  | 3097.6780          | 3100.5152 | 3100.9914 |
| 828.9319  | 831.6594  | 834.0315  | 3101.1459          | 3101.9992 | 3102.4893 |
| 838.0988  | 845.5238  | 860.7632  | 3102.7394          | 3105.2489 | 3105.9630 |
| 866.4870  | 874.8784  | 889.4924  | 3106.0620          | 3106.4997 | 3110.5204 |
| 891.0814  | 905.2935  | 907.0004  | 3112.1977          | 3112.5729 | 3113.7004 |
| 916.2807  | 918.8921  | 922.3651  | 3114.1907          | 3115.8045 | 3116.3073 |
| 928.2719  | 929.5758  | 933.7255  | 3117.4067          | 3119.2767 | 3120.6542 |
| 936.5480  | 942.9066  | 947.4255  | 3120.8082          | 3122.7876 | 3122.8385 |
| 951.4442  | 952.7090  | 955.3819  | 3123.5184          | 3123.9998 | 3124.1415 |
| 958.5023  | 962.4038  | 963.2228  | 3125.3308          | 3125.4070 | 3126.5604 |
| 967.3745  | 968.3327  | 968.3823  | 3129.2739          | 3129.8472 | 3132.3589 |
| 969.1932  | 975.2161  | 975.6772  | 3134.4409          | 3141.8067 | 3155.9410 |
| 977.8710  | 978.7627  | 981.5356  | ----               |           |           |
| 984.9843  | 986.9584  | 987.8479  | Int C iso la S=5/2 |           |           |
| 988.6247  | 990.1593  | 996.0484  | ----               |           |           |
| 999.7021  | 1005.0800 | 1008.3081 | -8.2468            | 10.5213   | 14.6453   |
| 1013.1607 | 1023.4681 | 1026.0637 | 20.2289            | 23.4762   | 33.3565   |
| 1026.9953 | 1027.6116 | 1029.7388 | 37.0148            | 39.3759   | 40.5325   |
| 1036.0470 | 1042.7855 | 1043.2664 | 41.5243            | 46.0893   | 49.8913   |
| 1049.4109 | 1052.6966 | 1061.9907 | 52.3426            | 58.2171   | 63.4308   |
| 1071.3761 | 1074.2647 | 1075.1764 | 67.0338            | 67.4632   | 71.1272   |
| 1075.6820 | 1081.7940 | 1086.8473 | 73.0347            | 79.3099   | 83.0264   |
| 1088.0006 | 1098.4750 | 1099.1362 | 89.8696            | 90.6606   | 97.0359   |
| 1100.0746 | 1104.9630 | 1130.2766 | 99.1764            | 106.2276  | 112.6533  |
| 1134.0792 | 1135.7544 | 1136.1616 | 118.3944           | 124.0145  | 130.5601  |
| 1136.6555 | 1138.8821 | 1139.0442 | 135.8214           | 141.6744  | 164.2637  |
| 1146.2090 | 1147.4410 | 1147.7036 | 170.6357           | 173.9251  | 181.6077  |
| 1149.6991 | 1153.0235 | 1154.8313 | 199.0313           | 204.6849  | 207.6427  |
| 1155.9541 | 1159.7701 | 1160.1387 | 217.8818           | 223.2991  | 232.9108  |
| 1165.7385 | 1179.7411 | 1191.7868 | 237.7931           | 243.8007  | 246.8439  |
| 1196.8531 | 1204.3446 | 1206.4596 | 262.4970           | 265.5814  | 271.2698  |
| 1210.5305 | 1235.7104 | 1239.2684 | 275.7762           | 284.1400  | 286.3619  |
| 1242.8431 | 1262.8147 | 1262.9912 | 288.0960           | 300.8202  | 306.0311  |
| 1270.8521 | 1279.1732 | 1279.4788 | 312.7901           | 320.9632  | 330.5853  |
| 1281.8018 | 1284.7949 | 1288.7398 | 344.8507           | 347.5187  | 360.2559  |
| 1288.9160 | 1291.5003 | 1327.6650 | 365.1099           | 378.6364  | 399.1819  |
| 1342.9714 | 1345.4295 | 1349.3113 | 400.7917           | 403.9268  | 404.1000  |
| 1357.8016 | 1359.0080 | 1366.8076 | 405.2328           | 409.2478  | 413.6320  |
| 1369.0352 | 1370.8793 | 1371.3400 | 418.3829           | 422.7515  | 430.5701  |
| 1372.1944 | 1391.6348 | 1397.3440 | 437.7748           | 456.9771  | 467.2211  |
| 1401.3676 | 1410.5544 | 1418.0854 | 474.7399           | 478.0933  | 480.5401  |
| 1418.9711 | 1422.8577 | 1428.0751 | 495.4334           | 506.8768  | 509.1313  |
| 1428.9298 | 1433.8166 | 1434.1309 | 517.1288           | 519.1870  | 535.5059  |

|           |           |           |
|-----------|-----------|-----------|
| 538.8716  | 546.7564  | 552.2153  |
| 579.5981  | 606.4985  | 611.7157  |
| 611.8947  | 613.1198  | 614.1556  |
| 616.2234  | 620.0001  | 623.4639  |
| 626.0293  | 630.6795  | 632.7961  |
| 635.2427  | 637.0966  | 645.8713  |
| 660.9930  | 663.2157  | 671.5209  |
| 693.0325  | 695.1511  | 695.3573  |
| 699.3649  | 699.7461  | 706.7184  |
| 707.2497  | 718.6722  | 728.9385  |
| 736.2063  | 738.8747  | 741.5769  |
| 746.9454  | 750.7960  | 752.0512  |
| 760.3228  | 762.1160  | 763.8798  |
| 779.2627  | 785.7259  | 797.4888  |
| 798.3454  | 804.8542  | 811.8812  |
| 819.1154  | 820.7917  | 828.5991  |
| 832.1978  | 832.3192  | 834.7873  |
| 837.4855  | 842.0398  | 854.7674  |
| 867.1535  | 878.8919  | 882.8042  |
| 885.7955  | 898.6840  | 911.2613  |
| 919.1665  | 920.4861  | 926.1761  |
| 929.3588  | 931.4610  | 938.8407  |
| 941.0493  | 941.7918  | 944.4635  |
| 953.6100  | 953.7984  | 955.8140  |
| 959.4382  | 960.0767  | 962.7642  |
| 964.7639  | 967.6483  | 968.8657  |
| 973.2959  | 974.3551  | 975.4311  |
| 977.1946  | 980.1522  | 981.1755  |
| 982.4382  | 984.8532  | 985.2695  |
| 986.6520  | 987.5811  | 989.0619  |
| 989.9445  | 1003.2534 | 1004.5328 |
| 1011.3888 | 1013.3722 | 1022.2177 |
| 1024.6361 | 1024.7406 | 1026.1525 |
| 1026.6459 | 1043.0082 | 1050.9121 |
| 1057.7995 | 1061.8014 | 1063.6333 |
| 1072.2827 | 1073.2771 | 1083.8514 |
| 1085.9120 | 1089.3435 | 1092.0582 |
| 1093.3919 | 1094.4083 | 1096.4383 |
| 1101.8123 | 1119.4374 | 1130.5246 |
| 1131.4322 | 1132.9066 | 1133.3589 |
| 1135.7658 | 1137.4049 | 1141.8341 |
| 1145.0469 | 1145.4698 | 1147.3188 |
| 1150.4518 | 1151.7543 | 1153.1305 |
| 1154.4830 | 1155.1550 | 1158.1310 |
| 1161.6925 | 1172.6240 | 1186.8971 |
| 1196.6371 | 1200.0498 | 1207.6176 |
| 1213.3035 | 1226.0672 | 1238.9554 |
| 1241.0613 | 1260.0037 | 1263.8345 |
| 1266.1397 | 1275.3517 | 1278.2881 |
| 1283.2336 | 1285.8437 | 1286.1662 |
| 1288.0566 | 1296.8211 | 1328.1472 |
| 1342.0592 | 1343.1581 | 1350.2319 |
| 1357.6484 | 1359.6964 | 1364.0088 |
| 1368.4980 | 1369.5802 | 1370.3150 |
| 1389.2822 | 1393.6785 | 1397.2627 |
| 1406.6574 | 1410.2500 | 1415.6929 |

|           |           |           |
|-----------|-----------|-----------|
| 1421.3291 | 1426.4392 | 1426.7744 |
| 1429.3190 | 1432.0485 | 1433.2799 |
| 1442.1403 | 1456.2983 | 1468.5896 |
| 1471.0851 | 1472.0809 | 1472.2618 |
| 1472.9108 | 1473.2033 | 1483.3199 |
| 1504.9745 | 1544.9014 | 1554.7637 |
| 1574.8672 | 1576.6465 | 1579.1466 |
| 1581.0005 | 1585.9543 | 1590.6384 |
| 1591.2379 | 1591.6908 | 1605.2620 |
| 1606.1002 | 1606.1380 | 1607.0501 |
| 1607.6101 | 1610.3116 | 1611.5833 |
| 1617.1260 | 2927.5943 | 2957.8964 |
| 2999.6498 | 3031.7106 | 3060.9338 |
| 3062.8543 | 3094.4218 | 3094.5409 |
| 3094.8110 | 3096.1641 | 3096.4756 |
| 3097.2142 | 3097.7189 | 3098.6863 |
| 3101.0094 | 3101.9526 | 3102.9193 |
| 3103.5724 | 3103.7531 | 3105.7526 |
| 3107.7760 | 3109.5453 | 3110.7548 |
| 3111.3125 | 3112.8826 | 3113.6563 |
| 3116.1033 | 3116.3861 | 3117.0097 |
| 3118.1210 | 3119.9690 | 3120.1738 |
| 3120.6161 | 3121.2406 | 3123.4724 |
| 3123.5704 | 3124.4833 | 3124.6934 |
| 3125.0476 | 3126.8343 | 3127.7374 |
| 3128.4246 | 3130.0961 | 3137.7093 |
| 3138.4871 | 3144.1083 | 3154.5835 |

----

Int C iso1b S=5/2

----

|          |          |          |
|----------|----------|----------|
| -9.9704  | 13.4448  | 22.5506  |
| 26.1628  | 31.1236  | 35.4794  |
| 37.0273  | 38.7819  | 43.8475  |
| 44.2329  | 51.7240  | 53.0014  |
| 56.3784  | 61.9967  | 63.6918  |
| 66.5880  | 71.8648  | 76.3558  |
| 78.4988  | 80.7360  | 84.6431  |
| 94.1303  | 101.0304 | 102.9538 |
| 109.4123 | 110.4480 | 113.2255 |
| 118.6859 | 126.8030 | 131.6056 |
| 138.3956 | 143.9758 | 158.9150 |
| 169.5538 | 171.5840 | 178.3826 |
| 191.2492 | 196.4906 | 207.6527 |
| 215.4027 | 226.2361 | 233.5121 |
| 241.8792 | 247.1944 | 249.9185 |
| 260.6211 | 265.3962 | 269.9969 |
| 280.3567 | 283.3317 | 286.4227 |
| 294.5855 | 300.7471 | 311.0087 |
| 314.1857 | 320.5597 | 332.4420 |
| 343.0152 | 345.8908 | 363.7628 |
| 371.8647 | 385.0146 | 395.2845 |
| 401.5799 | 403.6671 | 408.9617 |
| 409.7956 | 410.6414 | 413.3697 |
| 417.4732 | 419.4148 | 427.5552 |
| 429.3953 | 448.3133 | 466.4541 |
| 472.5040 | 474.2713 | 479.5633 |

|           |           |           |
|-----------|-----------|-----------|
| 494.5289  | 502.6091  | 504.3330  |
| 518.1455  | 520.3321  | 535.3937  |
| 545.0579  | 551.6960  | 558.0067  |
| 581.2626  | 596.8694  | 607.3378  |
| 611.6569  | 612.2766  | 613.2773  |
| 613.5647  | 616.4261  | 623.5871  |
| 625.9903  | 629.5086  | 631.6072  |
| 632.7366  | 635.3664  | 637.6994  |
| 659.5397  | 662.7787  | 668.7368  |
| 689.2352  | 692.4644  | 693.9171  |
| 696.2979  | 700.7729  | 704.2443  |
| 706.3060  | 720.8896  | 731.0661  |
| 735.9621  | 740.7050  | 744.7080  |
| 747.2375  | 749.2686  | 753.0401  |
| 759.0005  | 760.4184  | 764.3481  |
| 779.9764  | 784.3476  | 794.6017  |
| 797.5308  | 802.7260  | 809.5318  |
| 817.2959  | 822.6897  | 824.8149  |
| 828.8330  | 833.0086  | 837.3424  |
| 840.4519  | 841.3321  | 854.9137  |
| 866.9933  | 876.8029  | 881.5904  |
| 885.5355  | 899.5372  | 911.8492  |
| 916.3085  | 918.7871  | 919.6859  |
| 925.7513  | 932.3558  | 933.6466  |
| 939.9228  | 942.2034  | 944.4496  |
| 950.1356  | 955.1231  | 955.4783  |
| 955.9435  | 963.4501  | 964.7068  |
| 966.5403  | 967.7835  | 970.8708  |
| 973.5487  | 974.3643  | 975.6039  |
| 977.3083  | 979.3461  | 981.6764  |
| 983.0821  | 985.3022  | 986.8888  |
| 987.9525  | 988.3505  | 990.1438  |
| 990.8793  | 1004.5171 | 1005.7006 |
| 1011.0047 | 1016.4012 | 1022.9097 |
| 1024.7177 | 1025.0331 | 1026.5171 |
| 1028.2529 | 1046.0003 | 1048.8985 |
| 1054.9435 | 1061.7081 | 1063.2746 |
| 1072.1884 | 1074.3904 | 1083.0194 |
| 1085.5942 | 1088.9721 | 1090.1466 |
| 1091.8571 | 1092.7045 | 1096.2973 |
| 1100.4192 | 1131.0369 | 1132.9335 |
| 1133.4988 | 1133.5987 | 1133.9070 |
| 1136.4010 | 1138.0705 | 1139.9042 |
| 1144.8569 | 1146.5101 | 1149.2735 |
| 1150.9703 | 1151.9255 | 1152.8349 |
| 1154.4216 | 1154.8322 | 1159.2795 |
| 1161.8062 | 1172.9111 | 1181.3877 |
| 1197.1321 | 1199.8790 | 1207.3691 |
| 1208.8540 | 1229.5981 | 1237.7980 |
| 1241.2215 | 1261.9066 | 1263.7063 |
| 1267.5995 | 1275.0102 | 1278.3298 |
| 1285.5949 | 1286.2631 | 1287.3673 |
| 1287.8609 | 1296.7973 | 1329.6192 |
| 1341.8409 | 1344.0280 | 1351.0499 |
| 1357.4255 | 1358.0409 | 1361.5045 |
| 1364.2431 | 1369.3755 | 1369.8138 |

|           |           |           |
|-----------|-----------|-----------|
| 1370.9705 | 1393.2587 | 1398.2965 |
| 1404.5657 | 1406.3768 | 1417.0967 |
| 1421.4608 | 1426.1238 | 1427.1970 |
| 1428.1472 | 1432.5148 | 1433.3887 |
| 1442.6045 | 1457.0018 | 1468.7054 |
| 1471.6214 | 1472.0521 | 1472.2461 |
| 1472.8458 | 1474.3500 | 1478.9840 |
| 1508.5736 | 1547.8515 | 1558.3265 |
| 1575.7301 | 1577.3539 | 1580.8429 |
| 1581.0790 | 1585.8741 | 1590.8960 |
| 1591.0391 | 1592.6923 | 1604.8886 |
| 1606.1873 | 1606.2638 | 1607.0346 |
| 1607.2207 | 1610.4185 | 1612.4409 |
| 1620.5758 | 2901.7750 | 2958.7006 |
| 3032.4779 | 3033.2056 | 3063.8679 |
| 3067.1072 | 3093.0441 | 3094.0382 |
| 3094.6722 | 3095.8776 | 3096.4541 |
| 3097.4447 | 3097.6827 | 3097.7189 |
| 3101.5430 | 3102.4266 | 3102.8317 |
| 3104.0149 | 3105.9212 | 3106.3305 |
| 3107.6231 | 3109.6227 | 3111.2981 |
| 3114.2782 | 3114.8303 | 3116.0966 |
| 3117.5063 | 3117.9815 | 3118.7267 |
| 3118.8879 | 3120.0234 | 3120.4184 |
| 3121.0967 | 3121.3496 | 3122.9698 |
| 3125.7965 | 3126.4261 | 3127.9791 |
| 3130.1125 | 3130.3978 | 3131.1129 |
| 3131.6527 | 3133.7607 | 3135.1303 |
| 3143.9063 | 3146.4562 | 3154.8160 |

----

Int C iso2a S=5/2

----

|          |          |          |
|----------|----------|----------|
| 9.1170   | 16.2714  | 23.8487  |
| 27.4567  | 28.5208  | 34.3794  |
| 37.1893  | 43.1784  | 46.0528  |
| 49.7966  | 58.0817  | 58.6244  |
| 61.8772  | 67.2577  | 70.1405  |
| 73.4483  | 75.7536  | 77.9017  |
| 81.2942  | 84.7667  | 86.7862  |
| 91.1640  | 93.9955  | 99.4684  |
| 104.8881 | 111.5124 | 118.7229 |
| 120.2254 | 126.6591 | 127.9883 |
| 132.0111 | 144.4067 | 147.1840 |
| 157.9054 | 170.1274 | 179.6029 |
| 190.2409 | 198.8001 | 209.5166 |
| 214.5607 | 229.0302 | 229.3458 |
| 235.0404 | 241.1087 | 255.6552 |
| 262.6782 | 263.9659 | 268.8722 |
| 271.3950 | 274.6433 | 282.9157 |
| 287.1790 | 300.2102 | 305.0029 |
| 320.4999 | 323.5916 | 325.5898 |
| 337.4582 | 347.6808 | 353.9903 |
| 362.2887 | 374.1729 | 392.4228 |
| 398.7786 | 401.6807 | 405.8231 |
| 406.9290 | 408.4296 | 412.1009 |
| 412.4848 | 419.4539 | 434.2377 |

|           |           |           |
|-----------|-----------|-----------|
| 438.7362  | 463.3438  | 473.0111  |
| 473.8699  | 474.4903  | 482.3639  |
| 485.3045  | 508.3546  | 512.2636  |
| 515.4299  | 517.3582  | 531.8667  |
| 540.8385  | 551.6359  | 553.6425  |
| 566.2070  | 576.7453  | 605.5948  |
| 611.0067  | 612.8407  | 613.4857  |
| 614.6445  | 615.5850  | 625.2589  |
| 625.6929  | 630.3136  | 631.1091  |
| 634.7514  | 638.7610  | 643.3788  |
| 654.5130  | 662.2983  | 670.9235  |
| 681.6297  | 686.6574  | 692.8377  |
| 698.0627  | 699.1312  | 700.7274  |
| 707.6614  | 714.6651  | 729.2088  |
| 734.2094  | 735.4213  | 739.0548  |
| 750.3573  | 751.2099  | 755.1680  |
| 760.7570  | 763.9701  | 767.8988  |
| 779.8420  | 784.1851  | 787.7006  |
| 789.0109  | 797.8235  | 801.9811  |
| 814.6880  | 816.0326  | 823.8265  |
| 827.4944  | 830.3821  | 833.6655  |
| 837.2603  | 843.7273  | 858.8650  |
| 866.4084  | 885.8431  | 889.3250  |
| 895.1012  | 902.3390  | 906.0497  |
| 918.1506  | 918.8241  | 922.1569  |
| 927.5812  | 929.4937  | 936.8226  |
| 940.6845  | 941.9183  | 947.1072  |
| 952.6937  | 955.1801  | 956.3158  |
| 956.6345  | 962.3210  | 962.8474  |
| 966.8872  | 967.8881  | 969.0835  |
| 974.9995  | 975.9479  | 977.2931  |
| 977.8140  | 979.7885  | 982.7802  |
| 983.2252  | 987.3166  | 988.1140  |
| 989.5610  | 990.2503  | 992.1495  |
| 1001.6839 | 1003.1541 | 1006.4223 |
| 1008.3915 | 1017.4037 | 1023.9672 |
| 1025.6358 | 1025.9921 | 1026.2542 |
| 1028.1647 | 1037.9776 | 1041.9789 |
| 1050.3176 | 1052.7442 | 1056.3277 |
| 1071.1174 | 1071.4655 | 1073.5856 |
| 1075.1622 | 1078.6800 | 1088.7377 |
| 1089.6422 | 1092.6303 | 1098.5781 |
| 1099.2831 | 1104.9669 | 1131.3860 |
| 1132.7127 | 1133.5197 | 1134.9088 |
| 1135.6720 | 1138.8317 | 1139.7128 |
| 1146.8593 | 1147.3585 | 1151.2367 |
| 1151.4253 | 1154.0564 | 1154.4761 |
| 1156.8168 | 1157.5064 | 1160.7231 |
| 1163.6357 | 1171.1451 | 1190.4427 |
| 1205.4474 | 1206.3013 | 1207.1893 |
| 1213.2146 | 1235.8508 | 1236.4690 |
| 1240.7890 | 1263.8966 | 1264.8377 |
| 1273.6020 | 1277.4964 | 1281.9511 |
| 1284.6477 | 1286.4984 | 1289.4340 |
| 1295.8651 | 1317.3648 | 1330.6601 |
| 1342.2406 | 1349.2056 | 1350.0811 |

|           |           |           |
|-----------|-----------|-----------|
| 1359.5741 | 1364.1424 | 1367.0889 |
| 1369.0129 | 1371.5455 | 1373.1957 |
| 1391.8125 | 1392.5900 | 1402.0492 |
| 1403.3564 | 1409.0625 | 1418.8533 |
| 1419.2545 | 1423.3255 | 1427.6597 |
| 1430.3299 | 1433.2943 | 1434.1136 |
| 1441.3293 | 1459.5744 | 1469.8084 |
| 1471.8526 | 1472.6454 | 1473.4757 |
| 1473.6035 | 1474.3247 | 1478.9324 |
| 1513.0266 | 1550.3634 | 1561.2889 |
| 1577.1753 | 1578.0906 | 1578.1534 |
| 1580.6891 | 1587.0611 | 1591.9788 |
| 1592.3723 | 1594.6535 | 1602.9346 |
| 1605.3039 | 1606.1573 | 1608.1634 |
| 1608.4189 | 1610.6807 | 1611.6577 |
| 1624.7773 | 2922.9371 | 2958.8406 |
| 2990.4225 | 3032.8293 | 3065.6608 |
| 3084.1176 | 3091.5587 | 3092.8386 |
| 3095.8311 | 3096.1387 | 3097.0396 |
| 3100.2005 | 3100.4138 | 3100.6583 |
| 3101.2870 | 3102.4779 | 3103.6473 |
| 3104.0800 | 3105.7974 | 3105.8027 |
| 3105.9019 | 3106.2333 | 3107.5944 |
| 3111.9481 | 3112.1439 | 3114.0883 |
| 3114.4752 | 3115.9021 | 3117.3175 |
| 3118.2027 | 3120.7046 | 3120.8740 |
| 3122.3642 | 3122.4338 | 3123.7634 |
| 3124.1228 | 3125.8223 | 3128.6078 |
| 3129.3744 | 3130.7256 | 3133.4373 |
| 3135.5236 | 3136.9241 | 3137.6185 |
| 3139.9816 | 3144.6874 | 3151.9967 |

----

Int C iso2b S=5/2

----

|          |          |          |
|----------|----------|----------|
| 7.3912   | 12.6448  | 20.9493  |
| 24.4065  | 31.5932  | 32.8288  |
| 34.9635  | 39.5662  | 42.8470  |
| 43.4514  | 46.4797  | 56.0217  |
| 57.0887  | 60.1930  | 61.2808  |
| 70.6039  | 73.4357  | 78.9148  |
| 83.0969  | 84.1097  | 87.9216  |
| 90.2204  | 94.8096  | 96.5693  |
| 102.8519 | 113.6597 | 114.6490 |
| 121.4648 | 122.8069 | 127.1422 |
| 132.0731 | 137.9840 | 146.0088 |
| 153.8994 | 167.8539 | 180.9427 |
| 186.7547 | 195.5254 | 211.4619 |
| 215.5798 | 225.5728 | 228.3443 |
| 232.5126 | 237.0874 | 255.5669 |
| 259.9290 | 262.6446 | 266.2321 |
| 272.9150 | 273.0944 | 285.3500 |
| 291.1539 | 303.5303 | 312.0743 |
| 317.8649 | 323.3921 | 331.1152 |
| 340.5614 | 346.0892 | 357.4929 |
| 362.6189 | 377.5514 | 398.2466 |
| 401.9610 | 402.2334 | 408.7105 |

|           |           |           |                   |           |           |
|-----------|-----------|-----------|-------------------|-----------|-----------|
| 409.7785  | 414.1626  | 414.6775  | 1288.7241         | 1291.5771 | 1327.9175 |
| 415.1161  | 420.0452  | 424.9472  | 1343.0684         | 1345.6037 | 1349.3555 |
| 436.8073  | 448.3451  | 462.7735  | 1358.4159         | 1359.0216 | 1364.9650 |
| 473.9175  | 475.3227  | 478.0901  | 1366.9115         | 1368.9801 | 1371.3669 |
| 486.3008  | 510.5616  | 512.2902  | 1372.2519         | 1391.5370 | 1397.6991 |
| 516.1922  | 520.0401  | 531.6136  | 1402.2835         | 1410.6114 | 1418.0128 |
| 540.5978  | 552.0479  | 559.9453  | 1418.9465         | 1422.8939 | 1427.9753 |
| 576.6097  | 593.7069  | 606.9117  | 1429.0355         | 1433.6843 | 1433.9776 |
| 611.0670  | 612.9891  | 613.5915  | 1440.1837         | 1459.4085 | 1470.3057 |
| 614.3629  | 615.3540  | 624.5999  | 1471.6074         | 1472.2761 | 1473.2661 |
| 625.4876  | 629.4293  | 632.4987  | 1474.0849         | 1474.8074 | 1477.5394 |
| 634.7202  | 637.2766  | 650.8964  | 1510.4683         | 1545.4222 | 1559.4504 |
| 658.7164  | 664.3314  | 671.6446  | 1575.4910         | 1577.7796 | 1578.6253 |
| 682.4130  | 690.1347  | 695.5880  | 1578.7517         | 1587.4727 | 1591.0254 |
| 697.3385  | 699.9831  | 702.9146  | 1592.2419         | 1594.8108 | 1602.2945 |
| 707.7727  | 714.1096  | 716.6420  | 1605.4645         | 1605.9504 | 1607.8594 |
| 729.0355  | 734.3033  | 738.3395  | 1608.2114         | 1610.1961 | 1610.9505 |
| 750.3866  | 751.6201  | 755.0518  | 1621.0889         | 2874.0759 | 2957.8230 |
| 755.9130  | 763.3182  | 767.9445  | 2985.2948         | 3033.1668 | 3064.9331 |
| 777.9919  | 784.6883  | 794.3400  | 3078.3752         | 3095.1018 | 3095.5622 |
| 802.4361  | 805.3524  | 808.9902  | 3095.5681         | 3096.4250 | 3097.0522 |
| 815.2948  | 821.2755  | 826.8385  | 3097.7890         | 3100.0713 | 3100.3649 |
| 828.9652  | 831.8517  | 834.4897  | 3101.1038         | 3103.0440 | 3103.4155 |
| 838.2847  | 845.0260  | 860.6964  | 3105.2221         | 3105.9145 | 3105.9535 |
| 866.4151  | 877.4121  | 889.2059  | 3106.4355         | 3106.8808 | 3110.2619 |
| 890.6937  | 904.9605  | 906.7755  | 3112.0558         | 3112.5875 | 3114.1235 |
| 916.3629  | 919.1035  | 921.8352  | 3114.4727         | 3115.8644 | 3116.2388 |
| 926.3264  | 928.9546  | 929.4422  | 3118.8605         | 3119.3680 | 3120.6205 |
| 936.2323  | 942.8554  | 947.2443  | 3121.7575         | 3121.9156 | 3123.4009 |
| 952.2135  | 952.7226  | 954.8571  | 3123.6863         | 3123.9964 | 3125.3917 |
| 958.4885  | 962.4725  | 963.3935  | 3125.6081         | 3126.1265 | 3126.2046 |
| 967.3490  | 969.0533  | 969.0964  | 3130.5264         | 3130.6652 | 3132.6176 |
| 970.1536  | 974.9646  | 975.5351  | 3134.9977         | 3142.0709 | 3154.6496 |
| 977.7697  | 978.9511  | 981.5508  | ----              |           |           |
| 984.6533  | 986.9847  | 987.8321  | Int D iso1a S=3/2 |           |           |
| 988.8046  | 990.2085  | 995.3097  | ----              |           |           |
| 999.8655  | 1005.1497 | 1008.2952 | -5.4071           | 12.0778   | 21.9999   |
| 1013.4718 | 1023.4601 | 1026.0653 | 24.6382           | 29.3044   | 32.7460   |
| 1026.9806 | 1027.4858 | 1029.5417 | 37.5110           | 42.4327   | 47.4773   |
| 1036.1587 | 1040.2079 | 1043.5539 | 50.9842           | 52.8848   | 58.9597   |
| 1049.4603 | 1052.8371 | 1060.6128 | 60.4300           | 64.0351   | 66.0245   |
| 1073.3697 | 1074.4175 | 1074.9772 | 68.2176           | 73.6035   | 77.9584   |
| 1075.3556 | 1080.5548 | 1086.8341 | 80.9224           | 82.2277   | 85.2199   |
| 1087.9870 | 1098.5031 | 1098.7030 | 87.6074           | 98.9376   | 99.7069   |
| 1103.8781 | 1107.0445 | 1130.6441 | 103.2514          | 104.8072  | 113.8755  |
| 1134.0401 | 1135.6372 | 1136.0566 | 116.5803          | 125.0004  | 126.0972  |
| 1136.5192 | 1138.8838 | 1139.0257 | 138.1954          | 141.1871  | 145.9867  |
| 1146.2325 | 1147.5841 | 1148.1100 | 173.6766          | 183.8097  | 186.2692  |
| 1149.6646 | 1152.9381 | 1154.6094 | 191.8846          | 201.4178  | 206.9283  |
| 1155.9176 | 1159.4861 | 1159.8480 | 216.8254          | 222.8654  | 228.8396  |
| 1165.5892 | 1179.1450 | 1191.2564 | 234.5445          | 242.2457  | 248.6101  |
| 1195.8626 | 1204.3092 | 1205.9642 | 254.3359          | 264.1041  | 268.5898  |
| 1206.4950 | 1235.6431 | 1239.2548 | 278.5888          | 279.4784  | 287.6961  |
| 1241.8341 | 1262.6565 | 1262.7958 | 298.0900          | 304.7381  | 316.1309  |
| 1270.9978 | 1277.2048 | 1279.2260 | 321.0595          | 326.3642  | 327.4597  |
| 1282.0952 | 1285.0465 | 1288.4835 | 334.7425          | 339.6930  | 365.2543  |



|           |           |           |                   |           |           |
|-----------|-----------|-----------|-------------------|-----------|-----------|
| 366.0349  | 371.1329  | 380.6421  | 1266.1419         | 1270.9878 | 1279.6878 |
| 395.7351  | 399.8300  | 401.7253  | 1284.5357         | 1285.6352 | 1288.9432 |
| 404.1347  | 406.2528  | 406.9009  | 1289.5627         | 1290.2670 | 1329.5804 |
| 411.7956  | 412.8377  | 416.7352  | 1339.0151         | 1344.9698 | 1345.4400 |
| 434.3860  | 466.6689  | 467.6074  | 1352.3552         | 1360.6603 | 1366.6229 |
| 469.6858  | 476.1739  | 484.1763  | 1368.2549         | 1368.9505 | 1371.6523 |
| 491.4150  | 498.4851  | 509.0447  | 1378.2218         | 1393.2654 | 1403.2956 |
| 526.5262  | 533.7480  | 541.8548  | 1404.1889         | 1408.8822 | 1420.2831 |
| 548.2508  | 550.6801  | 554.5872  | 1420.6903         | 1423.0755 | 1429.2389 |
| 576.6511  | 596.4318  | 610.6787  | 1429.5255         | 1430.8620 | 1433.1528 |
| 611.4219  | 612.1156  | 613.0637  | 1442.5739         | 1458.5645 | 1469.0727 |
| 613.2563  | 613.7595  | 616.1733  | 1470.5358         | 1472.5577 | 1473.7832 |
| 624.0770  | 625.4008  | 628.4625  | 1473.8794         | 1477.1716 | 1484.5426 |
| 633.0403  | 634.9313  | 635.3294  | 1508.2364         | 1553.7319 | 1575.3032 |
| 650.6871  | 659.7782  | 667.3792  | 1578.5974         | 1583.8983 | 1588.2994 |
| 696.2681  | 697.6017  | 698.5447  | 1591.0324         | 1591.9890 | 1593.4551 |
| 699.3902  | 701.9902  | 703.7664  | 1594.2588         | 1604.2221 | 1605.0508 |
| 707.9555  | 724.9296  | 727.1325  | 1605.1106         | 1605.7132 | 1607.8620 |
| 734.2763  | 742.8314  | 749.4245  | 1609.8212         | 1611.2627 | 1614.9040 |
| 750.0709  | 752.4596  | 753.6362  | 1618.8493         | 2953.4861 | 2999.9752 |
| 761.6585  | 765.8036  | 767.2780  | 3029.6010         | 3061.5134 | 3092.1110 |
| 780.3641  | 788.3597  | 794.2656  | 3092.8175         | 3093.8769 | 3094.8179 |
| 798.1001  | 800.7926  | 806.8033  | 3095.0448         | 3096.5212 | 3096.7277 |
| 822.0183  | 826.8589  | 827.5929  | 3098.5935         | 3099.0238 | 3099.3488 |
| 832.5206  | 833.0470  | 834.3253  | 3101.1307         | 3101.5154 | 3102.8336 |
| 836.5338  | 850.8123  | 865.3580  | 3103.3084         | 3104.9876 | 3105.7434 |
| 867.1099  | 884.6909  | 886.7607  | 3107.7196         | 3109.1736 | 3109.5856 |
| 895.1610  | 905.7037  | 909.8202  | 3110.9978         | 3111.3925 | 3112.4297 |
| 910.2239  | 918.1222  | 921.5572  | 3112.6350         | 3113.4934 | 3113.7847 |
| 923.3120  | 930.2704  | 932.1545  | 3117.1630         | 3117.6561 | 3118.9439 |
| 941.1687  | 944.2682  | 945.7796  | 3119.7166         | 3120.3479 | 3121.4089 |
| 949.0751  | 956.0275  | 959.0712  | 3122.2669         | 3122.6231 | 3124.6858 |
| 961.9481  | 963.2988  | 963.9518  | 3125.6979         | 3125.9312 | 3128.1710 |
| 965.2128  | 966.8204  | 972.5470  | 3129.7873         | 3130.9972 | 3135.5433 |
| 976.2214  | 977.1302  | 978.8020  | 3136.9773         | 3140.7739 | 3163.4729 |
| 981.7328  | 983.2116  | 984.5178  | ----              |           |           |
| 986.7771  | 987.7484  | 987.8516  | Int D iso1b S=3/2 |           |           |
| 987.9118  | 988.0735  | 990.4261  | ----              |           |           |
| 990.5692  | 998.7582  | 999.1288  | -3.3972           | 8.0509    | 15.7939   |
| 1004.3418 | 1008.6448 | 1021.0652 | 24.9339           | 25.5492   | 32.5642   |
| 1023.3895 | 1023.8879 | 1024.6525 | 39.6653           | 44.9559   | 47.4207   |
| 1026.6044 | 1028.0302 | 1031.7566 | 51.9733           | 52.6402   | 55.2420   |
| 1035.9921 | 1042.5854 | 1050.4285 | 58.4561           | 61.6622   | 64.1967   |
| 1056.8853 | 1058.7507 | 1063.6147 | 65.5544           | 69.8145   | 73.3102   |
| 1072.1790 | 1073.6386 | 1074.1982 | 74.2815           | 79.7242   | 83.8137   |
| 1076.4786 | 1084.5329 | 1088.1797 | 87.2232           | 88.8934   | 93.0958   |
| 1092.4815 | 1097.1318 | 1101.1835 | 98.7522           | 105.7107  | 106.9020  |
| 1104.1480 | 1133.5131 | 1134.2233 | 107.0328          | 108.1482  | 121.7180  |
| 1134.5891 | 1135.3291 | 1136.1690 | 126.8243          | 131.4943  | 133.1804  |
| 1138.3231 | 1141.4033 | 1142.5547 | 142.1799          | 164.4057  | 168.9902  |
| 1146.6175 | 1150.3327 | 1154.6766 | 182.2581          | 186.7137  | 200.4155  |
| 1155.3977 | 1156.2029 | 1156.6225 | 207.7392          | 218.5422  | 224.5282  |
| 1157.3701 | 1160.7248 | 1168.5911 | 235.1975          | 240.4481  | 242.6718  |
| 1171.1143 | 1180.3331 | 1187.3907 | 254.0588          | 259.9278  | 267.2543  |
| 1190.6399 | 1200.8745 | 1206.6476 | 271.1319          | 279.3215  | 284.5741  |
| 1236.9148 | 1240.0759 | 1265.9104 | 285.3625          | 291.8972  | 298.3477  |

|           |           |           |                   |           |           |
|-----------|-----------|-----------|-------------------|-----------|-----------|
| 308.4473  | 328.0782  | 334.0759  | 1197.7315         | 1205.4316 | 1239.8773 |
| 345.1040  | 355.1456  | 359.5438  | 1241.1867         | 1242.9378 | 1260.2974 |
| 370.6635  | 385.1360  | 388.8741  | 1264.6633         | 1268.5003 | 1276.8855 |
| 400.0492  | 400.4698  | 401.9951  | 1281.4731         | 1281.6921 | 1285.2676 |
| 404.0016  | 404.1115  | 408.2049  | 1288.4241         | 1290.1637 | 1325.4196 |
| 409.0997  | 412.3584  | 415.6744  | 1342.2922         | 1342.9413 | 1345.8025 |
| 421.1906  | 424.5354  | 444.5214  | 1348.3327         | 1355.7052 | 1368.7744 |
| 465.7715  | 467.8567  | 487.4249  | 1368.9975         | 1369.4393 | 1370.6142 |
| 492.1208  | 504.5950  | 512.0966  | 1380.4040         | 1389.2386 | 1396.5646 |
| 514.7223  | 518.0908  | 528.5029  | 1407.5252         | 1418.4388 | 1420.7736 |
| 530.6988  | 543.0326  | 552.6473  | 1424.1710         | 1425.2234 | 1426.8029 |
| 573.6938  | 583.4223  | 592.4575  | 1430.8669         | 1431.4398 | 1431.8433 |
| 611.3978  | 611.5897  | 612.1281  | 1442.4566         | 1456.5364 | 1465.7460 |
| 613.0272  | 613.8196  | 616.0692  | 1466.6671         | 1471.8844 | 1472.0063 |
| 623.7623  | 628.9113  | 632.0941  | 1472.7011         | 1474.3936 | 1484.9510 |
| 633.2382  | 635.1679  | 638.6506  | 1505.5386         | 1553.2162 | 1573.9891 |
| 662.6994  | 666.4000  | 693.8448  | 1576.3915         | 1577.2128 | 1590.1746 |
| 698.8243  | 700.1276  | 701.1100  | 1590.2391         | 1590.2815 | 1590.6512 |
| 701.5120  | 703.5165  | 707.1384  | 1593.2348         | 1598.8393 | 1605.2605 |
| 720.8241  | 731.9102  | 736.4204  | 1605.8341         | 1606.1868 | 1606.6490 |
| 741.8097  | 747.9375  | 751.7349  | 1609.8755         | 1611.1334 | 1612.7527 |
| 753.4246  | 757.7917  | 761.3081  | 1616.9213         | 2957.5412 | 3029.3350 |
| 764.6828  | 767.5091  | 780.3310  | 3030.1150         | 3039.9193 | 3043.4183 |
| 790.7324  | 795.3880  | 797.9182  | 3063.2757         | 3094.2742 | 3094.5012 |
| 815.1418  | 824.5237  | 824.7297  | 3095.9272         | 3095.9652 | 3096.3785 |
| 827.0826  | 829.2006  | 831.8390  | 3096.4903         | 3096.7293 | 3097.2807 |
| 836.9958  | 838.1566  | 839.0595  | 3099.5708         | 3103.4872 | 3104.9956 |
| 848.1829  | 867.5671  | 869.1470  | 3105.4689         | 3105.8802 | 3106.8008 |
| 884.9671  | 890.8785  | 904.6702  | 3107.9290         | 3109.0098 | 3110.1952 |
| 905.2547  | 906.9787  | 919.3888  | 3111.1128         | 3113.1554 | 3115.3026 |
| 920.8036  | 927.2771  | 930.0180  | 3116.2170         | 3116.6952 | 3117.0715 |
| 934.6442  | 941.1628  | 945.0531  | 3117.5870         | 3117.7445 | 3121.4559 |
| 945.2610  | 945.8875  | 948.4430  | 3121.5479         | 3121.9224 | 3122.4809 |
| 959.2365  | 959.8876  | 961.5565  | 3122.9031         | 3122.9252 | 3123.2120 |
| 961.8820  | 962.8229  | 963.1001  | 3124.6753         | 3126.9014 | 3128.5032 |
| 966.6510  | 969.0399  | 974.6403  | 3129.6282         | 3131.5526 | 3132.2461 |
| 976.7235  | 977.0257  | 980.7823  | 3136.0602         | 3142.7224 | 3142.8376 |
| 981.8757  | 982.6730  | 984.7925  | ----              |           |           |
| 986.7737  | 987.1442  | 987.8268  | Int D iso2a S=3/2 |           |           |
| 988.3572  | 989.0096  | 990.4223  | ----              |           |           |
| 994.5888  | 996.1750  | 1004.0193 | 18.2750           | 20.7387   | 24.9831   |
| 1011.0312 | 1020.7555 | 1022.7650 | 30.0362           | 36.7809   | 38.9703   |
| 1024.4001 | 1025.7006 | 1025.9650 | 44.3136           | 45.8409   | 50.3644   |
| 1027.2373 | 1027.7171 | 1038.4540 | 50.5295           | 55.4180   | 57.1561   |
| 1046.9469 | 1049.1060 | 1050.1406 | 58.5725           | 62.6907   | 67.3484   |
| 1060.3172 | 1069.2712 | 1072.5463 | 70.0105           | 72.5898   | 75.4282   |
| 1074.5642 | 1079.9243 | 1085.7990 | 77.9879           | 79.2592   | 87.2725   |
| 1087.9409 | 1090.7660 | 1091.9628 | 89.4652           | 91.3942   | 97.4245   |
| 1094.6449 | 1098.8413 | 1102.5793 | 101.0344          | 103.6202  | 106.2491  |
| 1130.9009 | 1132.4616 | 1134.2395 | 112.8586          | 116.2848  | 122.3460  |
| 1136.9016 | 1137.8278 | 1138.1608 | 128.8263          | 131.4260  | 138.6829  |
| 1139.5523 | 1142.8009 | 1147.2816 | 146.1871          | 158.6478  | 178.0568  |
| 1149.0579 | 1149.7650 | 1155.0673 | 181.3970          | 186.1771  | 192.1868  |
| 1156.2540 | 1157.5963 | 1159.8152 | 205.6696          | 219.4709  | 223.7556  |
| 1163.8609 | 1164.6013 | 1178.8464 | 230.8737          | 235.8833  | 239.7034  |
| 1180.7146 | 1187.1975 | 1197.3801 | 246.1451          | 249.7825  | 256.6653  |

|           |           |           |
|-----------|-----------|-----------|
| 268.3527  | 274.2263  | 281.7458  |
| 285.3848  | 288.1190  | 303.0110  |
| 307.6805  | 312.1887  | 329.6450  |
| 343.1042  | 346.9030  | 349.0773  |
| 369.1580  | 372.9105  | 383.8289  |
| 386.3808  | 398.8556  | 400.2110  |
| 405.6347  | 407.6184  | 409.2494  |
| 409.5834  | 413.0399  | 414.3633  |
| 424.0062  | 429.7128  | 446.5152  |
| 465.3255  | 466.7138  | 483.9161  |
| 500.8666  | 501.5308  | 507.4240  |
| 511.2189  | 516.3099  | 528.0257  |
| 539.5991  | 544.5318  | 553.1379  |
| 585.1521  | 585.9303  | 594.8815  |
| 611.7145  | 612.5256  | 612.7064  |
| 612.9845  | 613.7207  | 615.7605  |
| 622.5214  | 628.4266  | 630.8755  |
| 632.5571  | 633.4366  | 637.6832  |
| 653.2045  | 663.2043  | 688.6938  |
| 694.3700  | 698.6160  | 699.6708  |
| 705.6866  | 709.9473  | 710.6086  |
| 713.5278  | 726.7897  | 732.8194  |
| 737.6404  | 746.6378  | 749.8699  |
| 752.7190  | 755.7512  | 756.1859  |
| 761.6763  | 764.4905  | 778.8746  |
| 783.6779  | 789.0175  | 791.7868  |
| 795.1999  | 818.1941  | 831.3090  |
| 832.3791  | 833.4671  | 836.6583  |
| 840.0837  | 843.6669  | 848.8477  |
| 854.9385  | 866.7739  | 869.4496  |
| 885.2069  | 887.7275  | 900.0792  |
| 903.9862  | 905.3202  | 920.7418  |
| 921.2493  | 925.3571  | 927.0737  |
| 933.5288  | 936.8349  | 943.8847  |
| 945.6409  | 948.5285  | 950.7095  |
| 952.6633  | 956.9739  | 957.3668  |
| 959.9966  | 963.8914  | 965.2301  |
| 965.5357  | 969.9064  | 974.4398  |
| 977.4504  | 978.3783  | 979.4471  |
| 980.5503  | 985.2552  | 986.0265  |
| 987.0475  | 987.8658  | 989.1078  |
| 989.5692  | 990.9008  | 993.6523  |
| 996.1357  | 1004.6024 | 1004.8150 |
| 1009.7417 | 1011.3450 | 1022.4666 |
| 1023.7441 | 1024.2033 | 1024.3372 |
| 1025.0629 | 1029.8332 | 1037.5225 |
| 1043.2634 | 1046.0928 | 1048.2658 |
| 1052.4415 | 1058.6284 | 1070.4588 |
| 1070.7665 | 1074.6084 | 1077.8169 |
| 1079.8215 | 1084.7649 | 1090.4125 |
| 1092.3065 | 1095.7048 | 1100.0429 |
| 1123.3083 | 1133.0032 | 1133.2578 |
| 1133.7482 | 1134.8905 | 1138.2522 |
| 1140.2271 | 1141.3911 | 1143.7839 |
| 1148.6830 | 1150.0382 | 1152.1488 |
| 1154.1798 | 1156.1537 | 1157.0620 |

|           |           |           |
|-----------|-----------|-----------|
| 1157.1953 | 1166.8296 | 1173.0137 |
| 1178.0243 | 1185.5658 | 1189.3003 |
| 1196.4307 | 1207.6500 | 1234.3434 |
| 1241.7896 | 1243.1225 | 1262.0089 |
| 1266.0942 | 1272.9440 | 1273.6534 |
| 1281.3185 | 1282.5186 | 1285.6568 |
| 1289.1255 | 1292.5081 | 1329.1583 |
| 1341.9634 | 1345.0567 | 1352.9613 |
| 1355.5257 | 1356.3591 | 1366.7429 |
| 1368.3654 | 1369.5946 | 1370.8520 |
| 1380.9798 | 1387.6731 | 1396.0623 |
| 1406.5745 | 1418.1844 | 1421.7807 |
| 1422.8032 | 1426.6321 | 1427.7150 |
| 1429.8278 | 1430.0217 | 1432.5254 |
| 1443.1988 | 1456.5536 | 1466.1238 |
| 1468.2581 | 1469.3912 | 1471.9536 |
| 1472.7365 | 1476.4047 | 1485.0871 |
| 1504.4617 | 1553.7802 | 1574.8279 |
| 1577.7573 | 1578.2361 | 1588.7520 |
| 1589.6192 | 1592.4602 | 1593.3818 |
| 1594.1695 | 1597.0790 | 1603.9636 |
| 1604.8464 | 1606.0053 | 1606.5906 |
| 1609.4201 | 1610.0962 | 1612.3403 |
| 1615.7450 | 2956.1740 | 2992.0118 |
| 3021.3834 | 3030.0934 | 3050.4670 |
| 3068.3807 | 3084.6519 | 3092.8331 |
| 3094.4257 | 3095.5012 | 3096.3728 |
| 3096.7550 | 3097.2281 | 3097.5894 |
| 3097.9324 | 3105.1944 | 3105.5808 |
| 3106.3002 | 3106.8549 | 3106.8817 |
| 3109.1401 | 3110.3865 | 3111.3600 |
| 3111.7922 | 3113.8686 | 3114.1026 |
| 3114.7907 | 3115.4903 | 3119.0952 |
| 3119.3904 | 3120.0117 | 3120.6979 |
| 3121.2244 | 3121.5417 | 3123.1420 |
| 3125.9331 | 3127.7541 | 3128.4795 |
| 3129.0897 | 3131.4091 | 3134.8758 |
| 3135.9259 | 3139.0406 | 3145.4843 |
| 3148.9142 | 3149.8379 | 3151.1784 |

----

Int D iso2b S=3/2

----

|          |          |          |
|----------|----------|----------|
| 0.6775   | 25.2362  | 27.3276  |
| 30.5174  | 37.8733  | 41.6412  |
| 44.0133  | 48.3029  | 50.7347  |
| 53.6283  | 58.7132  | 59.9605  |
| 61.5747  | 67.6934  | 70.8579  |
| 71.9999  | 77.1151  | 80.3232  |
| 81.6686  | 83.9511  | 87.6239  |
| 89.7932  | 93.9601  | 97.9935  |
| 105.7291 | 107.3483 | 108.1342 |
| 113.8679 | 115.5867 | 118.3517 |
| 122.8843 | 127.1676 | 137.9080 |
| 145.6652 | 155.4754 | 178.6858 |
| 185.1646 | 189.6848 | 206.8853 |
| 211.2166 | 218.9166 | 227.7032 |

|           |           |           |                   |           |           |
|-----------|-----------|-----------|-------------------|-----------|-----------|
| 234.7419  | 241.5298  | 245.1562  | 1147.7091         | 1150.0465 | 1152.1416 |
| 255.3279  | 258.1866  | 260.9267  | 1155.3714         | 1156.7152 | 1158.3270 |
| 273.8377  | 277.8928  | 284.8293  | 1161.5386         | 1163.6215 | 1176.2200 |
| 287.7274  | 296.2132  | 303.7262  | 1178.4621         | 1183.0113 | 1189.5338 |
| 307.7608  | 315.4173  | 329.6848  | 1194.8493         | 1208.3016 | 1240.4495 |
| 340.7918  | 348.2861  | 369.1957  | 1243.0059         | 1243.1872 | 1261.1314 |
| 373.0716  | 379.4111  | 384.2539  | 1266.2763         | 1271.4280 | 1272.5422 |
| 398.9947  | 401.4699  | 401.7301  | 1278.1800         | 1281.9861 | 1283.8588 |
| 404.3289  | 406.9522  | 409.9771  | 1287.1508         | 1290.1305 | 1328.8420 |
| 410.8800  | 416.7742  | 420.6066  | 1342.0022         | 1344.8698 | 1345.7165 |
| 423.1018  | 426.8543  | 431.7794  | 1352.1419         | 1355.5391 | 1365.9630 |
| 450.8733  | 466.5897  | 482.6499  | 1368.9022         | 1369.2307 | 1372.0564 |
| 499.5274  | 505.2027  | 511.8737  | 1380.1665         | 1388.4414 | 1395.0354 |
| 513.7086  | 519.3057  | 523.7558  | 1407.7945         | 1417.1540 | 1417.9638 |
| 533.3649  | 538.4457  | 553.4457  | 1422.8453         | 1426.0311 | 1427.3008 |
| 573.7214  | 586.5813  | 595.0610  | 1427.6451         | 1429.5823 | 1431.4108 |
| 611.8437  | 612.7384  | 612.8818  | 1441.7988         | 1456.6016 | 1467.0428 |
| 613.5232  | 613.8438  | 615.5964  | 1468.0683         | 1469.2581 | 1471.6196 |
| 624.1618  | 628.1444  | 632.1521  | 1471.8487         | 1472.3053 | 1484.6817 |
| 632.8395  | 635.3818  | 636.9303  | 1505.0562         | 1552.6801 | 1574.7065 |
| 655.0605  | 663.7005  | 689.4066  | 1577.6444         | 1578.0573 | 1589.1186 |
| 693.0425  | 696.2045  | 699.1851  | 1589.5558         | 1591.1383 | 1591.8484 |
| 705.5400  | 706.6771  | 712.3730  | 1591.9034         | 1599.2478 | 1603.9465 |
| 716.6187  | 727.5376  | 733.2644  | 1604.7324         | 1605.7343 | 1606.4973 |
| 748.0929  | 749.5379  | 749.8378  | 1608.9775         | 1609.8350 | 1612.0462 |
| 752.7076  | 757.2872  | 761.1820  | 1613.3428         | 2955.2460 | 2991.2320 |
| 763.6826  | 766.6390  | 781.5757  | 3025.1811         | 3029.5961 | 3031.0018 |
| 783.6393  | 788.8231  | 795.7813  | 3066.7692         | 3094.4748 | 3095.5567 |
| 801.0358  | 817.0680  | 828.2499  | 3096.0862         | 3096.2041 | 3096.4286 |
| 830.2482  | 834.1024  | 840.6537  | 3096.7001         | 3097.1772 | 3097.6110 |
| 842.1587  | 843.5627  | 849.3411  | 3097.7138         | 3104.5704 | 3106.4981 |
| 850.4693  | 867.2672  | 868.8594  | 3106.7290         | 3106.7945 | 3109.0798 |
| 887.7817  | 888.4788  | 905.2487  | 3109.6046         | 3109.8009 | 3109.9890 |
| 906.6994  | 907.3138  | 921.8077  | 3111.0365         | 3115.2745 | 3116.1947 |
| 923.7264  | 925.6293  | 930.3036  | 3116.6083         | 3117.0338 | 3118.6821 |
| 932.5431  | 935.4926  | 943.9984  | 3119.0626         | 3120.9538 | 3121.4578 |
| 944.4321  | 945.5405  | 948.3942  | 3121.5853         | 3122.6786 | 3124.6851 |
| 954.1521  | 955.3741  | 960.7154  | 3127.2325         | 3127.9256 | 3129.0924 |
| 961.4724  | 962.1832  | 964.9709  | 3129.5735         | 3130.1541 | 3133.3320 |
| 971.9419  | 972.8554  | 974.5750  | 3139.5400         | 3144.1580 | 3144.8785 |
| 976.6412  | 977.9598  | 979.7238  | 3146.3362         | 3158.4252 | 3187.8234 |
| 981.2231  | 982.4031  | 986.4365  | ----              |           |           |
| 987.5377  | 988.6915  | 988.7544  | Int D iso1a S=5/2 |           |           |
| 989.2874  | 990.1036  | 994.8643  | ----              |           |           |
| 1000.6038 | 1004.3332 | 1005.4304 | -11.7991          | -3.5122   | 20.4776   |
| 1009.5506 | 1021.3070 | 1023.1518 | 24.4555           | 28.0249   | 36.7252   |
| 1023.6992 | 1024.9641 | 1025.1692 | 39.1516           | 39.5950   | 43.1744   |
| 1026.6954 | 1029.0228 | 1042.7123 | 45.7392           | 49.3493   | 51.1003   |
| 1047.0774 | 1048.7969 | 1054.4175 | 55.4556           | 57.9530   | 59.7990   |
| 1060.1004 | 1064.8561 | 1072.1180 | 61.9613           | 63.6352   | 66.8784   |
| 1072.4622 | 1079.9115 | 1081.0852 | 69.5692           | 77.2146   | 81.0306   |
| 1086.9895 | 1089.8210 | 1091.3311 | 84.1394           | 93.6727   | 94.2740   |
| 1093.8024 | 1095.2659 | 1100.2417 | 96.6090           | 106.1802  | 109.8227  |
| 1125.2929 | 1131.3460 | 1131.7610 | 118.9771          | 123.6243  | 129.6396  |
| 1134.0538 | 1135.3741 | 1138.0633 | 136.3652          | 147.8204  | 156.5901  |
| 1140.5309 | 1141.6728 | 1145.4874 | 164.9343          | 171.7275  | 174.1709  |

|           |           |           |                   |           |           |
|-----------|-----------|-----------|-------------------|-----------|-----------|
| 181.0983  | 198.7031  | 205.3145  | 1133.3778         | 1135.6807 | 1136.9671 |
| 216.1489  | 218.6482  | 225.1074  | 1137.6424         | 1139.8321 | 1143.4070 |
| 227.9804  | 239.3983  | 239.9181  | 1148.8370         | 1153.2748 | 1153.4712 |
| 254.8443  | 260.1779  | 269.5923  | 1154.8158         | 1157.2801 | 1159.1950 |
| 270.2660  | 279.0840  | 282.1748  | 1162.7342         | 1168.5627 | 1171.8028 |
| 291.9771  | 293.6854  | 302.2672  | 1184.6867         | 1186.5201 | 1191.1142 |
| 311.6793  | 322.5690  | 328.5474  | 1209.5528         | 1211.3189 | 1236.5079 |
| 340.8465  | 342.2992  | 345.7028  | 1240.1988         | 1244.4990 | 1265.0922 |
| 357.7435  | 367.7418  | 387.5414  | 1271.3089         | 1273.4429 | 1274.7468 |
| 390.4156  | 395.0827  | 399.9506  | 1277.0313         | 1281.4783 | 1285.1111 |
| 401.3108  | 406.6328  | 408.7684  | 1286.7224         | 1291.1844 | 1322.7836 |
| 411.6630  | 416.2607  | 419.6634  | 1339.8059         | 1350.1189 | 1355.7662 |
| 447.9292  | 460.6538  | 468.7310  | 1356.3277         | 1364.3998 | 1366.7882 |
| 469.7848  | 474.1007  | 483.2198  | 1367.9585         | 1369.1583 | 1371.9719 |
| 504.2695  | 510.8810  | 513.5222  | 1373.5792         | 1394.4769 | 1397.8271 |
| 523.4682  | 532.0743  | 540.8534  | 1405.8920         | 1409.2273 | 1415.1665 |
| 545.1708  | 551.9050  | 567.1630  | 1422.1940         | 1423.9534 | 1426.4474 |
| 575.8284  | 611.4571  | 611.7749  | 1428.8224         | 1429.8967 | 1432.3656 |
| 611.9107  | 613.2429  | 614.3368  | 1438.0626         | 1459.0157 | 1468.3972 |
| 614.8680  | 621.9570  | 625.3807  | 1469.3118         | 1469.6114 | 1472.9281 |
| 630.1507  | 631.0458  | 632.4106  | 1474.7633         | 1476.1900 | 1486.5312 |
| 633.7063  | 635.6235  | 643.1923  | 1510.4248         | 1554.5507 | 1579.0674 |
| 652.8230  | 671.6759  | 686.8405  | 1580.8784         | 1584.5977 | 1587.2472 |
| 694.5207  | 697.2694  | 699.6727  | 1589.4016         | 1590.4216 | 1591.2615 |
| 702.1509  | 703.6837  | 706.6371  | 1593.3127         | 1604.1477 | 1605.2042 |
| 707.2657  | 724.6327  | 728.3348  | 1605.4081         | 1606.6772 | 1607.7527 |
| 737.1654  | 746.6348  | 750.2153  | 1609.4004         | 1609.5328 | 1616.1742 |
| 752.3452  | 753.7839  | 759.5452  | 1616.9563         | 2959.2781 | 3033.8419 |
| 763.0309  | 767.7399  | 776.2969  | 3043.4643         | 3060.8648 | 3067.4697 |
| 783.5217  | 786.2086  | 789.9431  | 3090.0553         | 3090.1382 | 3091.6596 |
| 803.1844  | 815.0894  | 825.6959  | 3092.2912         | 3093.0774 | 3093.6476 |
| 827.7591  | 833.2150  | 834.9922  | 3093.8237         | 3094.8350 | 3097.2076 |
| 836.6927  | 838.2776  | 843.2727  | 3102.2085         | 3102.5466 | 3103.2158 |
| 853.6354  | 860.3077  | 863.9489  | 3103.6673         | 3103.9295 | 3104.2350 |
| 880.5511  | 884.8164  | 894.6008  | 3104.9791         | 3106.1465 | 3107.2150 |
| 901.3906  | 904.0358  | 908.0964  | 3112.3496         | 3112.5274 | 3113.2726 |
| 912.4429  | 919.5392  | 923.9168  | 3113.6293         | 3114.2642 | 3114.7254 |
| 931.6775  | 936.9589  | 938.6709  | 3115.0759         | 3117.5135 | 3117.5450 |
| 939.3678  | 943.4371  | 951.1711  | 3118.8217         | 3120.1204 | 3120.2910 |
| 953.1726  | 953.7198  | 956.0501  | 3120.5244         | 3121.5069 | 3122.4896 |
| 960.0369  | 961.0615  | 961.8803  | 3122.8635         | 3126.5230 | 3129.9438 |
| 965.0332  | 966.5039  | 972.8209  | 3130.9813         | 3131.4773 | 3133.8644 |
| 975.1208  | 975.9569  | 977.9906  | 3145.2623         | 3158.9406 | 3167.4575 |
| 979.1892  | 981.5281  | 982.6031  | ----              |           |           |
| 987.1024  | 987.8244  | 988.4731  | Int D iso1b S=5/2 |           |           |
| 989.3442  | 990.2430  | 999.9383  | ----              |           |           |
| 1002.8996 | 1003.7174 | 1008.5140 | -13.4158          | 4.5577    | 9.3854    |
| 1021.9146 | 1023.0286 | 1023.3657 | 13.0171           | 21.9022   | 27.5449   |
| 1025.2390 | 1025.4527 | 1026.3963 | 30.0046           | 38.4651   | 40.0513   |
| 1038.0103 | 1045.1026 | 1046.9699 | 45.2951           | 48.8200   | 50.9299   |
| 1049.1685 | 1064.3120 | 1066.9060 | 53.4570           | 55.9099   | 60.8752   |
| 1067.0406 | 1071.0379 | 1076.0342 | 62.6525           | 64.7182   | 71.9353   |
| 1082.2462 | 1087.2943 | 1089.4879 | 76.2587           | 77.4995   | 81.5712   |
| 1093.7411 | 1094.8648 | 1096.6505 | 83.3700           | 85.9982   | 92.0332   |
| 1102.0808 | 1107.5452 | 1119.5008 | 95.3999           | 102.0971  | 109.9749  |
| 1129.2772 | 1130.3487 | 1132.6071 | 112.9381          | 117.6288  | 124.2948  |

|           |           |           |
|-----------|-----------|-----------|
| 132.3052  | 139.6348  | 150.7098  |
| 153.2110  | 173.8462  | 174.9176  |
| 186.4301  | 198.7436  | 205.1426  |
| 216.3817  | 225.5645  | 232.8396  |
| 233.7270  | 246.2560  | 248.4880  |
| 255.0923  | 261.9762  | 271.1182  |
| 271.8751  | 276.8530  | 284.2429  |
| 289.7919  | 302.9467  | 307.3214  |
| 313.7120  | 314.1808  | 336.3777  |
| 341.3448  | 346.7934  | 361.6118  |
| 368.6489  | 374.0124  | 398.3364  |
| 398.4422  | 403.6065  | 404.4056  |
| 404.8738  | 406.6254  | 410.8825  |
| 413.5419  | 419.7386  | 419.9798  |
| 434.4616  | 449.4090  | 463.4728  |
| 469.7939  | 479.4566  | 489.5881  |
| 495.3229  | 510.9819  | 512.9352  |
| 514.3047  | 530.4735  | 533.6219  |
| 542.5480  | 552.2357  | 566.9632  |
| 580.9508  | 605.3848  | 612.1405  |
| 612.3868  | 612.5968  | 613.6922  |
| 613.8670  | 615.4421  | 624.7701  |
| 625.4816  | 631.7727  | 632.6105  |
| 634.9658  | 636.4315  | 647.1140  |
| 649.6473  | 655.5070  | 687.6840  |
| 691.0503  | 698.7108  | 700.4658  |
| 700.6618  | 705.8201  | 706.5990  |
| 708.8130  | 722.6665  | 727.9989  |
| 736.5736  | 741.5628  | 749.0262  |
| 751.9717  | 756.3201  | 763.4499  |
| 767.9414  | 772.6654  | 777.3456  |
| 784.4401  | 788.0902  | 798.9462  |
| 804.1879  | 814.3726  | 825.3241  |
| 831.6600  | 832.3854  | 835.7358  |
| 836.0722  | 840.6712  | 842.1805  |
| 848.8322  | 864.1970  | 865.8624  |
| 883.2166  | 884.5750  | 903.5499  |
| 904.4832  | 907.2295  | 910.6551  |
| 913.5781  | 925.1253  | 931.2111  |
| 933.3215  | 936.9050  | 941.2820  |
| 942.8400  | 944.9625  | 952.7942  |
| 957.3595  | 960.2264  | 961.0998  |
| 961.5559  | 964.9162  | 967.6856  |
| 969.6982  | 971.9060  | 974.6654  |
| 974.6837  | 977.1745  | 979.0346  |
| 980.8874  | 982.7863  | 984.9250  |
| 987.6467  | 988.0358  | 989.8785  |
| 990.0676  | 990.8060  | 993.5662  |
| 999.6198  | 1003.0870 | 1011.2128 |
| 1021.6916 | 1022.6050 | 1023.6716 |
| 1023.9273 | 1025.4834 | 1025.5735 |
| 1043.5443 | 1047.6496 | 1048.4244 |
| 1055.8567 | 1063.5205 | 1064.4063 |
| 1070.3358 | 1071.3138 | 1071.8984 |
| 1087.9527 | 1089.0646 | 1093.7776 |
| 1094.9208 | 1096.3796 | 1097.4866 |

|           |           |           |
|-----------|-----------|-----------|
| 1104.4819 | 1107.7675 | 1121.5681 |
| 1125.3711 | 1128.7719 | 1131.9230 |
| 1134.0582 | 1136.2732 | 1138.1364 |
| 1138.8063 | 1140.9025 | 1142.9749 |
| 1151.7425 | 1153.8991 | 1154.7969 |
| 1157.3405 | 1157.8835 | 1158.2463 |
| 1160.6447 | 1167.2236 | 1170.9214 |
| 1182.7227 | 1186.3099 | 1187.9316 |
| 1208.0630 | 1228.3787 | 1236.5306 |
| 1241.9917 | 1265.4294 | 1266.6142 |
| 1270.8970 | 1272.1354 | 1273.5438 |
| 1283.3362 | 1284.5494 | 1286.1598 |
| 1290.2208 | 1292.0779 | 1324.2453 |
| 1343.7181 | 1345.7244 | 1348.4325 |
| 1355.4718 | 1357.0125 | 1367.4124 |
| 1368.9412 | 1370.2784 | 1370.7009 |
| 1378.4258 | 1392.2533 | 1393.7283 |
| 1410.1632 | 1414.4581 | 1417.9732 |
| 1419.6115 | 1423.1600 | 1426.1034 |
| 1428.4483 | 1429.8358 | 1430.2387 |
| 1441.9769 | 1456.7810 | 1466.8761 |
| 1469.3141 | 1470.4208 | 1470.7466 |
| 1472.3542 | 1472.9436 | 1487.0571 |
| 1507.1410 | 1549.4614 | 1576.3761 |
| 1577.3559 | 1579.7291 | 1588.3186 |
| 1590.5056 | 1591.2473 | 1591.5730 |
| 1593.5004 | 1603.4171 | 1603.6220 |
| 1603.9344 | 1604.7959 | 1605.2098 |
| 1608.0444 | 1610.0724 | 1611.2795 |
| 1614.0801 | 2960.5424 | 3035.9924 |
| 3049.7610 | 3056.0545 | 3069.1302 |
| 3088.2134 | 3090.8650 | 3092.3314 |
| 3092.4552 | 3093.5631 | 3094.2370 |
| 3097.9897 | 3098.6115 | 3099.5373 |
| 3101.9125 | 3101.9278 | 3102.6981 |
| 3103.5453 | 3104.5684 | 3104.8892 |
| 3105.0550 | 3106.0650 | 3109.7847 |
| 3111.0254 | 3111.6767 | 3111.7586 |
| 3112.1020 | 3115.7273 | 3116.0854 |
| 3117.0284 | 3118.2156 | 3119.2206 |
| 3120.9426 | 3121.8675 | 3122.1457 |
| 3123.1172 | 3125.8460 | 3126.6811 |
| 3126.7510 | 3134.4012 | 3136.3459 |
| 3137.0770 | 3144.0239 | 3145.0558 |
| 3148.5630 | 3151.8145 | 3154.1362 |

----

Int D iso2a S=5/2

----

|         |         |         |
|---------|---------|---------|
| 5.7848  | 13.1685 | 17.8487 |
| 21.3189 | 28.3357 | 36.3527 |
| 40.6050 | 43.8958 | 47.2314 |
| 50.5902 | 52.5247 | 54.6511 |
| 57.7565 | 62.7420 | 63.2481 |
| 64.9510 | 69.9461 | 72.7078 |
| 76.3440 | 80.1021 | 82.0843 |
| 84.3698 | 86.6569 | 90.8725 |

|           |           |           |                   |           |           |
|-----------|-----------|-----------|-------------------|-----------|-----------|
| 92.9678   | 96.7835   | 100.1991  | 1080.0207         | 1087.6729 | 1089.4886 |
| 107.4784  | 115.4793  | 130.5483  | 1092.8689         | 1093.6958 | 1098.6699 |
| 133.1294  | 138.8801  | 146.7214  | 1106.6236         | 1122.5378 | 1126.9991 |
| 172.4117  | 174.0541  | 185.8164  | 1129.0868         | 1131.8311 | 1132.3843 |
| 188.1363  | 201.6245  | 202.3682  | 1133.2014         | 1135.6694 | 1136.9949 |
| 207.1516  | 215.9875  | 228.2213  | 1140.0925         | 1144.1879 | 1145.6924 |
| 237.7343  | 248.6013  | 251.3278  | 1147.8790         | 1151.7668 | 1154.1754 |
| 254.2020  | 261.9181  | 273.3159  | 1155.6319         | 1156.6839 | 1157.6604 |
| 274.0604  | 281.6307  | 288.3866  | 1158.0013         | 1173.7285 | 1176.9909 |
| 297.0563  | 298.1418  | 309.2246  | 1177.7879         | 1182.1270 | 1189.2093 |
| 323.4716  | 325.5710  | 337.8962  | 1210.5631         | 1238.6526 | 1243.6233 |
| 341.8463  | 343.0922  | 370.2232  | 1250.1052         | 1261.8347 | 1264.5281 |
| 373.1119  | 385.2039  | 399.9293  | 1267.8959         | 1273.9561 | 1276.5353 |
| 401.2431  | 401.7217  | 402.8561  | 1279.3573         | 1280.4961 | 1283.6182 |
| 404.1428  | 404.8922  | 406.1528  | 1285.3886         | 1290.6174 | 1323.8169 |
| 409.3340  | 414.0081  | 421.3262  | 1343.7123         | 1345.0659 | 1346.9770 |
| 440.4491  | 461.4670  | 462.2700  | 1361.3303         | 1361.7991 | 1367.7097 |
| 468.4468  | 487.3236  | 487.7552  | 1368.5012         | 1370.4998 | 1371.8613 |
| 504.5977  | 506.4846  | 508.0392  | 1378.4800         | 1392.6696 | 1394.9861 |
| 516.7170  | 524.5448  | 538.7731  | 1408.2595         | 1417.6309 | 1420.5986 |
| 543.4990  | 552.6269  | 569.4916  | 1422.5156         | 1423.9830 | 1426.1915 |
| 581.2660  | 606.8719  | 611.7793  | 1430.0158         | 1430.3240 | 1430.9612 |
| 612.0217  | 612.3742  | 613.6489  | 1443.0304         | 1455.2496 | 1466.5036 |
| 614.4202  | 615.5013  | 626.0835  | 1467.2544         | 1470.1666 | 1470.4927 |
| 627.7700  | 631.4698  | 632.2968  | 1471.7776         | 1474.6132 | 1487.0855 |
| 634.3405  | 636.5891  | 649.1299  | 1504.5721         | 1547.3625 | 1573.5686 |
| 652.8333  | 654.7487  | 689.3601  | 1576.9223         | 1583.8332 | 1588.5141 |
| 693.7588  | 696.7390  | 698.4219  | 1591.4188         | 1591.6754 | 1592.0542 |
| 700.4707  | 702.0072  | 708.1602  | 1594.6190         | 1601.5999 | 1603.4412 |
| 711.6302  | 719.8920  | 720.8601  | 1605.1856         | 1606.1772 | 1606.3959 |
| 728.1083  | 747.6527  | 750.4351  | 1608.1245         | 1610.4608 | 1611.8942 |
| 753.6120  | 758.4834  | 763.0726  | 1617.6136         | 2960.0712 | 3039.0640 |
| 764.8173  | 765.3412  | 775.4967  | 3040.8452         | 3051.6302 | 3063.7665 |
| 781.0098  | 789.5971  | 791.3707  | 3067.8535         | 3092.9533 | 3093.1155 |
| 794.7082  | 802.8148  | 821.5479  | 3093.8648         | 3094.8674 | 3095.1891 |
| 827.4087  | 830.7071  | 831.5795  | 3096.9381         | 3098.1579 | 3100.0197 |
| 834.0476  | 838.9608  | 843.0788  | 3102.0097         | 3103.2917 | 3103.6329 |
| 845.1864  | 865.8833  | 867.4853  | 3104.4279         | 3106.4607 | 3106.8825 |
| 881.6234  | 889.3949  | 901.5532  | 3108.6640         | 3109.7864 | 3111.8877 |
| 903.0826  | 904.0491  | 915.3791  | 3112.4860         | 3113.4887 | 3114.2651 |
| 920.4214  | 926.8123  | 930.6087  | 3114.7927         | 3115.1580 | 3116.2321 |
| 931.1202  | 937.8606  | 940.4153  | 3117.0886         | 3117.7652 | 3120.7799 |
| 943.1954  | 946.1008  | 954.4443  | 3120.9993         | 3121.9100 | 3122.5444 |
| 959.4958  | 961.3787  | 961.9905  | 3124.6665         | 3125.1615 | 3126.5921 |
| 962.3112  | 963.4004  | 966.0593  | 3127.1756         | 3127.5791 | 3127.9076 |
| 967.1524  | 970.0002  | 975.0767  | 3135.6428         | 3136.7103 | 3137.6501 |
| 976.8227  | 979.4843  | 980.6643  | 3139.0205         | 3152.7043 | 3159.3149 |
| 982.0669  | 984.8007  | 985.7920  | ----              |           |           |
| 987.0189  | 988.1191  | 988.6514  | Int D iso2b S=5/2 |           |           |
| 990.3523  | 991.2229  | 997.3579  | ----              |           |           |
| 998.9332  | 1003.3523 | 1013.8139 | -5.4738           | 20.0991   | 24.8211   |
| 1020.9086 | 1022.1287 | 1022.5762 | 32.9642           | 35.1323   | 40.9099   |
| 1023.8905 | 1024.2992 | 1027.3036 | 42.8284           | 51.1905   | 52.6830   |
| 1043.0348 | 1043.7093 | 1047.4898 | 53.6039           | 58.0855   | 59.8774   |
| 1053.0559 | 1057.4146 | 1065.0929 | 64.6682           | 69.8957   | 70.7216   |
| 1067.1654 | 1068.5540 | 1070.1005 | 71.3650           | 72.9950   | 75.0038   |

|           |           |           |
|-----------|-----------|-----------|
| 83.0524   | 86.2959   | 89.5661   |
| 90.9182   | 94.3739   | 98.3339   |
| 106.1691  | 110.4959  | 113.7082  |
| 118.6012  | 121.5376  | 124.7032  |
| 137.0264  | 150.6678  | 151.9855  |
| 170.4412  | 179.9353  | 183.8373  |
| 187.3152  | 202.8145  | 209.1823  |
| 214.8377  | 218.9050  | 228.7962  |
| 242.7847  | 248.3476  | 253.9472  |
| 257.2688  | 263.2553  | 273.3626  |
| 275.4769  | 276.7386  | 284.2811  |
| 289.2016  | 293.2821  | 309.1851  |
| 313.4338  | 313.9313  | 338.8972  |
| 343.3454  | 344.0774  | 363.1049  |
| 372.8689  | 373.6605  | 396.7698  |
| 397.4031  | 400.7655  | 402.2883  |
| 404.1431  | 410.9192  | 411.6993  |
| 414.5086  | 418.2819  | 422.9612  |
| 443.2131  | 445.0093  | 462.7719  |
| 470.8586  | 474.8516  | 484.6062  |
| 506.0204  | 509.9167  | 515.5101  |
| 519.4279  | 521.1173  | 540.5501  |
| 544.2743  | 553.5750  | 567.6562  |
| 583.6010  | 600.9697  | 612.1425  |
| 612.6529  | 613.0848  | 614.2505  |
| 614.7543  | 615.4370  | 625.5356  |
| 628.2553  | 632.3703  | 633.8581  |
| 634.6116  | 636.2874  | 646.4531  |
| 647.8364  | 653.1978  | 685.1515  |
| 688.3146  | 692.2041  | 699.1013  |
| 704.3239  | 706.8396  | 708.6395  |
| 711.3034  | 723.0601  | 726.6867  |
| 729.7424  | 748.2747  | 751.0742  |
| 752.8394  | 758.7482  | 759.7739  |
| 765.7160  | 771.6842  | 778.8791  |
| 783.4184  | 788.3751  | 790.0118  |
| 792.1529  | 805.0872  | 813.2716  |
| 823.3512  | 833.0396  | 835.6657  |
| 839.0727  | 843.8783  | 846.1826  |
| 848.4167  | 865.4813  | 868.2134  |
| 885.7923  | 886.5268  | 891.3366  |
| 902.5625  | 904.1043  | 905.1439  |
| 918.6714  | 926.4541  | 929.5819  |
| 934.6552  | 938.3424  | 943.6539  |
| 946.4130  | 949.8206  | 949.9207  |
| 956.4331  | 957.7494  | 959.8896  |
| 962.0549  | 963.2894  | 967.6152  |
| 970.3269  | 972.8943  | 974.4844  |
| 976.7011  | 978.7545  | 980.1126  |
| 981.1655  | 986.6663  | 987.3364  |
| 987.8375  | 989.0566  | 989.7757  |
| 989.9284  | 992.6590  | 993.5068  |
| 995.3964  | 1004.7503 | 1010.5432 |
| 1022.4701 | 1022.6686 | 1023.5078 |
| 1023.8215 | 1026.2522 | 1026.4822 |
| 1040.5390 | 1046.3931 | 1049.2248 |

|                    |           |           |
|--------------------|-----------|-----------|
| 1051.9859          | 1063.7305 | 1064.1111 |
| 1065.1654          | 1071.2100 | 1072.0081 |
| 1088.9614          | 1090.9591 | 1092.2878 |
| 1096.5196          | 1097.9400 | 1103.6568 |
| 1104.5992          | 1107.0678 | 1116.9506 |
| 1126.5393          | 1128.5171 | 1129.0056 |
| 1134.2189          | 1137.0858 | 1137.2237 |
| 1139.4244          | 1143.7113 | 1144.4245 |
| 1146.9430          | 1152.7065 | 1155.1221 |
| 1156.3129          | 1158.6786 | 1161.8933 |
| 1165.7315          | 1167.9660 | 1172.2002 |
| 1174.2184          | 1179.2507 | 1182.6608 |
| 1213.0619          | 1235.8958 | 1239.2122 |
| 1241.3429          | 1264.9114 | 1265.3120 |
| 1269.4209          | 1270.2318 | 1273.4917 |
| 1276.8339          | 1277.5376 | 1283.9643 |
| 1286.3112          | 1296.1433 | 1327.4369 |
| 1342.0334          | 1343.2507 | 1352.6868 |
| 1358.2889          | 1359.8425 | 1366.9906 |
| 1368.1594          | 1368.3796 | 1372.4993 |
| 1385.0516          | 1392.7642 | 1394.3498 |
| 1407.7535          | 1418.2106 | 1420.7283 |
| 1421.6223          | 1422.6367 | 1426.6410 |
| 1426.8593          | 1430.6180 | 1430.6898 |
| 1446.1577          | 1455.7809 | 1467.9237 |
| 1468.5340          | 1469.7543 | 1470.3376 |
| 1470.5898          | 1473.4064 | 1488.8808 |
| 1505.9745          | 1551.1580 | 1572.7465 |
| 1579.0147          | 1579.8582 | 1588.5600 |
| 1589.8869          | 1590.4142 | 1591.6131 |
| 1593.0890          | 1601.9925 | 1604.0658 |
| 1604.1104          | 1604.9036 | 1605.0103 |
| 1608.5623          | 1610.7709 | 1612.3700 |
| 1614.4298          | 2958.6800 | 3034.6295 |
| 3038.6163          | 3073.8461 | 3075.4119 |
| 3092.1650          | 3092.8212 | 3092.8565 |
| 3093.0605          | 3093.7302 | 3095.0530 |
| 3100.8864          | 3101.3981 | 3102.1272 |
| 3102.8619          | 3103.2672 | 3103.3298 |
| 3103.6715          | 3105.7262 | 3108.4333 |
| 3111.4649          | 3112.0552 | 3112.8508 |
| 3113.8287          | 3114.4972 | 3115.4490 |
| 3115.6796          | 3116.1529 | 3116.2090 |
| 3119.1073          | 3119.5533 | 3120.5206 |
| 3121.9872          | 3122.9722 | 3124.5644 |
| 3125.3505          | 3126.2018 | 3126.3131 |
| 3136.5113          | 3136.8112 | 3140.5164 |
| 3141.7442          | 3148.2846 | 3158.4831 |
| 3162.7276          | 3170.7046 | 3190.6989 |
| ----               |           |           |
| TS B-C iso1a S=3/2 |           |           |
| ----               |           |           |
| -463.9689          | 9.7267    | 16.8525   |
| 22.9292            | 25.6695   | 28.1496   |
| 32.8223            | 36.4119   | 41.7335   |
| 43.4304            | 46.1978   | 47.5872   |



|           |           |           |
|-----------|-----------|-----------|
| 50.9689   | 53.4124   | 60.9887   |
| 63.4693   | 65.1345   | 67.1394   |
| 73.0003   | 76.4083   | 81.8304   |
| 86.0572   | 90.6005   | 93.9078   |
| 95.1478   | 99.7373   | 106.3609  |
| 110.0824  | 117.6857  | 120.4833  |
| 131.4806  | 135.9730  | 152.9818  |
| 162.9940  | 170.3608  | 177.7892  |
| 181.2147  | 196.9902  | 203.7729  |
| 205.7704  | 218.5430  | 232.7993  |
| 238.4656  | 244.6626  | 248.6888  |
| 252.4659  | 262.3464  | 265.2016  |
| 271.4543  | 281.0368  | 285.4244  |
| 288.6413  | 300.5584  | 303.9655  |
| 311.8660  | 319.9160  | 321.9706  |
| 336.5853  | 347.8121  | 359.0502  |
| 366.5754  | 376.1646  | 385.8216  |
| 398.6478  | 400.3051  | 403.3982  |
| 404.3261  | 407.5649  | 410.1018  |
| 414.8229  | 417.5155  | 422.0040  |
| 425.4013  | 446.5871  | 450.1039  |
| 467.6427  | 475.4170  | 481.3805  |
| 493.7648  | 498.8537  | 506.0557  |
| 511.2472  | 516.9335  | 525.0111  |
| 535.8705  | 541.4178  | 546.3992  |
| 552.0528  | 574.3677  | 581.4172  |
| 609.4018  | 611.6526  | 611.9956  |
| 612.8856  | 614.0448  | 616.7617  |
| 621.8955  | 626.2778  | 629.7226  |
| 631.6664  | 633.2946  | 635.3204  |
| 637.5737  | 661.9827  | 663.8048  |
| 676.1941  | 692.2772  | 694.5141  |
| 698.0881  | 700.0425  | 701.8952  |
| 703.2299  | 707.7490  | 719.2675  |
| 727.5584  | 730.6708  | 736.1927  |
| 741.5632  | 747.5778  | 750.5558  |
| 752.5593  | 761.8330  | 763.7404  |
| 779.5981  | 780.6140  | 784.3246  |
| 790.8642  | 798.0834  | 800.2280  |
| 803.5243  | 819.6999  | 820.9385  |
| 822.6187  | 826.9776  | 832.2938  |
| 835.5906  | 835.9381  | 840.6047  |
| 855.0319  | 866.6287  | 881.8313  |
| 887.4724  | 899.3590  | 900.7600  |
| 910.5564  | 911.7934  | 918.6271  |
| 921.8898  | 926.2562  | 931.4113  |
| 934.4921  | 939.5304  | 941.5662  |
| 944.0390  | 954.0882  | 955.5205  |
| 956.3759  | 958.0670  | 960.6476  |
| 962.4248  | 964.5826  | 966.4189  |
| 971.4954  | 973.9232  | 975.3097  |
| 976.9104  | 979.5382  | 979.7497  |
| 980.8268  | 981.4391  | 982.8620  |
| 984.4175  | 986.7563  | 987.7447  |
| 988.9328  | 990.0608  | 1001.4205 |
| 1004.6987 | 1010.5345 | 1018.1588 |

|           |           |           |
|-----------|-----------|-----------|
| 1022.7595 | 1024.6730 | 1025.2894 |
| 1026.4579 | 1027.1484 | 1040.9125 |
| 1043.8740 | 1044.9937 | 1046.7416 |
| 1058.2011 | 1059.9573 | 1073.9289 |
| 1074.4750 | 1076.8889 | 1080.9533 |
| 1084.0174 | 1087.6691 | 1089.8696 |
| 1092.8274 | 1095.6257 | 1100.1198 |
| 1132.0884 | 1132.7680 | 1133.2090 |
| 1135.6981 | 1135.9856 | 1137.5950 |
| 1141.1739 | 1145.6002 | 1146.4500 |
| 1150.5911 | 1151.6412 | 1152.3723 |
| 1153.8421 | 1154.1858 | 1156.5050 |
| 1157.7977 | 1162.7252 | 1171.4898 |
| 1186.1189 | 1195.7907 | 1203.9506 |
| 1208.0051 | 1210.3464 | 1238.4101 |
| 1239.7873 | 1240.4231 | 1262.7029 |
| 1262.9661 | 1267.7767 | 1277.0188 |
| 1278.4171 | 1285.5180 | 1285.8346 |
| 1288.7639 | 1292.6425 | 1330.5051 |
| 1341.1687 | 1344.0687 | 1351.7452 |
| 1359.0320 | 1362.8071 | 1365.6758 |
| 1367.6922 | 1368.4471 | 1371.1564 |
| 1386.3264 | 1393.0053 | 1398.1149 |
| 1407.0452 | 1417.0593 | 1421.1881 |
| 1426.0376 | 1427.7860 | 1428.9917 |
| 1429.4694 | 1432.1561 | 1434.5668 |
| 1457.0187 | 1463.3056 | 1469.2409 |
| 1471.5391 | 1472.3490 | 1472.6387 |
| 1473.1609 | 1473.2951 | 1502.1772 |
| 1508.5395 | 1558.5262 | 1566.2400 |
| 1575.3654 | 1577.6302 | 1583.2932 |
| 1586.8597 | 1590.2932 | 1591.3636 |
| 1591.9776 | 1594.8490 | 1605.1902 |
| 1606.0417 | 1606.8138 | 1607.4786 |
| 1608.1957 | 1610.8528 | 1611.6682 |
| 1620.7093 | 2957.3838 | 3031.5421 |
| 3054.9286 | 3062.2561 | 3063.0856 |
| 3091.2426 | 3093.7673 | 3096.2574 |
| 3096.9341 | 3097.2870 | 3097.4319 |
| 3098.4544 | 3100.0088 | 3101.3854 |
| 3103.1089 | 3103.3771 | 3103.5225 |
| 3106.0288 | 3106.1476 | 3107.3536 |
| 3109.1692 | 3110.9230 | 3112.9013 |
| 3113.4887 | 3116.6548 | 3117.2097 |
| 3117.8746 | 3118.5678 | 3119.5833 |
| 3119.8265 | 3119.9468 | 3120.1865 |
| 3120.8571 | 3121.8210 | 3124.5897 |
| 3125.0989 | 3125.7927 | 3126.5214 |
| 3128.1039 | 3129.4826 | 3135.4099 |
| 3136.4698 | 3138.9435 | 3144.2216 |
| 3145.3532 | 3154.8231 | 3170.4524 |

----

TS B-C iso1b S=3/2

----

|           |          |         |
|-----------|----------|---------|
| -404.0319 | -20.4219 | 5.7048  |
| 10.8771   | 17.7295  | 27.1396 |

|          |          |          |
|----------|----------|----------|
| 28.6438  | 34.4439  | 38.9582  |
| 41.5835  | 46.7227  | 53.4339  |
| 58.2989  | 62.0878  | 63.8404  |
| 67.0182  | 72.2633  | 73.4328  |
| 79.0467  | 80.7692  | 85.0159  |
| 85.2769  | 92.8310  | 102.6183 |
| 104.8449 | 106.0774 | 110.6688 |
| 112.6817 | 116.5696 | 131.3290 |
| 134.4789 | 140.0687 | 147.6159 |
| 152.4237 | 172.2237 | 173.8279 |
| 181.7624 | 193.6069 | 196.9559 |
| 206.5021 | 219.1358 | 227.7991 |
| 243.4869 | 246.3384 | 250.0608 |
| 252.5439 | 260.0332 | 261.9251 |
| 269.7144 | 281.0080 | 287.9256 |
| 289.1283 | 299.6078 | 305.3494 |
| 316.6867 | 323.2670 | 325.6138 |
| 343.3308 | 343.6788 | 361.6095 |
| 365.4373 | 380.3016 | 392.2593 |
| 399.0825 | 401.7050 | 402.9242 |
| 408.3220 | 409.5129 | 409.9847 |
| 411.0153 | 414.0354 | 419.1621 |
| 426.2405 | 446.6377 | 455.2445 |
| 464.6381 | 472.6397 | 482.9728 |
| 486.7771 | 497.3017 | 504.7790 |
| 507.7659 | 520.3483 | 528.5015 |
| 535.7726 | 537.2421 | 543.9609 |
| 551.5644 | 552.5256 | 581.0672 |
| 609.0779 | 611.7213 | 611.9326 |
| 612.2162 | 614.0097 | 616.2095 |
| 623.1385 | 625.5732 | 628.6670 |
| 631.9912 | 632.6866 | 635.0868 |
| 637.4380 | 662.3195 | 664.2533 |
| 674.6158 | 691.4804 | 694.5008 |
| 697.5709 | 699.5448 | 703.0511 |
| 703.9978 | 714.0882 | 722.3994 |
| 732.7749 | 735.7989 | 739.0829 |
| 744.0733 | 747.6893 | 750.1355 |
| 753.7394 | 759.0019 | 765.6812 |
| 779.2794 | 784.6855 | 786.7823 |
| 789.6747 | 801.1523 | 802.8391 |
| 811.2335 | 812.8196 | 820.9897 |
| 821.6193 | 829.5195 | 832.0057 |
| 834.6533 | 836.5955 | 842.1415 |
| 856.8082 | 867.4996 | 875.9865 |
| 888.2486 | 897.7812 | 903.6501 |
| 908.2621 | 915.7982 | 918.6096 |
| 920.8743 | 924.8313 | 932.9265 |
| 934.0284 | 939.3992 | 942.9823 |
| 944.1993 | 948.4056 | 955.6574 |
| 957.7369 | 959.2099 | 962.1217 |
| 963.6851 | 963.9764 | 967.0849 |
| 973.8002 | 974.8476 | 976.3856 |
| 977.1703 | 978.8781 | 979.8794 |
| 981.7397 | 982.2450 | 983.4058 |
| 984.0965 | 987.2092 | 988.4784 |

|           |           |           |
|-----------|-----------|-----------|
| 989.2223  | 990.3985  | 1002.7510 |
| 1004.8611 | 1010.4241 | 1019.7080 |
| 1022.7937 | 1023.8360 | 1024.8681 |
| 1025.2808 | 1027.1847 | 1030.9080 |
| 1046.5086 | 1046.8842 | 1055.6057 |
| 1060.3744 | 1064.3266 | 1072.3892 |
| 1073.2841 | 1084.3509 | 1086.4916 |
| 1088.1889 | 1089.6823 | 1090.9686 |
| 1095.5041 | 1095.7488 | 1101.3661 |
| 1131.4469 | 1132.6364 | 1133.1108 |
| 1133.6515 | 1134.9600 | 1138.6090 |
| 1139.0622 | 1145.4782 | 1146.6861 |
| 1151.4606 | 1152.1941 | 1153.2745 |
| 1154.5366 | 1155.5875 | 1157.8874 |
| 1158.3972 | 1163.3263 | 1176.7098 |
| 1185.2040 | 1199.6756 | 1202.2139 |
| 1206.4385 | 1208.1251 | 1233.9932 |
| 1236.5238 | 1242.8685 | 1264.7235 |
| 1264.8397 | 1267.8932 | 1275.1523 |
| 1279.7138 | 1282.4495 | 1283.7099 |
| 1287.5199 | 1293.1242 | 1329.1646 |
| 1342.7140 | 1343.3905 | 1348.4796 |
| 1356.5317 | 1366.8705 | 1368.1877 |
| 1369.7140 | 1371.2024 | 1371.4079 |
| 1393.0991 | 1394.1789 | 1396.4623 |
| 1410.1404 | 1418.7128 | 1419.5216 |
| 1426.0671 | 1427.7901 | 1428.9441 |
| 1431.9076 | 1432.0066 | 1434.0238 |
| 1456.5823 | 1465.1792 | 1468.4110 |
| 1470.1108 | 1472.3669 | 1473.1121 |
| 1473.6312 | 1475.1439 | 1506.1555 |
| 1508.6021 | 1558.5124 | 1566.0109 |
| 1574.7587 | 1576.4753 | 1582.7782 |
| 1588.0891 | 1589.5125 | 1591.7754 |
| 1592.7168 | 1596.0725 | 1605.7482 |
| 1606.4646 | 1606.5953 | 1607.0629 |
| 1607.6635 | 1610.7147 | 1611.9346 |
| 1620.4896 | 2957.8184 | 3032.0140 |
| 3034.6203 | 3044.6891 | 3065.5089 |
| 3093.8471 | 3094.2555 | 3095.6169 |
| 3096.0247 | 3096.1214 | 3096.4510 |
| 3097.0030 | 3097.1460 | 3102.6700 |
| 3103.9022 | 3105.1148 | 3105.3670 |
| 3106.1875 | 3106.6740 | 3106.7201 |
| 3108.8578 | 3110.7371 | 3114.1471 |
| 3114.3325 | 3117.5834 | 3117.9489 |
| 3118.1234 | 3118.1687 | 3119.5132 |
| 3120.3345 | 3120.7298 | 3121.3666 |
| 3123.4730 | 3124.5151 | 3125.8498 |
| 3127.6370 | 3127.9290 | 3128.0844 |
| 3129.1128 | 3130.1634 | 3133.4383 |
| 3135.7847 | 3144.2027 | 3146.7177 |
| 3151.2405 | 3153.1829 | 3155.4110 |

----

TS B-C iso2a S=3/2

----

|           |          |          |           |           |           |
|-----------|----------|----------|-----------|-----------|-----------|
| -464.1640 | 9.7286   | 16.8544  | 980.8278  | 981.4397  | 982.8632  |
| 22.9394   | 25.7708  | 28.2648  | 984.4161  | 986.7560  | 987.7444  |
| 32.8234   | 36.4331  | 41.7367  | 988.9330  | 990.0600  | 1001.4161 |
| 43.4338   | 46.2016  | 47.5920  | 1004.6991 | 1010.5308 | 1018.1601 |
| 50.9737   | 53.4258  | 60.9897  | 1022.7591 | 1024.6723 | 1025.2884 |
| 63.4688   | 65.1360  | 67.1471  | 1026.4578 | 1027.1474 | 1040.9241 |
| 73.0040   | 76.4134  | 81.8389  | 1043.8746 | 1045.0092 | 1046.7465 |
| 86.0604   | 90.5913  | 93.9149  | 1058.1965 | 1059.9537 | 1073.9283 |
| 95.1540   | 99.7541  | 106.3608 | 1074.4738 | 1076.8903 | 1080.9589 |
| 110.0907  | 117.6857 | 120.4950 | 1084.0193 | 1087.6658 | 1089.8690 |
| 131.4859  | 135.9801 | 152.9850 | 1092.8329 | 1095.6250 | 1100.1217 |
| 162.9992  | 170.3650 | 177.7923 | 1132.0887 | 1132.7674 | 1133.2088 |
| 181.2147  | 196.9899 | 203.7746 | 1135.6985 | 1135.9858 | 1137.5946 |
| 205.7752  | 218.5407 | 232.7990 | 1141.1738 | 1145.6006 | 1146.4486 |
| 238.4624  | 244.6662 | 248.6911 | 1150.5919 | 1151.6430 | 1152.3755 |
| 252.4634  | 262.3461 | 265.2047 | 1153.8413 | 1154.1854 | 1156.5064 |
| 271.4571  | 281.0419 | 285.4246 | 1157.7989 | 1162.7262 | 1171.4981 |
| 288.6511  | 300.5592 | 303.9664 | 1186.1231 | 1195.7986 | 1203.9441 |
| 311.8686  | 319.9131 | 321.9718 | 1208.0072 | 1210.3466 | 1238.4115 |
| 336.5909  | 347.8109 | 359.0498 | 1239.7849 | 1240.4234 | 1262.7084 |
| 366.5755  | 376.1647 | 385.8234 | 1262.9688 | 1267.7762 | 1277.0181 |
| 398.6542  | 400.3103 | 403.3991 | 1278.4175 | 1285.5171 | 1285.8335 |
| 404.3289  | 407.5657 | 410.1027 | 1288.7656 | 1292.6431 | 1330.5034 |
| 414.8255  | 417.5230 | 422.0042 | 1341.1709 | 1344.0669 | 1351.7454 |
| 425.4047  | 446.5917 | 450.1029 | 1359.0233 | 1362.8034 | 1365.6720 |
| 467.6402  | 475.4206 | 481.3854 | 1367.6923 | 1368.4468 | 1371.1523 |
| 493.7697  | 498.8524 | 506.0630 | 1386.3227 | 1393.0050 | 1398.1145 |
| 511.2477  | 516.9353 | 525.0073 | 1407.0775 | 1417.0606 | 1421.1766 |
| 535.8704  | 541.4160 | 546.3975 | 1426.0388 | 1427.7846 | 1428.9925 |
| 552.0520  | 574.3794 | 581.4193 | 1429.4683 | 1432.1560 | 1434.5653 |
| 609.4014  | 611.6524 | 611.9957 | 1457.0179 | 1463.3040 | 1469.2407 |
| 612.8851  | 614.0444 | 616.7618 | 1471.5393 | 1472.3490 | 1472.6393 |
| 621.8982  | 626.2789 | 629.7217 | 1473.1625 | 1473.2929 | 1502.1721 |
| 631.6655  | 633.2955 | 635.3199 | 1508.5393 | 1558.5258 | 1566.2386 |
| 637.5735  | 661.9855 | 663.8052 | 1575.3636 | 1577.6309 | 1583.2954 |
| 676.1946  | 692.2783 | 694.5133 | 1586.8571 | 1590.2937 | 1591.3630 |
| 698.0878  | 700.0382 | 701.8945 | 1591.9753 | 1594.8467 | 1605.1909 |
| 703.2282  | 707.7501 | 719.2694 | 1606.0424 | 1606.8115 | 1607.4795 |
| 727.5605  | 730.6705 | 736.1938 | 1608.1931 | 1610.8512 | 1611.6683 |
| 741.5653  | 747.5799 | 750.5553 | 1620.7095 | 2957.3585 | 3031.5298 |
| 752.5602  | 761.8315 | 763.7399 | 3054.9246 | 3062.2665 | 3063.1119 |
| 779.6001  | 780.6147 | 784.3297 | 3091.2421 | 3093.7651 | 3096.2582 |
| 790.8594  | 798.0875 | 800.2280 | 3096.9332 | 3097.2868 | 3097.4326 |
| 803.5376  | 819.7138 | 820.9392 | 3098.4549 | 3100.0145 | 3101.3855 |
| 822.6250  | 826.9748 | 832.2964 | 3103.1075 | 3103.3757 | 3103.5207 |
| 835.5886  | 835.9407 | 840.6096 | 3106.0290 | 3106.1485 | 3107.3544 |
| 855.0324  | 866.6290 | 881.8303 | 3109.1682 | 3110.9225 | 3112.8967 |
| 887.4734  | 899.3608 | 900.7600 | 3113.4899 | 3116.6535 | 3117.2084 |
| 910.5565  | 911.7927 | 918.6252 | 3117.8735 | 3118.5625 | 3119.5803 |
| 921.8890  | 926.2580 | 931.4107 | 3119.8154 | 3119.9524 | 3120.1859 |
| 934.5021  | 939.5317 | 941.5671 | 3120.8534 | 3121.8226 | 3124.5892 |
| 944.0378  | 954.0912 | 955.5324 | 3125.0955 | 3125.7908 | 3126.5206 |
| 956.3754  | 958.0690 | 960.6460 | 3128.1083 | 3129.4886 | 3135.4155 |
| 962.4294  | 964.5985 | 966.4222 | 3136.4400 | 3138.9385 | 3144.2344 |
| 971.4943  | 973.9236 | 975.3084 | 3145.3793 | 3154.8263 | 3170.4589 |
| 976.9096  | 979.5364 | 979.7497 | ----      |           |           |

TS C-D iso1a S=5/2

----

|           |          |          |
|-----------|----------|----------|
| -430.8311 | 7.6283   | 15.3291  |
| 17.8395   | 22.8943  | 25.8188  |
| 27.9209   | 30.6684  | 39.1309  |
| 43.9406   | 45.9032  | 47.1422  |
| 51.9133   | 56.0559  | 57.5847  |
| 61.2267   | 66.8750  | 67.7381  |
| 70.7271   | 76.5933  | 81.4826  |
| 85.9004   | 89.2296  | 92.7524  |
| 94.4605   | 98.0787  | 105.7508 |
| 108.7176  | 112.5033 | 119.9832 |
| 136.1450  | 142.4970 | 148.8249 |
| 154.7918  | 166.1094 | 173.3803 |
| 179.3888  | 189.5763 | 194.6472 |
| 214.5919  | 218.8671 | 223.9451 |
| 235.6151  | 241.7879 | 247.8889 |
| 251.5652  | 262.5250 | 268.3909 |
| 269.4450  | 274.4142 | 280.7957 |
| 288.3335  | 295.3171 | 299.4530 |
| 319.3859  | 320.4263 | 325.4115 |
| 340.2118  | 342.7981 | 351.9371 |
| 366.1423  | 382.4363 | 384.7949 |
| 399.2342  | 402.0823 | 404.9798 |
| 407.0169  | 407.8440 | 408.8798 |
| 413.3806  | 416.4540 | 420.3092 |
| 429.5447  | 438.7310 | 462.0439 |
| 463.6609  | 473.9340 | 474.2436 |
| 489.8791  | 492.2814 | 501.2236 |
| 513.0666  | 515.4902 | 528.7045 |
| 537.6340  | 542.8081 | 553.2361 |
| 553.4106  | 576.4167 | 606.3862 |
| 609.8203  | 610.8966 | 612.1707 |
| 613.0431  | 614.4595 | 614.9548 |
| 623.3714  | 625.3927 | 630.9692 |
| 632.2260  | 634.0906 | 635.8785 |
| 650.9141  | 651.7190 | 656.1600 |
| 683.8611  | 688.7654 | 695.3188 |
| 696.7049  | 698.6079 | 703.2895 |
| 705.1240  | 712.7027 | 724.4146 |
| 733.0628  | 736.9968 | 746.0349 |
| 750.5182  | 750.7277 | 753.5761 |
| 756.5896  | 765.7418 | 776.1526 |
| 779.1806  | 780.1768 | 782.7515 |
| 795.6119  | 800.7686 | 819.6371 |
| 820.9095  | 822.7118 | 829.7334 |
| 830.2394  | 833.3918 | 838.1553 |
| 838.9513  | 859.7955 | 860.0587 |
| 864.4064  | 877.3339 | 881.5049 |
| 895.9903  | 906.9592 | 908.7350 |
| 914.0437  | 917.9629 | 921.8447 |
| 931.0831  | 938.7569 | 940.7604 |
| 941.7176  | 942.0144 | 952.7298 |
| 953.8135  | 957.1888 | 960.6513 |
| 961.6896  | 964.9445 | 965.0289 |
| 967.0098  | 972.3627 | 973.8759 |

|           |           |           |
|-----------|-----------|-----------|
| 976.6878  | 977.1211  | 978.2109  |
| 980.3357  | 981.6819  | 984.1803  |
| 985.9369  | 986.2778  | 986.4975  |
| 987.0867  | 988.7695  | 989.2689  |
| 993.4466  | 1003.6116 | 1003.8378 |
| 1011.3551 | 1019.6882 | 1022.8875 |
| 1024.0766 | 1024.3013 | 1025.0022 |
| 1025.2494 | 1025.8955 | 1044.6483 |
| 1047.2119 | 1066.0789 | 1069.9074 |
| 1071.4427 | 1072.0486 | 1074.5449 |
| 1083.0711 | 1087.5766 | 1093.1878 |
| 1093.8656 | 1094.6211 | 1107.0213 |
| 1108.2919 | 1119.4616 | 1130.9505 |
| 1131.3332 | 1132.0320 | 1132.5234 |
| 1135.7113 | 1136.8517 | 1137.7601 |
| 1141.2462 | 1142.8364 | 1143.6466 |
| 1147.3506 | 1151.7855 | 1153.2099 |
| 1154.0100 | 1155.7827 | 1160.2939 |
| 1161.9073 | 1162.3752 | 1163.9452 |
| 1171.6047 | 1191.5471 | 1207.4997 |
| 1221.6977 | 1233.3850 | 1234.2576 |
| 1240.9957 | 1246.1094 | 1264.4327 |
| 1264.5778 | 1268.1161 | 1271.9590 |
| 1273.3814 | 1280.6467 | 1282.2531 |
| 1286.4443 | 1291.5346 | 1326.3611 |
| 1343.3087 | 1343.6844 | 1346.0634 |
| 1358.1914 | 1366.6563 | 1366.8389 |
| 1368.5010 | 1370.2793 | 1373.1210 |
| 1391.6032 | 1396.0247 | 1396.9365 |
| 1409.2306 | 1418.8943 | 1420.2042 |
| 1420.6596 | 1424.6610 | 1425.5493 |
| 1426.2782 | 1430.0767 | 1430.5050 |
| 1447.6450 | 1455.9717 | 1466.4044 |
| 1467.1246 | 1470.5688 | 1471.0367 |
| 1471.0591 | 1471.3265 | 1489.6454 |
| 1508.5400 | 1557.8052 | 1574.3053 |
| 1575.1354 | 1576.0432 | 1580.1516 |
| 1585.7273 | 1587.1733 | 1589.6545 |
| 1590.0378 | 1602.2200 | 1602.8847 |
| 1603.2429 | 1603.7242 | 1604.5052 |
| 1605.1034 | 1608.5190 | 1609.7576 |
| 1619.2563 | 2959.5287 | 3013.9257 |
| 3034.9399 | 3059.3601 | 3067.6915 |
| 3085.9546 | 3089.1678 | 3091.4221 |
| 3091.5511 | 3092.2139 | 3092.8406 |
| 3095.5980 | 3096.1264 | 3096.4852 |
| 3098.8572 | 3100.3018 | 3100.6088 |
| 3101.2179 | 3102.0458 | 3103.7152 |
| 3104.2729 | 3105.1892 | 3106.3685 |
| 3108.8095 | 3108.8691 | 3109.6938 |
| 3110.7829 | 3111.8905 | 3112.9903 |
| 3113.8182 | 3114.9319 | 3115.4702 |
| 3118.2180 | 3119.5947 | 3120.1354 |
| 3120.2121 | 3120.2398 | 3120.9300 |
| 3123.0579 | 3123.9590 | 3124.2679 |
| 3125.0399 | 3128.8077 | 3130.3334 |

3136.4611 3147.7452 3156.6315

----

TS C-D iso1b S=5/2

----

|           |          |          |
|-----------|----------|----------|
| -393.0795 | 5.8123   | 7.8846   |
| 10.9416   | 21.3006  | 27.7471  |
| 32.5210   | 34.0124  | 38.4219  |
| 46.9856   | 48.9481  | 51.8384  |
| 54.3977   | 58.4603  | 63.0672  |
| 66.5834   | 70.5285  | 71.6459  |
| 74.7113   | 80.9720  | 83.1148  |
| 88.3385   | 90.0573  | 93.4380  |
| 95.2560   | 103.4511 | 106.8532 |
| 110.2248  | 115.0663 | 122.1441 |
| 131.0130  | 138.3483 | 152.7497 |
| 158.5296  | 169.4813 | 173.9717 |
| 177.2379  | 184.0757 | 196.4221 |
| 208.3344  | 220.0253 | 227.6512 |
| 237.3872  | 245.2029 | 251.0613 |
| 252.6368  | 262.2046 | 264.4785 |
| 269.4678  | 274.9425 | 280.5525 |
| 291.7505  | 295.6385 | 298.1778 |
| 313.5843  | 322.0677 | 335.6404 |
| 338.2926  | 339.8664 | 357.4640 |
| 360.0077  | 378.3350 | 387.5822 |
| 399.9453  | 400.8477 | 404.8544 |
| 405.5837  | 407.8568 | 413.4296 |
| 416.0249  | 424.5425 | 427.0526 |
| 431.5273  | 439.5072 | 463.9370 |
| 471.7272  | 475.9773 | 478.6359 |
| 489.5516  | 492.4833 | 504.0552 |
| 512.8469  | 517.9136 | 528.8742 |
| 535.4611  | 544.3179 | 553.4292 |
| 555.7381  | 579.1531 | 608.7911 |
| 609.8079  | 611.9985 | 612.8745 |
| 613.9751  | 616.2087 | 616.7148 |
| 621.9419  | 625.0580 | 630.1697 |
| 632.9600  | 633.6507 | 635.1220 |
| 650.4429  | 653.8191 | 657.8439 |
| 679.9403  | 685.8597 | 688.7681 |
| 696.4910  | 699.6192 | 704.8361 |
| 708.4389  | 711.7605 | 721.8763 |
| 731.3901  | 738.2832 | 747.1902 |
| 750.9958  | 751.9634 | 754.0774 |
| 757.0086  | 765.5658 | 772.9081 |
| 779.5477  | 780.2506 | 780.9431 |
| 799.5038  | 801.6223 | 818.8953 |
| 823.2993  | 827.4682 | 829.6488 |
| 831.3923  | 834.4125 | 838.8006 |
| 845.5175  | 861.5722 | 862.8316 |
| 864.8785  | 874.9477 | 881.6896 |
| 897.1095  | 904.1562 | 915.8396 |
| 916.9434  | 919.1817 | 926.0901 |
| 933.1249  | 941.0086 | 941.3509 |
| 942.3726  | 945.9052 | 951.1173 |
| 954.2757  | 960.8949 | 961.3670 |

|           |           |           |
|-----------|-----------|-----------|
| 963.8745  | 966.2479  | 968.5429  |
| 969.7708  | 972.4736  | 973.0220  |
| 973.1967  | 974.6092  | 976.6338  |
| 977.0620  | 982.9238  | 983.6248  |
| 985.1685  | 986.4161  | 986.7380  |
| 988.7148  | 989.1358  | 991.0766  |
| 993.6870  | 1004.7591 | 1005.1511 |
| 1011.6825 | 1022.8946 | 1023.0759 |
| 1023.8741 | 1024.3220 | 1025.8193 |
| 1026.0999 | 1033.7968 | 1044.3662 |
| 1048.1566 | 1067.9979 | 1069.7682 |
| 1072.9782 | 1073.5466 | 1080.0054 |
| 1085.5214 | 1087.8018 | 1091.9948 |
| 1092.9804 | 1094.1491 | 1101.3091 |
| 1114.6518 | 1116.9878 | 1131.5506 |
| 1131.6242 | 1131.9003 | 1133.3188 |
| 1136.6958 | 1137.6010 | 1138.3831 |
| 1141.9190 | 1144.5327 | 1147.9715 |
| 1149.7203 | 1151.7917 | 1152.9010 |
| 1153.8177 | 1159.0297 | 1159.2546 |
| 1164.0557 | 1165.1954 | 1167.3701 |
| 1170.3226 | 1184.1665 | 1207.3551 |
| 1217.2869 | 1222.2040 | 1235.5034 |
| 1241.6056 | 1244.9601 | 1264.3492 |
| 1264.7323 | 1268.1081 | 1273.4049 |
| 1274.2766 | 1282.4491 | 1283.6415 |
| 1284.4662 | 1296.1014 | 1328.3943 |
| 1341.3427 | 1342.7842 | 1344.2215 |
| 1359.9654 | 1366.2534 | 1367.8678 |
| 1369.1151 | 1371.3247 | 1372.1810 |
| 1392.7616 | 1394.7335 | 1395.0767 |
| 1407.4816 | 1419.7770 | 1421.2400 |
| 1422.2622 | 1424.1600 | 1425.5902 |
| 1425.9745 | 1428.9483 | 1430.7514 |
| 1446.8040 | 1455.2073 | 1465.4281 |
| 1467.8180 | 1469.0714 | 1469.9921 |
| 1470.6404 | 1472.2791 | 1491.1456 |
| 1508.9401 | 1558.4248 | 1573.9221 |
| 1574.2283 | 1575.4216 | 1579.3873 |
| 1585.2122 | 1586.2874 | 1588.6157 |
| 1591.3724 | 1601.3832 | 1602.5305 |
| 1602.6267 | 1603.2000 | 1603.8956 |
| 1604.6065 | 1607.3619 | 1610.5477 |
| 1620.1135 | 2961.1695 | 3016.9383 |
| 3034.8638 | 3067.4208 | 3070.3890 |
| 3090.9802 | 3091.1377 | 3091.2489 |
| 3091.7059 | 3091.8949 | 3095.2391 |
| 3095.4994 | 3098.9437 | 3099.3564 |
| 3099.9190 | 3101.7663 | 3103.0660 |
| 3103.2645 | 3103.4371 | 3103.9342 |
| 3106.3509 | 3106.6440 | 3107.0513 |
| 3108.2272 | 3110.0582 | 3111.6256 |
| 3114.4623 | 3114.6590 | 3115.9708 |
| 3117.5556 | 3118.7788 | 3118.9949 |
| 3119.6085 | 3120.0340 | 3120.4209 |
| 3121.5439 | 3121.6125 | 3123.3509 |

|           |           |           |
|-----------|-----------|-----------|
| 3124.2586 | 3124.9960 | 3125.1518 |
| 3129.5702 | 3132.8884 | 3134.7575 |
| 3138.3554 | 3145.4347 | 3151.6213 |

----

TS C-D iso2a S=5/2

----

|           |          |          |
|-----------|----------|----------|
| -430.8244 | 7.6296   | 15.3327  |
| 17.8438   | 22.9015  | 25.8378  |
| 28.0266   | 30.6736  | 39.1312  |
| 43.9406   | 45.9017  | 47.1428  |
| 51.9135   | 56.0560  | 57.5832  |
| 61.2268   | 66.8767  | 67.7370  |
| 70.7257   | 76.5935  | 81.4819  |
| 85.8995   | 89.2271  | 92.7495  |
| 94.4595   | 98.0804  | 105.7491 |
| 108.7166  | 112.5005 | 119.9816 |
| 136.1448  | 142.4977 | 148.8230 |
| 154.7902  | 166.1106 | 173.3806 |
| 179.3892  | 189.5755 | 194.6473 |
| 214.5916  | 218.8657 | 223.9445 |
| 235.6126  | 241.7872 | 247.8873 |
| 251.5644  | 262.5246 | 268.3883 |
| 269.4439  | 274.4133 | 280.7951 |
| 288.3338  | 295.3194 | 299.4526 |
| 319.3864  | 320.4287 | 325.4107 |
| 340.2116  | 342.7988 | 351.9382 |
| 366.1435  | 382.4383 | 384.7984 |
| 399.2356  | 402.0829 | 404.9781 |
| 407.0149  | 407.8429 | 408.8792 |
| 413.3797  | 416.4521 | 420.3079 |
| 429.5450  | 438.7300 | 462.0437 |
| 463.6600  | 473.9339 | 474.2433 |
| 489.8798  | 492.2811 | 501.2242 |
| 513.0673  | 515.4893 | 528.7048 |
| 537.6327  | 542.8080 | 553.2359 |
| 553.4104  | 576.4166 | 606.3891 |
| 609.8205  | 610.8968 | 612.1707 |
| 613.0431  | 614.4594 | 614.9548 |
| 623.3715  | 625.3939 | 630.9691 |
| 632.2261  | 634.0906 | 635.8788 |
| 650.9145  | 651.7207 | 656.1607 |
| 683.8606  | 688.7660 | 695.3149 |
| 696.7058  | 698.6075 | 703.2880 |
| 705.1234  | 712.7026 | 724.4148 |
| 733.0632  | 736.9970 | 746.0352 |
| 750.5181  | 750.7276 | 753.5758 |
| 756.5895  | 765.7418 | 776.1529 |
| 779.1805  | 780.1762 | 782.7521 |
| 795.6039  | 800.7752 | 819.6353 |
| 820.9056  | 822.7096 | 829.7324 |
| 830.2362  | 833.3917 | 838.1539 |
| 838.9503  | 859.7951 | 860.0554 |
| 864.4065  | 877.3325 | 881.5038 |
| 895.9899  | 906.9598 | 908.7351 |
| 914.0437  | 917.9623 | 921.8443 |
| 931.0827  | 938.7564 | 940.7601 |

|           |           |           |
|-----------|-----------|-----------|
| 941.7181  | 942.0182  | 952.7287  |
| 953.8132  | 957.1888  | 960.6515  |
| 961.6899  | 964.9439  | 965.0439  |
| 967.0042  | 972.3621  | 973.8763  |
| 976.6879  | 977.1211  | 978.2112  |
| 980.3343  | 981.6813  | 984.1793  |
| 985.9361  | 986.2776  | 986.4973  |
| 987.0869  | 988.7688  | 989.2683  |
| 993.4422  | 1003.6115 | 1003.8355 |
| 1011.3498 | 1019.6878 | 1022.8874 |
| 1024.0764 | 1024.3016 | 1025.0024 |
| 1025.2489 | 1025.8948 | 1044.6486 |
| 1047.2113 | 1066.0794 | 1069.9076 |
| 1071.4441 | 1072.0487 | 1074.5452 |
| 1083.0718 | 1087.5762 | 1093.1880 |
| 1093.8686 | 1094.6212 | 1107.0210 |
| 1108.2917 | 1119.4591 | 1130.9508 |
| 1131.3335 | 1132.0321 | 1132.5234 |
| 1135.7119 | 1136.8512 | 1137.7600 |
| 1141.2465 | 1142.8365 | 1143.6465 |
| 1147.3508 | 1151.7866 | 1153.2098 |
| 1154.0097 | 1155.7833 | 1160.2928 |
| 1161.9072 | 1162.3746 | 1163.9451 |
| 1171.6038 | 1191.5480 | 1207.5017 |
| 1221.6978 | 1233.3831 | 1234.2575 |
| 1240.9956 | 1246.1088 | 1264.4330 |
| 1264.5776 | 1268.1163 | 1271.9594 |
| 1273.3811 | 1280.6474 | 1282.2536 |
| 1286.4448 | 1291.5348 | 1326.3617 |
| 1343.3087 | 1343.6954 | 1346.0644 |
| 1358.1731 | 1366.6568 | 1366.8384 |
| 1368.5005 | 1370.2798 | 1373.1208 |
| 1391.5990 | 1396.0246 | 1396.9370 |
| 1409.2566 | 1418.8935 | 1420.2044 |
| 1420.6471 | 1424.6611 | 1425.5494 |
| 1426.2780 | 1430.0767 | 1430.5050 |
| 1447.6451 | 1455.9717 | 1466.4047 |
| 1467.1252 | 1470.5690 | 1471.0371 |
| 1471.0591 | 1471.3268 | 1489.6454 |
| 1508.5400 | 1557.8053 | 1574.3048 |
| 1575.1356 | 1576.0432 | 1580.1502 |
| 1585.7277 | 1587.1736 | 1589.6549 |
| 1590.0378 | 1602.2197 | 1602.8849 |
| 1603.2428 | 1603.7242 | 1604.5054 |
| 1605.1034 | 1608.5190 | 1609.7577 |
| 1619.2563 | 2959.5107 | 3013.9264 |
| 3034.9401 | 3059.3627 | 3067.6959 |
| 3085.9525 | 3089.1653 | 3091.4223 |
| 3091.5516 | 3092.2150 | 3092.8412 |
| 3095.5986 | 3096.1253 | 3096.4864 |
| 3098.8568 | 3100.3026 | 3100.6094 |
| 3101.2131 | 3102.0474 | 3103.7147 |
| 3104.2740 | 3105.1856 | 3106.3686 |
| 3108.8090 | 3108.8692 | 3109.6936 |
| 3110.7828 | 3111.8998 | 3112.9906 |
| 3113.8193 | 3114.9321 | 3115.4704 |

|           |           |           |
|-----------|-----------|-----------|
| 3118.2183 | 3119.5949 | 3120.1356 |
| 3120.2124 | 3120.2399 | 3120.9298 |
| 3123.0572 | 3123.9593 | 3124.2669 |
| 3125.0401 | 3128.8069 | 3130.3334 |
| 3136.4627 | 3147.7459 | 3156.6260 |

**5. Table S4.** Crystal and refinement data for  
**2.**

|                                            |                                                                                   |
|--------------------------------------------|-----------------------------------------------------------------------------------|
|                                            | Mn[O-terphenyl-<br>O] <sup>Ph</sup> (THF) <sub>2</sub>                            |
| formula                                    | C <sub>52</sub> H <sub>48</sub> MnO <sub>4</sub> ×CH <sub>2</sub> Cl <sub>2</sub> |
| fw                                         | 875.76                                                                            |
| crystal system                             | Orthorhombic                                                                      |
| space group                                | <i>P</i> 2 <sub>1</sub> 2 <sub>1</sub> 2 <sub>1</sub>                             |
| <i>a</i> (Å)                               | 16.9723 (17)                                                                      |
| <i>b</i> (Å)                               | 17.3689 (15)                                                                      |
| <i>c</i> (Å)                               | 14.5364 (13)                                                                      |
| <i>α</i> (deg)                             | 90.00                                                                             |
| <i>β</i> (deg)                             | 90.00                                                                             |
| <i>γ</i> (deg)                             | 90.00                                                                             |
| <i>V</i> (Å <sup>3</sup> )                 | 4285.2 (7)                                                                        |
| <i>D<sub>c</sub></i> (g cm <sup>-3</sup> ) | 1.357                                                                             |
| <i>Z</i>                                   | 4                                                                                 |
| <i>μ</i> (mm <sup>-1</sup> )               | 0.483                                                                             |
| <i>T</i> (K)                               | 100(2)                                                                            |
| <i>R<sub>I</sub></i>                       | 0.0893                                                                            |
| GOF                                        | 1.121                                                                             |
